# Supplementary material for: RPG acts as a central determinant for infectosome formation and cellular polarization during intracellular rhizobial infections
Source: eLife journal article supplement (doi:10.7554/elife.80741), 2023-02-22
Supplement: fig1-data1 [file Figure 1D - IT diameter.xlsx]

## Sheet: Values
A17					rpg-1					WT R108					rpg-2
	Pro	Int	Dis			Pro	Int	Dis			Pro	Int	Dis			Pro	Int	Dis
plant 1	0.661	1.403	1.32		plant 1	3.446	4.015	4.14		plant 1	1.348	1.219	1.622		plant 1	3.222	6.732	4.098
plant 1	0.766	0.879	1.162		plant 1	2.489	3.563	2.398		plant 1	1.384	0.806	1.402		plant 1	5.138	3.445	5.992
plant 2	1.48	1.522	1.806		plant 1	3.229	1.652	3.939		plant 1	1.166	1.224	0.935		plant 1	3.904	3.704	3.118
plant 2	1.465	1.365	0.817		plant 1	2.708	6.234	7.116		plant 2	1.419	1.569	1.468		plant 1	2.677	3.258	3.453
plant 2	1.038	1.488	2.047		plant 2	2.856	3.327	2.922		plant 2	1.573	1.467	1.328		plant 1	3.536	3.638	5.219
plant 2	1.065	0.997	1.438		plant 2	2.883	4.466	6.209		plant 3	1.02	1.721	1.675		plant 1	5.657	3.9	8.738
plant 2	1.033	1.634	1.252		plant 2	3.359	4.175	3.871		plant 3	1.277	1.453	1.669		plant 1	4.733	2.678	3.558
plant 2	0.908	1.023	3.196		plant 3	3.676	4.148	9.224		plant 3	0.73	1.467	2.699		plant 1	3.588	2.21	4.437
plant 2	1.196	0.974	2.405		plant 3	2.425	2.277	2.65		plant 3	1.839	1.461	1.64		plant 1	4.201	6.648	6.087
plant 2	0.715	1.054	1.132		plant 3	3.158	5.146	3.561		plant 3	1.291	1.06	1.121		plant 1	1.219	3.087	3.04
plant 3	0.98	1.182	1.994		plant 3	3.319	2.605	3.991		plant 3	1.67	1.608	1.29		plant 1	3.604	3.932	3.266
plant 3	0.812	1.889	1.889		plant 4	2.703	4.1	3.691		plant 3	1.197	0.642	0.67		plant 2	3.314	3.216	5.661
plant 3	0.963	1.104	0.861		plant 4	2.534	2.206	3.212		plant 3	0.649	0.901	1.066		plant 2	3.512	4.095	3.582
plant 3	1.015	0.922	1.038		plant 4	4.303	5.188	7.618		plant 3	0.92	1.076	1.465		plant 2	4.269	6.887	4.272
plant 3	0.941	3.393	2.042		plant 4	2.732	2.444	3.046		plant 4	0.969	1.283	1.519		plant 2	4.052	3.821	5.158
plant 4	1.266	1.289	1.113		plant 4	3.359	3.305	3.194		plant 4	1.691	1.786	1.562		plant 2	3.589	5.474	4.911
plant 4	1.362	0.7	0.693		plant 4	5.464	4.222	3.485		plant 5	0.736	1.389	1.09		plant 2	5.954	2.668	5.585
plant 4	1.004	1.312	1.23		plant 5	4.484	13.483	5.738		plant 5	1.47	1.285	0.699		plant 3	5.395	8.876	5.071
plant 4	1.199	1.328	0.983		plant 5	3.03	5.328	4.933		plant 5	1.038	1.274	1.115		plant 3	0.821	5.47	4.556
plant 5	1.252	1.637	2.024		plant 5	3.781	4.109	3.671		plant 5	1.751	0.708	1.096		plant 3	4.965	4.993	4.98
plant 5	1.14	1.479	1.541		plant 5	4.479	7.081	3.809		plant 5	0.921	0.816	1.418		plant 3	0.786	3.957	4.053
plant 5	1.105	1.149	1.227		plant 5	3.858	3.077	4.509		plant 6	1.806	1.468	0.964		plant 3	2.087	5.175	5.937
plant 5	1.571	1.666	1.24		plant 6	3.447	2.612	2.01		plant 6	0.746	0.774	1.377		plant 3	1.923	5.552	4.962
plant 6	1.258	1.657	1.568		plant 6	2.55	8.457	3.073		plant 7	1.771	0.736	0.905		plant 3	3.198	3.66	5.752
plant 6	1.374	1.934	1.54		plant 6	3.011	3.617	7.385		plant 7	1.448	1.345	1.563		plant 3	5.162	3.513	5.983
plant 6	1.397	1.62	1.938		plant 6	2.796	3.041	5.288		plant 7	1.182	1.148	1.32		plant 3	4.477	6.874	5.609
plant 6	0.92	1.242	1.404		plant 6	3.171	2.316	4.424		plant 7	1.132	1.079	1.236		plant 3	4.222	4.952	6.253
plant 7	1.26	1.384	1.089		plant 6	2.116	1.79	2.37		plant 8	0.768	1.06	1.539		plant 4	4.668	3.654	2.597
plant 7	0.871	1.283	1.774		plant 7	4.831	5.153	2.426		plant 8	0.788	0.843	0.892		plant 4	3.618	3.679	5.168
plant 7	0.866	1.22	1.388		plant 7	1.786	3.876	2.409		plant 8	1.149	1.684	1.553		plant 4	2.632	3.254	5.068
plant 7	0.906	1.06	1.032		plant 7	1.613	3.074	4.45		plant 8	1.184	1.18	0.791		plant 4	2.504	3.413	6.011
plant 8	0.886	1.305	1.253		plant 7	2.148	2.054	2.095		plant 8	0.747	0.898	1.064		plant 5	3.873	3.256	5.672
plant 8	0.81	0.987	0.987		plant 7	3.311	2.478	2.478		plant 9	1.708	1.498	1.701		plant 5	3.148	3.038	4.253
plant 8	0.725	0.931	0.91		plant 8	2.403	3.452	2.592		plant 9	1.015	1.147	0.856		plant 5	1.504	2.906	2.238
plant 8	0.988	0.832	0.962		plant 8	2.183	5.33	4.22		plant 9	0.598	0.735	0.724		plant 5	2.646	3.055	1.707
plant 9	1.199	1.1	1.414		plant 8	2.141	1.882	2.69		plant 9	0.692	0.653	0.79		plant 6	0.847	1.337	2.127
plant 9	1.356	1.02	1.334		plant 8	2.189	2.632	3.087		plant 9	0.934	0.885	1.517		plant 6	3.903	5.597	3.543
plant 9	1.493	0.99	1.279		plant 8	4.279	2.849	6.497		plant 9	2.341	1.248	1.598		plant 6	1.7	4.459	3.358
plant 9	0.898	1.321	0.858		plant 8	1.82	6.737	4.994		plant 9	1.415	1.171	1.665		plant 6	2.334	4.094	4.812
plant 10	0.676	0.723	1.238		plant 9	1.747	3.918	4.412		plant 10	1.127	1.311	0.828		plant 7	1.456	4.31	2.476
plant 10	1.088	0.635	0.774		plant 9	1.745	3.239	3.319		plant 10	0.615	1.212	0.942		plant 7	2.898	3.477	3.305
plant 10	0.583	0.715	1.375		plant 9	2.665	4.039	4.151		plant 10	1.107	0.726	1.19		plant 7	3.648	3.511	5.107
plant 10	0.799	1.03	1.633		plant 9	1.433	2.571	4.346		plant 10	0.754	0.913	1.122		plant 7	2.976	5.13	4.975
plant 10	0.815	0.657	2.014		plant 9	2.202	1.719	5.323		plant 10	1.798	1.008	1.471		plant 7	3.317	2.169	3.044
					plant 10	4.03	7.197	3.94							plant 7	1.916	2.063	4.572
					plant 10	2.775	1.941	4.987							plant 8	2.59	4.64	2.897
					plant 10	3.203	3.443	2.663							plant 8	2.6	2.122	2.73
					plant 10	3.095	1.4	1.629							plant 8	2.982	5.138	2.931
					plant 10	2.087	6.208	2.602							plant 8	3.655	2.965	6.19
					plant 11	4.262	4.825	2.711							plant 8	2.92	2.702	5.267
					plant 11	4.691	2.85	2.082							plant 9	4.193	6.935	4.179
					plant 11	1.622	4.513	2.528							plant 9	3.856	4.248	3.719
					plant 11	2.904	3.208	2.735							plant 9	2.643	1.348	5.237
															plant 9	2.307	3.276	2.407
															plant 9	4.857	2.394	0.653
															plant 9	5.541	3.937	3.754
															plant 10	2.707	5.756	2.087
															plant 10	3.038	3.242	7.439
															plant 10	2.23	5.203	5.161
															plant 10	0.935	4.246	5.688
															plant 10	4.059	5.396	6.136

## Sheet: Kruskal-Wallis
Kruskal-Wallis test
P value	<0,0001
Exact or approximate P value?	Approximate
P value summary	****
Do the medians vary signif. (P < 0.05)?	Yes
Number of groups	12
Kruskal-Wallis statistic	418.3
Data summary
Number of treatments (columns)	12
Number of values (total)	606
Number of families	1
Number of comparisons per family	66
Alpha	0.05
Dunn's multiple comparisons test	Mean rank diff,	Significant?	Summary	Adjusted P Value
WT A17 pro vs. WT A17 int	-42.63	No	ns	>0,9999
WT A17 pro vs. WT A17 dis	-73.53	No	ns	>0,9999
WT A17 pro vs. rpg-1 pro	-273	Yes	****	<0,0001
WT A17 pro vs. rpg-1 int	-326.7	Yes	****	<0,0001
WT A17 pro vs. rpg-1 dis	-334.3	Yes	****	<0,0001
WT A17 pro vs. WT R108 pro	-33.95	No	ns	>0,9999
WT A17 pro vs. WT R108 int	-26.64	No	ns	>0,9999
WT A17 pro vs. WT R108 dis	-52.66	No	ns	>0,9999
WT A17 pro vs. rpg-2 pro	-285.8	Yes	****	<0,0001
WT A17 pro vs. rpg-2 int	-350.7	Yes	****	<0,0001
WT A17 pro vs. rpg-2 dis	-374.3	Yes	****	<0,0001
WT A17 int vs. WT A17 dis	-30.91	No	ns	>0,9999
WT A17 int vs. rpg-1 pro	-230.4	Yes	****	<0,0001
WT A17 int vs. rpg-1 int	-284.1	Yes	****	<0,0001
WT A17 int vs. rpg-1 dis	-291.7	Yes	****	<0,0001
WT A17 int vs. WT R108 pro	8.67	No	ns	>0,9999
WT A17 int vs. WT R108 int	15.99	No	ns	>0,9999
WT A17 int vs. WT R108 dis	-10.03	No	ns	>0,9999
WT A17 int vs. rpg-2 pro	-243.1	Yes	****	<0,0001
WT A17 int vs. rpg-2 int	-308	Yes	****	<0,0001
WT A17 int vs. rpg-2 dis	-331.7	Yes	****	<0,0001
WT A17 dis vs. rpg-1 pro	-199.5	Yes	****	<0,0001
WT A17 dis vs. rpg-1 int	-253.2	Yes	****	<0,0001
WT A17 dis vs. rpg-1 dis	-260.8	Yes	****	<0,0001
WT A17 dis vs. WT R108 pro	39.58	No	ns	>0,9999
WT A17 dis vs. WT R108 int	46.9	No	ns	>0,9999
WT A17 dis vs. WT R108 dis	20.88	No	ns	>0,9999
WT A17 dis vs. rpg-2 pro	-212.2	Yes	****	<0,0001
WT A17 dis vs. rpg-2 int	-277.1	Yes	****	<0,0001
WT A17 dis vs. rpg-2 dis	-300.8	Yes	****	<0,0001
rpg-1 pro vs. rpg-1 int	-53.71	No	ns	>0,9999
rpg-1 pro vs. rpg-1 dis	-61.34	No	ns	>0,9999
rpg-1 pro vs. WT R108 pro	239	Yes	****	<0,0001
rpg-1 pro vs. WT R108 int	246.4	Yes	****	<0,0001
rpg-1 pro vs. WT R108 dis	220.3	Yes	****	<0,0001
rpg-1 pro vs. rpg-2 pro	-12.77	No	ns	>0,9999
rpg-1 pro vs. rpg-2 int	-77.68	No	ns	>0,9999
rpg-1 pro vs. rpg-2 dis	-101.3	No	ns	0.1356
rpg-1 int vs. rpg-1 dis	-7.632	No	ns	>0,9999
rpg-1 int vs. WT R108 pro	292.7	Yes	****	<0,0001
rpg-1 int vs. WT R108 int	300.1	Yes	****	<0,0001
rpg-1 int vs. WT R108 dis	274	Yes	****	<0,0001
rpg-1 int vs. rpg-2 pro	40.93	No	ns	>0,9999
rpg-1 int vs. rpg-2 int	-23.97	No	ns	>0,9999
rpg-1 int vs. rpg-2 dis	-47.62	No	ns	>0,9999
rpg-1 dis vs. WT R108 pro	300.4	Yes	****	<0,0001
rpg-1 dis vs. WT R108 int	307.7	Yes	****	<0,0001
rpg-1 dis vs. WT R108 dis	281.7	Yes	****	<0,0001
rpg-1 dis vs. rpg-2 pro	48.56	No	ns	>0,9999
rpg-1 dis vs. rpg-2 int	-16.34	No	ns	>0,9999
rpg-1 dis vs. rpg-2 dis	-39.99	No	ns	>0,9999
WT R108 pro vs. WT R108 int	7.318	No	ns	>0,9999
WT R108 pro vs. WT R108 dis	-18.7	No	ns	>0,9999
WT R108 pro vs. rpg-2 pro	-251.8	Yes	****	<0,0001
WT R108 pro vs. rpg-2 int	-316.7	Yes	****	<0,0001
WT R108 pro vs. rpg-2 dis	-340.4	Yes	****	<0,0001
WT R108 int vs. WT R108 dis	-26.02	No	ns	>0,9999
WT R108 int vs. rpg-2 pro	-259.1	Yes	****	<0,0001
WT R108 int vs. rpg-2 int	-324	Yes	****	<0,0001
WT R108 int vs. rpg-2 dis	-347.7	Yes	****	<0,0001
WT R108 dis vs. rpg-2 pro	-233.1	Yes	****	<0,0001
WT R108 dis vs. rpg-2 int	-298	Yes	****	<0,0001
WT R108 dis vs. rpg-2 dis	-321.7	Yes	****	<0,0001
rpg-2 pro vs. rpg-2 int	-64.9	No	ns	>0,9999
rpg-2 pro vs. rpg-2 dis	-88.56	No	ns	0.3442
rpg-2 int vs. rpg-2 dis	-23.66	No	ns	>0,9999
Test details	Mean rank 1	Mean rank 2	Mean rank diff,	n1	n2	Z
WT A17 pro vs. WT A17 int	103.4	146	-42.63	44	44	1.142
WT A17 pro vs. WT A17 dis	103.4	176.9	-73.53	44	44	1.97
WT A17 pro vs. rpg-1 pro	103.4	376.4	-273	44	53	7.645
WT A17 pro vs. rpg-1 int	103.4	430.1	-326.7	44	53	9.149
WT A17 pro vs. rpg-1 dis	103.4	437.7	-334.3	44	53	9.363
WT A17 pro vs. WT R108 pro	103.4	137.4	-33.95	44	44	0.9096
WT A17 pro vs. WT R108 int	103.4	130	-26.64	44	44	0.7136
WT A17 pro vs. WT R108 dis	103.4	156.1	-52.66	44	44	1.411
WT A17 pro vs. rpg-2 pro	103.4	389.2	-285.8	44	61	8.252
WT A17 pro vs. rpg-2 int	103.4	454.1	-350.7	44	61	10.13
WT A17 pro vs. rpg-2 dis	103.4	477.7	-374.3	44	61	10.81
WT A17 int vs. WT A17 dis	146	176.9	-30.91	44	44	0.8281
WT A17 int vs. rpg-1 pro	146	376.4	-230.4	44	53	6.452
WT A17 int vs. rpg-1 int	146	430.1	-284.1	44	53	7.956
WT A17 int vs. rpg-1 dis	146	437.7	-291.7	44	53	8.169
WT A17 int vs. WT R108 pro	146	137.4	8.67	44	44	0.2323
WT A17 int vs. WT R108 int	146	130	15.99	44	44	0.4283
WT A17 int vs. WT R108 dis	146	156.1	-10.03	44	44	0.2688
WT A17 int vs. rpg-2 pro	146	389.2	-243.1	44	61	7.021
WT A17 int vs. rpg-2 int	146	454.1	-308	44	61	8.896
WT A17 int vs. rpg-2 dis	146	477.7	-331.7	44	61	9.579
WT A17 dis vs. rpg-1 pro	176.9	376.4	-199.5	44	53	5.586
WT A17 dis vs. rpg-1 int	176.9	430.1	-253.2	44	53	7.09
WT A17 dis vs. rpg-1 dis	176.9	437.7	-260.8	44	53	7.304
WT A17 dis vs. WT R108 pro	176.9	137.4	39.58	44	44	1.06
WT A17 dis vs. WT R108 int	176.9	130	46.9	44	44	1.256
WT A17 dis vs. WT R108 dis	176.9	156.1	20.88	44	44	0.5592
WT A17 dis vs. rpg-2 pro	176.9	389.2	-212.2	44	61	6.129
WT A17 dis vs. rpg-2 int	176.9	454.1	-277.1	44	61	8.003
WT A17 dis vs. rpg-2 dis	176.9	477.7	-300.8	44	61	8.686
rpg-1 pro vs. rpg-1 int	376.4	430.1	-53.71	53	53	1.579
rpg-1 pro vs. rpg-1 dis	376.4	437.7	-61.34	53	53	1.804
rpg-1 pro vs. WT R108 pro	376.4	137.4	239	53	44	6.694
rpg-1 pro vs. WT R108 int	376.4	130	246.4	53	44	6.899
rpg-1 pro vs. WT R108 dis	376.4	156.1	220.3	53	44	6.171
rpg-1 pro vs. rpg-2 pro	376.4	389.2	-12.77	53	61	0.3886
rpg-1 pro vs. rpg-2 int	376.4	454.1	-77.68	53	61	2.363
rpg-1 pro vs. rpg-2 dis	376.4	477.7	-101.3	53	61	3.082
rpg-1 int vs. rpg-1 dis	430.1	437.7	-7.632	53	53	0.2244
rpg-1 int vs. WT R108 pro	430.1	137.4	292.7	53	44	8.199
rpg-1 int vs. WT R108 int	430.1	130	300.1	53	44	8.403
rpg-1 int vs. WT R108 dis	430.1	156.1	274	53	44	7.675
rpg-1 int vs. rpg-2 pro	430.1	389.2	40.93	53	61	1.245
rpg-1 int vs. rpg-2 int	430.1	454.1	-23.97	53	61	0.729
rpg-1 int vs. rpg-2 dis	430.1	477.7	-47.62	53	61	1.449
rpg-1 dis vs. WT R108 pro	437.7	137.4	300.4	53	44	8.412
rpg-1 dis vs. WT R108 int	437.7	130	307.7	53	44	8.617
rpg-1 dis vs. WT R108 dis	437.7	156.1	281.7	53	44	7.888
rpg-1 dis vs. rpg-2 pro	437.7	389.2	48.56	53	61	1.477
rpg-1 dis vs. rpg-2 int	437.7	454.1	-16.34	53	61	0.4969
rpg-1 dis vs. rpg-2 dis	437.7	477.7	-39.99	53	61	1.216
WT R108 pro vs. WT R108 int	137.4	130	7.318	44	44	0.1961
WT R108 pro vs. WT R108 dis	137.4	156.1	-18.7	44	44	0.5011
WT R108 pro vs. rpg-2 pro	137.4	389.2	-251.8	44	61	7.272
WT R108 pro vs. rpg-2 int	137.4	454.1	-316.7	44	61	9.146
WT R108 pro vs. rpg-2 dis	137.4	477.7	-340.4	44	61	9.829
WT R108 int vs. WT R108 dis	130	156.1	-26.02	44	44	0.6971
WT R108 int vs. rpg-2 pro	130	389.2	-259.1	44	61	7.483
WT R108 int vs. rpg-2 int	130	454.1	-324	44	61	9.357
WT R108 int vs. rpg-2 dis	130	477.7	-347.7	44	61	10.04
WT R108 dis vs. rpg-2 pro	156.1	389.2	-233.1	44	61	6.732
WT R108 dis vs. rpg-2 int	156.1	454.1	-298	44	61	8.606
WT R108 dis vs. rpg-2 dis	156.1	477.7	-321.7	44	61	9.289
rpg-2 pro vs. rpg-2 int	389.2	454.1	-64.9	61	61	2.047
rpg-2 pro vs. rpg-2 dis	389.2	477.7	-88.56	61	61	2.793
rpg-2 int vs. rpg-2 dis	454.1	477.7	-23.66	61	61	0.7462
