# Supplementary material for: RPG acts as a central determinant for infectosome formation and cellular polarization during intracellular rhizobial infections
Source: eLife journal article supplement (doi:10.7554/elife.80741), 2023-02-22
Supplement: fig1-data2 [file Figure 1F - Nodular IT diameter.xlsx]

## Sheet: Values
Nodule IT diameter
WT A17		rpg-1
0.977	Plant 1	5.159	Plant 1
3.77	Plant 1	3.84	Plant 1
1.542	Plant 1	0.923	Plant 1
1.163	Plant 2	6.255	Plant 1
1.893	Plant 2	3.113	Plant 1
1.717	Plant 2	1.753	Plant 1
1.893	Plant 2	4.327	Plant 1
1.412	Plant 2	2.069	Plant 1
1.716	Plant 2	4.064	Plant 1
1.927	Plant 2	5.037	Plant 1
2.202	Plant 2	7.072	Plant 1
1.829	Plant 2	6.681	Plant 1
3.863	Plant 2	4.085	Plant 1
2.381	Plant 2	2.302	Plant 2
1.658	Plant 2	4.241	Plant 2
3.37	Plant 2	3.975	Plant 2
1.098	Plant 2	2.019	Plant 2
1.462	Plant 3	1.827	Plant 2
1.034	Plant 3	1.415	Plant 2
1.649	Plant 3	5.083	Plant 2
2.065	Plant 3	4.863	Plant 2
2.017	Plant 3	2.461	Plant 2
1.028	Plant 3	1.869	Plant 2
1.267	Plant 3	0.996	Plant 2
1.015	Plant 3	2.291	Plant 2
2.997	Plant 3	1.683	Plant 2
2.105	Plant 3	4.52	Plant 2
1.771	Plant 3	2.011	Plant 2
2.619	Plant 3	2.491	Plant 2
1.041	Plant 3	1.619	Plant 2
2.127	Plant 3	2.315	Plant 2
1.256	Plant 3	3.382	Plant 3
1.699	Plant 3	4.745	Plant 3
1.272	Plant 4	1.056	Plant 3
1.009	Plant 4	1.423	Plant 3
0.861	Plant 4	1.171	Plant 3
2.277	Plant 4	4.6	Plant 3
1.246	Plant 4	2.114	Plant 3
2.001	Plant 4	2.768	Plant 3
1.296	Plant 4	3.108	Plant 3
3.046	Plant 4	2.313	Plant 3
2.127	Plant 4	3.934	Plant 3
1.981	Plant 4	5.425	Plant 3
2.245	Plant 4	3.564	Plant 3
1.32	Plant 4	4.203	Plant 3
1.875	Plant 4	2.457	Plant 3
1.664	Plant 4	2.61	Plant 3
1.368	Plant 5	4.868	Plant 4
2.388	Plant 5	2.401	Plant 4
2.629	Plant 5	1.565	Plant 4
3.191	Plant 5	4.952	Plant 4
2.173	Plant 5	4.574	Plant 4
3.501	Plant 5	3.638	Plant 4
1.091	Plant 5	6.294	Plant 5
6.788	Plant 5	8.903	Plant 5
5.246	Plant 5	4.196	Plant 5
2.658	Plant 5	5.143	Plant 5
1.915	Plant 5	3.119	Plant 5
1.399	Plant 5	2.27	Plant 5
1.691	Plant 5	4.637	Plant 5
2.548	Plant 5	2.151	Plant 5
2.151	Plant 5	8.275	Plant 5
1.055	Plant 5	2.031	Plant 5
1.893	Plant 5	3.725	Plant 5
2.583	Plant 5	6.392	Plant 5
2.202	Plant 5	5.09	Plant 5
1.542	Plant 5	7.456	Plant 5
1.129	Plant 5	1.022	Plant 5
1.787	Plant 5	2.294	Plant 5
3.171	Plant 5	2.972	Plant 5
2.623	Plant 5
3.417	Plant 5
3.512	Plant 5
3.382	Plant 5
1.79	Plant 5
1.618	Plant 5
2.349	Plant 5
2.014	Plant 5
3.06	Plant 5
1.598	Plant 5
1.193	Plant 5
2.567	Plant 6
1.455	Plant 6
0.98	Plant 6
4.021	Plant 6
2.511	Plant 6
2.47	Plant 6
2.011	Plant 6
2.827	Plant 6
3.521	Plant 6

## Sheet: Mann-Whitney
Column B	rpg-1 IT Diameter
vs.	vs,
Column A	WT A17 IT Diameter
Mann Whitney test
P value	<0,0001
Exact or approximate P value?	Exact
P value summary	****
Significantly different (P < 0.05)?	Yes
One- or two-tailed P value?	Two-tailed
Sum of ranks in column A,B	5663 , 7218
Mann-Whitney U	1568
Difference between medians
Median of column A	1,921, n=90
Median of column B	3,251, n=70
Difference: Actual	1.33
Difference: Hodges-Lehmann	1.207
