# Supplementary material for: RPG acts as a central determinant for infectosome formation and cellular polarization during intracellular rhizobial infections
Source: eLife journal article supplement (doi:10.7554/elife.80741), 2023-02-22
Supplement: fig1-figsupp1-data1 [file elife-80741-fig1-figsupp1-data1-v2.zip]

## Sheet: Values
WT A17				rpg-1				WT R108				rpg-2
Plant	RH	Length (um)		Plant	RH	Length (um)		Plant	RH	Length (um)		Plant	RH	Length (um)
1	1	13.172		1	1	10.566		1	1	11.991		1	1	11.893
	2	14.165			2	11.557			2	12.689			2	12.891
	3	11.366			3	11.686			3	10.898			3	10.572
	4	13.523			4	12.841			4	11.716			4	11.565
	5	13.537			5	11.742			5	12.717			5	10.838
2	1	12.987		2	1	13.08		2	1	12.201		2	1	13.679
	2	13.788			2	12.248			2	13.534			2	13.075
	3	11.763			3	12.354			3	13.806			3	12.302
	4	12.924			4	11.435			4	14.6			4	12.595
	5	13.406			5	11.37			5	12.553			5	11.477
3	1	12.509		3	1	12.858		3	1	12.2		3	1	12.298
	2	12.806			2	13.238			2	11.031			2	11.296
	3	11.646			3	13.347			3	11.099			3	11.012
	4	11.291			4	11.516			4	12.844			4	13.726
	5	12.14			5	10.959			5	12.844			5	11.839
4	1	11.709		4	1	11.709		4	1	12.509		4	1	9.303
	2	12.482			2	11.485			2	10.44			2	10.344
	3	13.238			3	12.02			3	13.599			3	11.231
	4	12.806			4	11.686			4	10.608			4	11.961
	5	11.603			5	11.716			5	12.2			5	9.92
5	1	13.955		5	1	13.095		5	1	11.493		5	1	13.517
	2	13.325			2	10.228			2	11.441			2	11.534
	3	13.381			3	11.825			3	10.934			3	10.186
	4	12.382			4	13.821			4	10.4			4	13.267
	5	11.839			5	12.733			5	10.453			5	10.108
6	1	11.839		6	1	11.763		6	1	11.046		6	1	11.099
	2	11.55			2	13.782			2	10.454			2	12.194
	3	10.677			3	13.921			3	10.863			3	12.924
	4	10.4			4	12.964			4	10.016			4	12.204
	5	11.127			5	10.934			5	11.888			5	14.029
7	1	11.685		7	1	11.947		7	1	11.141		7	1	12.524
	2	11.29			2	11.686			2	12.345			2	12.248
	3	11.543			3	11.897			3	11.377			3	11.043
	4	10.65			4	12.073			4	12.595			4	12.252
	5	12.37			5	10.545			5	12.841			5	11.948
8	1	11.084		8	1	11.645		8	1	11.065		8	1	12.349
	2	12.524			2	11.628			2	13.111			2	13.172
	3	12.182			3	10.92			3	12.64			3	9.763
	4	12.053			4	11.872			4	9.145			4	11.637
	5	11.095			5	10.992			5	11.231			5	11.761
9	1	11.18		9	1	9.88		9	1	11.162		9	1	11.018
	2	11.744			2	14.207			2	11.793			2	12.775
	3	10.315			3	12.244			3	11.893			3	10.92
	4	9.928			4	11.149			4	10.95			4	13.621
	5	10.005			5	12.795			5	12.926			5	11.084
10	1	10.566		10	1	10.92		10	1	12.686		10	1	15.276
	2	11.377			2	10.95			2	11.696			2	13.288
	3	10.029			3	11.485			3	10.279			3	12.354
	4	11.95			4	10.118			4	10.234			4	12.717
	5	10.228			5	9.616			5	10.019			5	11.55
11	1	11.56		11	1	13.166		11	1	12.182		11	1	12.397
	2	12.686			2	12.509			2	11.986			2	13.788
	3	11.347			3	13.02			3	9.913			3	12.536
	4	11.947			4	11.137			4	12.073			4	11.477
	5	11.3			5	11.212			5	11.283			5	12.863
12	1	12.122		12	1	13.561		12	1	12.024		12	1	13.782
	2	10.992			2	11.724			2	12.397			2	13.325
	3	11.259			3	10.756			3	11.088			3	11.831
	4	10.688			4	11.141			4	10.046			4	12.524
	5	12.608			5	11.265			5	12.377			5	12.836
13	1	12.979		13	1	11.046		13	1	10.279		13	1	9.813
	2	12.252			2	11.046			2	10.589			2	12.733
	3	12.354			3	11.98			3	12.29			3	10.337
	4	12.03			4	12.712			4	12.035			4	11.405
	5	11.028			5	10.539			5	11.696			5	10.609
14	1	11.628		14	1	12.349		14	1	12.733		14	1	13.806
	2	10.608			2	10.273			2	10.688			2	12.686
	3	10.896			3	11.454			3	12.482			3	12.545
	4	11.485			4	10.453			4	12.073			4	13.221
	5	12.09			5	12.712			5	11.091			5	13.648
15	1	11.588		15	1	13.648		15	1	11.825		15	1	13.648
	2	11.046			2	13.483			2	11.897			2	11.537
	3	11.399			3	11.628			3	11.543			3	10.577
	4	11.991			4	10.992			4	12.67			4	11.189
	5	9.302			5	11.763			5	11.735			5	12.397
16	1	11.399		16	1	12.254		16	1	13.256		16	1	11.112
	2	12.024			2	10.835			2	11.265			2	9.373
	3	12.073			3	12.994			3	12.795			3	10.046
	4	12.073			4	12.209			4	12.008			4	10.407
	5	10.4			5	12.024			5	10.4			5	11.614
17	1	11.622		17	1	12.37		17	1	12.024		17	1	12.733
	2	13.677			2	11.628			2	13.156			2	11.283
	3	11.888			3	11.468			3	11.283			3	11.353
	4	11.839			4	12.073			4	12.482			4	11.658
	5	11.283			5	11.189			5	12.354			5	10.896
18	1	14.695		18	1	11.218		18	1	13.075		18	1	11.399
	2	11.312			2	10.884			2	12.008			2	12.397
	3	13.004			3	11.212			3	10.196			3	11.897
	4	12.795			4	11.399			4	10.992			4	10.884
	5	12.327			5	11.713			5	11.312			5	11.735
19	1	13.821		19	1	11.696		19	1	10.4		19	1	12.841
	2	9.422			2	9.795			2	11.064			2	12.54
	3	11.793			3	12.76			3	13.399			3	12.686
	4	13.201			4	11.447			4	10.476			4	11.761
	5	10.92			5	11.943			5	11.605			5	12.608
20	1	13.221		20	1	11.605						20	1	13.08
	2	12.397			2	10.756							2	11.735
	3	13.821			3	11.468							3	11.645
	4	11.98			4	12.686							4	11.858
	5	11.854			5	12.897							5	12.897
21	1	11.645		21	1	12.482
	2	11.673			2	11.353
	3	11.825			3	11.112
	4	12.686			4	12.397
	5	11.645			5	10.902

## Sheet: Kruskal-Wallis
Kruskal-Wallis test
P value	0.285
Exact or approximate P value?	Approximate
P value summary	ns
Do the medians vary signif. (P < 0.05)?	No
Number of groups	4
Kruskal-Wallis statistic	3.79
Data summary
Number of treatments (columns)	4
Number of values (total)	405
Number of families	1
Number of comparisons per family	6
Alpha	0.05
Dunn's multiple comparisons test	Mean rank diff,	Significant?	Summary	Adjusted P Value
A17 WT vs. rpg-1	14.02	No	ns	>0,9999	A-B
A17 WT vs. WT R108	20.22	No	ns	>0,9999	A-D
A17 WT vs. rpg-2	-8.899	No	ns	>0,9999	A-E
rpg-1 vs. WT R108	6.204	No	ns	>0,9999	B-D
rpg-1 vs. rpg-2	-22.92	No	ns	0.9669	B-E
WT R108 vs. rpg-2	-29.12	No	ns	0.4949	D-E
Test details	Mean rank 1	Mean rank 2	Mean rank diff,	n1	n2	Z
A17 WT vs. rpg-1	209.2	195.2	14.02	105	105	0.8678
A17 WT vs. WT R108	209.2	189	20.22	105	95	1.22
A17 WT vs. rpg-2	209.2	218.1	-8.899	105	100	0.5441
rpg-1 vs. WT R108	195.2	189	6.204	105	95	0.3743
rpg-1 vs. rpg-2	195.2	218.1	-22.92	105	100	1.401
WT R108 vs. rpg-2	189	218.1	-29.12	95	100	1.736
