# Supplementary material for: RPG acts as a central determinant for infectosome formation and cellular polarization during intracellular rhizobial infections
Source: eLife journal article supplement (doi:10.7554/elife.80741), 2023-02-22
Supplement: fig1-figsupp2-data1 [file elife-80741-fig1-figsupp2-data1-v2.zip]

## Sheet: Values
WT A17								rpg-1								WT R108								rpg-2
	nod WT A17	nod inf WT A17	empty WT A17	inf elong WT A17	inf round WT A17	bumps WT A17			nod rpg-1	nod inf rpg-1	empty rpg-1	inf elong rpg-1	inf round rpg-1	bumps rpg-1			nod WT R108	nod inf WT R108	empty WT R108	inf elong WT R108	inf round WT R108	bumps WT R108			nod rpg-2	nod inf rpg-2	empty rpg-2	inf elong rpg-2	inf round rpg-2	bumps rpg-2
plant 1	23	23	0	6	17	0		plant 1	0	0	0	0	0	0		plant 1	20	20	0	8	12	0		plant 1	21	11	8	0	11	2
plant 2	10	9	1	3	6	0		plant 2	11	0	0	0	0	11		plant 2	13	12	1	3	9	0		plant 2	2	0	0	0	0	2
plant 3	8	8	0	1	7	0		plant 3	3	0	0	0	0	3		plant 3	16	13	3	12	1	0		plant 3	0	0	0	0	0	0
plant 4	4	4	0	0	4	0		plant 4	4	1	1	0	1	2		plant 4	3	3	0	0	3	0		plant 4	0	0	0	0	0	0
plant 5	12	12	0	2	10	0		plant 5	6	2	0	0	2	4		plant 5	21	21	0	3	18	0		plant 5	4	0	3	0	0	1
plant 6	20	20	0	3	17	0		plant 6	8	4	1	0	4	3		plant 6	8	8	0	8	0	0		plant 6	0	0	0	0	0	0
plant 7	3	0	3	0	0	0		plant 7	11	0	0	0	0	11		plant 7	11	7	4	5	2	0		plant 7	0	0	0	0	0	0
plant 8	1	0	1	0	0	0		plant 8	0	0	0	0	0	0		plant 8	16	16	0	15	1	0		plant 8	0	0	0	0	0	0
plant 9	0	0	0	0	0	0										plant 9	11	10	1	10	0	0		plant 9	3	0	0	0	0	3
plant 10	21	20	1	5	15	0										plant 10	0	0	0	0	0	0		plant 10	7	0	0	0	0	7
plant 11	27	26	1	20	6	0										plant 11	5	4	1	4	0	0		plant 11	3	1	0	0	1	2
plant 12	18	17	1	9	8	0										plant 12	6	6	0	6	0	0		plant 12	1	1	0	0	1	0
plant 13	15	15	0	8	7	0										plant 13	1	1	0	0	1	0		plant 13	0	0	0	0	0	0
plant 14	14	9	5	0	9	0										plant 14	11	11	0	8	3	0		plant 14	0	0	0	0	0	0
plant 15	12	12	0	2	10	0										plant 15	11	1	10	1	0	0		plant 15	0	0	0	0	0	0
plant 16	3	3	0	2	1	0										plant 16	18	17	1	15	2	0		plant 16	0	0	0	0	0	0
plant 17	7	5	2	3	2	0										plant 17	0	0	0	0	0	0		plant 17	1	1	0	0	1	0
plant 18	12	12	0	4	8	0
plant 19	8	8	0	8	0	0
plant 20	9	9	0	3	6	0

## Sheet: Mann-Whitney
Mann-Whitney test
nod					nod inf					inf round					inf elong					bumps					empty
A17		R108			A17		R108			A17		R108			A17		R108			A17		R108			A17		R108
Column S	nod rpg-1	Column G	nod rpg-2		Column T	nod inf rpg-1	Column H	nod inf rpg-2		Column W	inf round rpg-1	Column K	inf round rpg-2		Column V	inf elong rpg-1	Column J	inf elong rpg-2		Column X	bumps rpg-1	Column L	bumps rpg-2		Column U	empty rpg-1	Column I	empty rpg-2
vs.	vs,	vs.	vs,		vs.	vs,	vs.	vs,		vs.	vs,	vs.	vs,		vs.	vs,	vs.	vs,		vs.	vs,	vs.	vs,		vs.	vs,	vs.	vs,
Column M	nod WT A17	Column A	nod WT R108		Column N	nod inf WT A17	Column B	nod inf WT R108		Column Q	inf round WT A17	Column E	inf round WT R108		Column P	inf elong WT A17	Column D	inf elong WT R108		Column R	bumps WT A17	Column F	bumps WT R108		Column O	empty WT A17	Column C	empty WT R108
Mann Whitney test		Mann Whitney test			Mann Whitney test		Mann Whitney test			Mann Whitney test		Mann Whitney test			Mann Whitney test		Mann Whitney test			Mann Whitney test		Mann Whitney test			Mann Whitney test		Mann Whitney test
P value	0.0436	P value	0.0006		P value	0.0007	P value	<0,0001		P value	0.0043	P value	0.0225		P value	0.0009	P value	<0,0001		P value	<0,0001	P value	0.0184		P value	0.4569	P value	0.1035
Exact or approximate P value?	Exact	Exact or approximate P value?	Exact		Exact or approximate P value?	Exact	Exact or approximate P value?	Exact		Exact or approximate P value?	Exact	Exact or approximate P value?	Exact		Exact or approximate P value?	Exact	Exact or approximate P value?	Exact		Exact or approximate P value?	Exact	Exact or approximate P value?	Exact		Exact or approximate P value?	Exact	Exact or approximate P value?	Exact
P value summary	*	P value summary	***		P value summary	***	P value summary	****		P value summary	**	P value summary	*		P value summary	***	P value summary	****		P value summary	****	P value summary	*		P value summary	ns	P value summary	ns
Significantly different (P < 0.05)?	Yes	Significantly different (P < 0.05)?	Yes		Significantly different (P < 0.05)?	Yes	Significantly different (P < 0.05)?	Yes		Significantly different (P < 0.05)?	Yes	Significantly different (P < 0.05)?	Yes		Significantly different (P < 0.05)?	Yes	Significantly different (P < 0.05)?	Yes		Significantly different (P < 0.05)?	Yes	Significantly different (P < 0.05)?	Yes		Significantly different (P < 0.05)?	No	Significantly different (P < 0.05)?	No
One- or two-tailed P value?	Two-tailed	One- or two-tailed P value?	Two-tailed		One- or two-tailed P value?	Two-tailed	One- or two-tailed P value?	Two-tailed		One- or two-tailed P value?	Two-tailed	One- or two-tailed P value?	Two-tailed		One- or two-tailed P value?	Two-tailed	One- or two-tailed P value?	Two-tailed		One- or two-tailed P value?	Two-tailed	One- or two-tailed P value?	Two-tailed		One- or two-tailed P value?	Two-tailed	One- or two-tailed P value?	Two-tailed
Sum of ranks in column M,S	329,5 , 76,50	Sum of ranks in column A,G	391,5 , 203,5		Sum of ranks in column N,T	352 , 54	Sum of ranks in column B,H	409,5 , 185,5		Sum of ranks in column Q,W	343,5 , 62,50	Sum of ranks in column E,K	356 , 239		Sum of ranks in column P,V	350 , 56	Sum of ranks in column D,J	408 , 187		Sum of ranks in column R,X	230 , 176	Sum of ranks in column F,L	246,5 , 348,5		Sum of ranks in column O,U	305 , 101	Sum of ranks in column C,I	336,5 , 258,5
Mann-Whitney U	40.5	Mann-Whitney U	50.5		Mann-Whitney U	18	Mann-Whitney U	32.5		Mann-Whitney U	26.5	Mann-Whitney U	86		Mann-Whitney U	20	Mann-Whitney U	34		Mann-Whitney U	20	Mann-Whitney U	93.5		Mann-Whitney U	65	Mann-Whitney U	105.5
Difference between medians		Difference between medians			Difference between medians		Difference between medians			Difference between medians		Difference between medians			Difference between medians		Difference between medians			Difference between medians		Difference between medians			Difference between medians		Difference between medians
Median of column M	11,00, n=20	Median of column A	11,00, n=17		Median of column N	9,000, n=20	Median of column B	8,000, n=17		Median of column Q	6,500, n=20	Median of column E	1,000, n=17		Median of column P	3,000, n=20	Median of column D	5,000, n=17		Median of column R	0,000, n=20	Median of column F	0,000, n=17		Median of column O	0,000, n=20	Median of column C	0,000, n=17
Median of column S	5,000, n=8	Median of column G	0,000, n=17		Median of column T	0,000, n=8	Median of column H	0,000, n=17		Median of column W	0,000, n=8	Median of column K	0,000, n=17		Median of column V	0,000, n=8	Median of column J	0,000, n=17		Median of column X	3,000, n=8	Median of column L	0,000, n=17		Median of column U	0,000, n=8	Median of column I	0,000, n=17
Difference: Actual	-6	Difference: Actual	-11		Difference: Actual	-9	Difference: Actual	-8		Difference: Actual	-6.5	Difference: Actual	-1		Difference: Actual	-3	Difference: Actual	-5		Difference: Actual	3	Difference: Actual	0		Difference: Actual	0	Difference: Actual	0
Difference: Hodges-Lehmann	-5.5	Difference: Hodges-Lehmann	-8		Difference: Hodges-Lehmann	-9	Difference: Hodges-Lehmann	-7		Difference: Hodges-Lehmann	-6	Difference: Hodges-Lehmann	-1		Difference: Hodges-Lehmann	-3	Difference: Hodges-Lehmann	-5		Difference: Hodges-Lehmann	3	Difference: Hodges-Lehmann	0		Difference: Hodges-Lehmann	0	Difference: Hodges-Lehmann	0
