# Supplementary material for: RPG acts as a central determinant for infectosome formation and cellular polarization during intracellular rhizobial infections
Source: eLife journal article supplement (doi:10.7554/elife.80741), 2023-02-22
Supplement: fig2-data1 [file Figure 2C - IT diameter.xlsx]

## Sheet: Values
EV (WT A17)					EV (rpg-1)					RPG-FL					RPG-CC					RPG-tCC					RPG-NT
	EV (WT A17) Pro	EV (WT A17) Int	EV (WT A17) Dis			EV (rpg-1) Pro	EV (rpg-1) Int	EV (rpg-1) Dis			RPG-FL Pro	RPG-FL Int	RPG-FL Dis			RPG-CC Pro	RPG-CC Int	RPG-CC Dis			RPG-tCC Pro	RPG-tCC Int	RPG-tCC Dis			RPG-NT Pro	RPG-NT Int	RPG-NT Dis
plant 1	1.127	0.76	1.208		plant 1	3.203	5.191	3.633		plant 1	0.77	0.907	2.18		plant 1	0.995	1.12	0.889		plant 1	2.458	3.227	3.809		plant 1	3.609	6.504	2.941
plant 1	1.071	1.279	1.12		plant 1	1.528	2.892	4.13		plant 1	1.401	1.07	1.537		plant 1	0.837	0.827	0.781		plant 1	2.899	2.817	6.222		plant 1	1.834	2.612	2.258
plant 1	1.255	1.069	0.684		plant 1	1.521	3.117	3.804		plant 1	0.823	1.336	1.562		plant 1	1.133	1.299	1.69		plant 1	2.53	3.12	3.13		plant 1	4.302	2.745	2.568
plant 1	1.051	0.823	1.199		plant 1	1.291	3.559	1.58		plant 1	0.941	1.367	1.591		plant 1	1.097	2.617	1.033		plant 1	4.022	3.636	2.577		plant 1	2.692	3.099	7.135
plant 2	1.154	1.574	1.776		plant 2	1.458	1.316	3.029		plant 2	2.105	4.214	3.359		plant 2	2.193	3.092	2.808		plant 2	2.737	8.222	4.207		plant 2	2.835	2.339	2.642
plant 2	0.625	0.914	1.345		plant 2	1.665	1.675	3.044		plant 2	1.372	1.31	2.397		plant 2	3.331	2.687	3.247		plant 2	3.102	4.721	2.533		plant 2	2.195	2.607	3.972
plant 2	0.954	1.465	1.709		plant 2	3.023	5.316	2.818		plant 2	0.906	1.517	1.443		plant 2	1.806	5.504	3.701		plant 2	1.98	3.245	4.413		plant 2	6.898	5.305	7.101
plant 2	1.097	0.751	0.954		plant 2	1.468	2.429	3.281		plant 2	1.011	2.057	0.961		plant 2	0.882	4.369	4.411		plant 2	3.604	1.976	3.332		plant 2	2.028	2.812	3.161
plant 3	0.648	1.394	2.231		plant 3	1.802	3.356	2.562		plant 3	0.723	0.686	0.787		plant 3	0.809	1.454	1.023		plant 3	3.156	2.409	3.213		plant 3	0.668	1.398	1.825
plant 3	0.974	1.223	1.135		plant 3	2.858	2.848	4.187		plant 3	0.996	1.888	1.036		plant 3	0.95	1.179	1.47		plant 3	1.86	2.295	2.279		plant 3	2.2	2.21	3.404
plant 3	0.82	0.917	1.542		plant 3	2.667	4.002	2.852		plant 3	1.318	1.285	1.109		plant 3	1.354	1.534	1.234		plant 3	1.287	1.829	4.298		plant 3	3.241	2.515	4.223
plant 3	0.964	1.627	1.327		plant 3	2.341	3.025	2.283		plant 3	1.425	1.296	0.693		plant 3	0.829	3.885	2.829		plant 3	3.336	3.947	3.278		plant 3	2.331	3.657	2.557
plant 4	1.014	1.18	0.781		plant 4	2.645	4.487	3.406		plant 4	0.605	1.109	1.095		plant 4	1.692	0.87	1.155		plant 4	1.441	2.109	3.767		plant 4	2.893	4.628	5.737
plant 4	1.218	1.269	1.233		plant 4	4.808	0.793	3.621		plant 4	1.022	1.084	0.824		plant 4	0.878	1.562	1.482		plant 4	1.926	2.678	2.234		plant 4	2.374	4.486	8.077
plant 4	0.631	1.507	1.556		plant 4	0.924	3.999	2.929		plant 4	0.785	1.173	1.192		plant 4	0.799	1.507	1.028		plant 4	1.848	3.376	3.448		plant 4	2.802	2.407	3.471
plant 4	0.56	0.856	1.284		plant 4	2.423	2.72	5.196		plant 4	0.827	1.219	1.232		plant 4	1.556	0.766	6.038		plant 4	1.384	0.678	1.963		plant 4	1.908	3.39	6.648
plant 5	0.921	0.729	0.748		plant 5	1.889	2.997	2.872		plant 5	1.098	0.934	0.841		plant 5	1.181	1.681	1.357		plant 5	4.274	3.753	3.711		plant 5	1.822	3.193	2.402
plant 5	0.727	0.791	1.345		plant 5	2.486	3.558	5.839		plant 5	0.718	1.475	1.453		plant 5	0.74	1.089	1.35		plant 5	2.05	3.745	4.21		plant 5	2.616	4.585	6.051
plant 5	0.852	1.737	1.653		plant 5	2.449	4.931	5.084		plant 5	1.338	1.333	0.91		plant 5	1.72	1.134	1.603		plant 5	2.261	7.13	7.719		plant 5	2.816	1.414	2.572
plant 5	1.124	1.504	0.824		plant 5	3.049	3.869	4.885		plant 5	1.116	1.69	1.627		plant 5	1.273	1.465	2.44		plant 5	2.177	2.35	5.61		plant 5	1.627	4.105	2.951
					plant 6	1.941	3.462	3.265		plant 6	1.005	1.015	1.507		plant 6	1.086	1.088	3.242		plant 6	2.064	2.44	2.413		plant 6	2.549	2.62	6.102
					plant 6	1.662	1.646	2.854		plant 6	0.679	1.179	1.491		plant 6	1.468	2.56	3.268		plant 6	1.725	2.803	6.801		plant 6	3.078	10.249	4.327
					plant 6	0.905	3.294	3.294		plant 6	0.911	0.859	0.916		plant 6	1.611	1.557	1.239		plant 6	1.604	3.033	7.747		plant 6	1.85	3.117	1.789
					plant 6	2.447	3.243	3.64		plant 6	0.627	1.328	0.83		plant 6	1.208	1.417	2.331		plant 6	1.867	3.484	4.212		plant 6	2.073	2.996	3.786
										plant 7	0.821	1.141	1.446		plant 7	0.906	1.013	1.488							plant 7	3.272	3.892	3.109
										plant 7	0.82	0.992	1.066		plant 7	2.704	3.489	4.023							plant 7	2.336	4.702	4.46
										plant 7	1.708	1.195	0.722		plant 7	1.402	1.656	1.381							plant 7	3.295	3.034	4.983
										plant 7	0.803	1.024	1.691		plant 7	1.052	1.241	1.41							plant 7	2.482	4.388	4.312
															plant 8	1.267	3.326	1.72
															plant 8	0.947	1.153	5.042
															plant 8	1.004	1.118	5.087
															plant 8	1.075	1.384	1.937

## Sheet: Kruskal-Wallis
Proximal								Intermediate								Distal
Kruskal-Wallis test								Kruskal-Wallis test								Kruskal-Wallis test
P value	<0,0001							P value	<0,0001							P value	<0,0001
Exact or approximate P value?	Approximate							Exact or approximate P value?	Approximate							Exact or approximate P value?	Approximate
P value summary	****							P value summary	****							P value summary	****
Do the medians vary signif. (P < 0.05)?	Yes							Do the medians vary signif. (P < 0.05)?	Yes							Do the medians vary signif. (P < 0.05)?	Yes
Number of groups	6							Number of groups	6							Number of groups	6
Kruskal-Wallis statistic	91.05							Kruskal-Wallis statistic	77.62							Kruskal-Wallis statistic	88.69
Data summary								Data summary								Data summary
Number of treatments (columns)	6							Number of treatments (columns)	6							Number of treatments (columns)	6
Number of values (total)	156							Number of values (total)	156							Number of values (total)	156
Number of families	1							Number of families	1							Number of families	1
Number of comparisons per family	15							Number of comparisons per family	15							Number of comparisons per family	15
Alpha	0.05							Alpha	0.05							Alpha	0.05
Dunn's multiple comparisons test	Mean rank diff,	Significant?	Summary	Adjusted P Value				Dunn's multiple comparisons test	Mean rank diff,	Significant?	Summary	Adjusted P Value				Dunn's multiple comparisons test	Mean rank diff,	Significant?	Summary	Adjusted P Value
EV (WT A17) Pro vs. EV (rpg-1) Pro	-68.22	Yes	****	<0,0001				EV (WT A17) Int vs. EV (rpg-1) Int	-74.92	Yes	****	<0,0001				EV (WT A17) Dis vs. EV (rpg-1) Dis	-73.15	Yes	****	<0,0001
EV (WT A17) Pro vs. RPG-FL Pro	-3.593	No	ns	>0,9999				EV (WT A17) Int vs. RPG-FL Int	-7.132	No	ns	>0,9999				EV (WT A17) Dis vs. RPG-FL Dis	-1.668	No	ns	>0,9999
EV (WT A17) Pro vs. RPG-CC Pro	-23.62	No	ns	0.999				EV (WT A17) Int vs. RPG-CC Int	-28.35	No	ns	0.4152				EV (WT A17) Dis vs. RPG-CC Dis	-33.38	No	ns	0.1429
EV (WT A17) Pro vs. RPG-tCC Pro	-78.45	Yes	****	<0,0001				EV (WT A17) Int vs. RPG-tCC Int	-71.28	Yes	****	<0,0001				EV (WT A17) Dis vs. RPG-tCC Dis	-80.53	Yes	****	<0,0001
EV (WT A17) Pro vs. RPG-NT Pro	-84.38	Yes	****	<0,0001				EV (WT A17) Int vs. RPG-NT Int	-78.35	Yes	****	<0,0001				EV (WT A17) Dis vs. RPG-NT Dis	-80.01	Yes	****	<0,0001
EV (rpg-1) Pro vs. RPG-FL Pro	64.63	Yes	****	<0,0001				EV (rpg-1) Int vs. RPG-FL Int	67.79	Yes	****	<0,0001				EV (rpg-1) Dis vs. RPG-FL Dis	71.48	Yes	****	<0,0001
EV (rpg-1) Pro vs. RPG-CC Pro	44.6	Yes	**	0.0038				EV (rpg-1) Int vs. RPG-CC Int	46.57	Yes	**	0.002				EV (rpg-1) Dis vs. RPG-CC Dis	39.77	Yes	*	0.0167
EV (rpg-1) Pro vs. RPG-tCC Pro	-10.23	No	ns	>0,9999				EV (rpg-1) Int vs. RPG-tCC Int	3.646	No	ns	>0,9999				EV (rpg-1) Dis vs. RPG-tCC Dis	-7.375	No	ns	>0,9999
EV (rpg-1) Pro vs. RPG-NT Pro	-16.16	No	ns	>0,9999				EV (rpg-1) Int vs. RPG-NT Int	-3.426	No	ns	>0,9999				EV (rpg-1) Dis vs. RPG-NT Dis	-6.857	No	ns	>0,9999
RPG-FL Pro vs. RPG-CC Pro	-20.03	No	ns	>0,9999				RPG-FL Int vs. RPG-CC Int	-21.22	No	ns	>0,9999				RPG-FL Dis vs. RPG-CC Dis	-31.72	No	ns	0.1
RPG-FL Pro vs. RPG-tCC Pro	-74.86	Yes	****	<0,0001				RPG-FL Int vs. RPG-tCC Int	-64.14	Yes	****	<0,0001				RPG-FL Dis vs. RPG-tCC Dis	-78.86	Yes	****	<0,0001
RPG-FL Pro vs. RPG-NT Pro	-80.79	Yes	****	<0,0001				RPG-FL Int vs. RPG-NT Int	-71.21	Yes	****	<0,0001				RPG-FL Dis vs. RPG-NT Dis	-78.34	Yes	****	<0,0001
RPG-CC Pro vs. RPG-tCC Pro	-54.83	Yes	***	0.0001				RPG-CC Int vs. RPG-tCC Int	-42.92	Yes	**	0.0065				RPG-CC Dis vs. RPG-tCC Dis	-47.14	Yes	**	0.0017
RPG-CC Pro vs. RPG-NT Pro	-60.76	Yes	****	<0,0001				RPG-CC Int vs. RPG-NT Int	-49.99	Yes	***	0.0003				RPG-CC Dis vs. RPG-NT Dis	-46.62	Yes	***	0.001
RPG-tCC Pro vs. RPG-NT Pro	-5.929	No	ns	>0,9999				RPG-tCC Int vs. RPG-NT Int	-7.071	No	ns	>0,9999				RPG-tCC Dis vs. RPG-NT Dis	0.5179	No	ns	>0,9999
Test details	Mean rank 1	Mean rank 2	Mean rank diff,	n1	n2	Z		Test details	Mean rank 1	Mean rank 2	Mean rank diff,	n1	n2	Z		Test details	Mean rank 1	Mean rank 2	Mean rank diff,	n1	n2	Z
EV (WT A17) Pro vs. EV (rpg-1) Pro	35.3	103.5	-68.22	20	24	4.988		EV (WT A17) Int vs. EV (rpg-1) Int	34.85	109.8	-74.92	20	24	5.477		EV (WT A17) Dis vs. EV (rpg-1) Dis	33.35	106.5	-73.15	20	24	5.348
EV (WT A17) Pro vs. RPG-FL Pro	35.3	38.89	-3.593	20	28	0.2716		EV (WT A17) Int vs. RPG-FL Int	34.85	41.98	-7.132	20	28	0.5392		EV (WT A17) Dis vs. RPG-FL Dis	33.35	35.02	-1.668	20	28	0.1261
EV (WT A17) Pro vs. RPG-CC Pro	35.3	58.92	-23.62	20	32	1.834		EV (WT A17) Int vs. RPG-CC Int	34.85	63.2	-28.35	20	32	2.202		EV (WT A17) Dis vs. RPG-CC Dis	33.35	66.73	-33.38	20	32	2.592
EV (WT A17) Pro vs. RPG-tCC Pro	35.3	113.8	-78.45	20	24	5.735		EV (WT A17) Int vs. RPG-tCC Int	34.85	106.1	-71.28	20	24	5.211		EV (WT A17) Dis vs. RPG-tCC Dis	33.35	113.9	-80.53	20	24	5.887
EV (WT A17) Pro vs. RPG-NT Pro	35.3	119.7	-84.38	20	28	6.379		EV (WT A17) Int vs. RPG-NT Int	34.85	113.2	-78.35	20	28	5.923		EV (WT A17) Dis vs. RPG-NT Dis	33.35	113.4	-80.01	20	28	6.049
EV (rpg-1) Pro vs. RPG-FL Pro	103.5	38.89	64.63	24	28	5.143		EV (rpg-1) Int vs. RPG-FL Int	109.8	41.98	67.79	24	28	5.394		EV (rpg-1) Dis vs. RPG-FL Dis	106.5	35.02	71.48	24	28	5.688
EV (rpg-1) Pro vs. RPG-CC Pro	103.5	58.92	44.6	24	32	3.656		EV (rpg-1) Int vs. RPG-CC Int	109.8	63.2	46.57	24	32	3.817		EV (rpg-1) Dis vs. RPG-CC Dis	106.5	66.73	39.77	24	32	3.26
EV (rpg-1) Pro vs. RPG-tCC Pro	103.5	113.8	-10.23	24	24	0.7844		EV (rpg-1) Int vs. RPG-tCC Int	109.8	106.1	3.646	24	24	0.2796		EV (rpg-1) Dis vs. RPG-tCC Dis	106.5	113.9	-7.375	24	24	0.5655
EV (rpg-1) Pro vs. RPG-NT Pro	103.5	119.7	-16.16	24	28	1.286		EV (rpg-1) Int vs. RPG-NT Int	109.8	113.2	-3.426	24	28	0.2726		EV (rpg-1) Dis vs. RPG-NT Dis	106.5	113.4	-6.857	24	28	0.5456
RPG-FL Pro vs. RPG-CC Pro	38.89	58.92	-20.03	28	32	1.713		RPG-FL Int vs. RPG-CC Int	41.98	63.2	-21.22	28	32	1.815		RPG-FL Dis vs. RPG-CC Dis	35.02	66.73	-31.72	28	32	2.713
RPG-FL Pro vs. RPG-tCC Pro	38.89	113.8	-74.86	28	24	5.957		RPG-FL Int vs. RPG-tCC Int	41.98	106.1	-64.14	28	24	5.104		RPG-FL Dis vs. RPG-tCC Dis	35.02	113.9	-78.86	28	24	6.275
RPG-FL Pro vs. RPG-NT Pro	38.89	119.7	-80.79	28	28	6.691		RPG-FL Int vs. RPG-NT Int	41.98	113.2	-71.21	28	28	5.898		RPG-FL Dis vs. RPG-NT Dis	35.02	113.4	-78.34	28	28	6.488
RPG-CC Pro vs. RPG-tCC Pro	58.92	113.8	-54.83	32	24	4.494		RPG-CC Int vs. RPG-tCC Int	63.2	106.1	-42.92	32	24	3.518		RPG-CC Dis vs. RPG-tCC Dis	66.73	113.9	-47.14	32	24	3.864
RPG-CC Pro vs. RPG-NT Pro	58.92	119.7	-60.76	32	28	5.197		RPG-CC Int vs. RPG-NT Int	63.2	113.2	-49.99	32	28	4.276		RPG-CC Dis vs. RPG-NT Dis	66.73	113.4	-46.62	32	28	3.988
RPG-tCC Pro vs. RPG-NT Pro	113.8	119.7	-5.929	24	28	0.4718		RPG-tCC Int vs. RPG-NT Int	106.1	113.2	-7.071	24	28	0.5627		RPG-tCC Dis vs. RPG-NT Dis	113.9	113.4	0.5179	24	28	0.04121

## Sheet: Mann-Whitney
Proximal			Intermediate			Distal
	RPG-CC Pro			RPG-CC Int			RPG-CC Dis
	vs,			vs,			vs,
	RPG-FL Pro			RPG-FL Int			RPG-FL Dis
Mann Whitney test			Mann Whitney test			Mann Whitney test
P value	0.0142		P value	0.037		P value	0.0031
Exact or approximate P value?	Exact		Exact or approximate P value?	Exact		Exact or approximate P value?	Exact
P value summary	*		P value summary	*		P value summary	**
Significantly different (P < 0.05)?	Yes		Significantly different (P < 0.05)?	Yes		Significantly different (P < 0.05)?	Yes
One- or two-tailed P value?	Two-tailed		One- or two-tailed P value?	Two-tailed		One- or two-tailed P value?	Two-tailed
Sum of ranks in column C,D	689,5 , 1141		Sum of ranks in column K,L	713,5 , 1117		Sum of ranks in column S,T	657 , 1173
Mann-Whitney U	283.5		Mann-Whitney U	307.5		Mann-Whitney U	251
Difference between medians			Difference between medians			Difference between medians
Median of column C	0,9260, n=28		Median of column K	1,207, n=28		Median of column S	1,212, n=28
Median of column D	1,115, n=32		Median of column L	1,460, n=32		Median of column T	1,647, n=32
Difference: Actual	0.189		Difference: Actual	0.2525		Difference: Actual	0.4345
Difference: Hodges-Lehmann	0.1895		Difference: Hodges-Lehmann	0.224		Difference: Hodges-Lehmann	0.5275
