# Supplementary material for: RPG acts as a central determinant for infectosome formation and cellular polarization during intracellular rhizobial infections
Source: eLife journal article supplement (doi:10.7554/elife.80741), 2023-02-22
Supplement: fig3-data1 [file Figure 3 -source data 1.xlsx]

## Sheet: panel 3D_FLIM fit values
Figure 3D - focal plane 1	Number	Channel	Region	Tail Offset Cnts	Amplitude 1 kCnts	Amplitude 2 kCnts	Lifetime (τ) 1 ns	Lifetime (τ) 2 ns	IRF Background Cnts	IRF Shift ns	Intensity 1 kCnts	Intensity 2 kCnts	Sum Amplitudes kCnts	Sum Intensity kCnts	Mean τ, Intensity Weighted ns	Mean τ, Amplitude Weighted ns	χ²
	1	HyD 4_1	Overall Decay	10304.8	152.695	42.6011	0.331425	2.5313	0	0	521.884	1112	195.296	1633.88	1.82863	0.811297	6.46461
	2	HyD 4_2	Overall Decay	20569.2	103.752	68.8884	0.302565	1.38619	0	0	323.728	984.585	172.641	1308.31	1.11806	0.734962	2.07331
Figure 3D - focal plane 2	Number	Channel	Region	Tail Offset Cnts	Amplitude 1 kCnts	Amplitude 2 kCnts	Lifetime (τ) 1 ns	Lifetime (τ) 2 ns	IRF Background Cnts	IRF Shift ns	Intensity 1 kCnts	Intensity 2 kCnts	Sum Amplitudes kCnts	Sum Intensity kCnts	Mean τ, Intensity Weighted ns	Mean τ, Amplitude Weighted ns	χ²
	1	HyD 4_1	Overall Decay	10678.6	129.948	38.0953	0.333484	2.53338	0	0	446.898	995.197	168.043	1442.1	1.85164	0.832198	5.04449
	2	HyD 4_2	Overall Decay	20370.7	87.0684	48.2589	0.302908	1.38033	0	0	271.978	686.829	135.327	958.807	1.07471	0.687127	1.16252

## Sheet: panel 3E_values
Intensity profile
Distance (micron)	Gray value GFP	Gray value mCherry
0	40.613	4.0623
0.1342	38.033	9.5437
0.2685	38.747	6.4397
0.4027	37.021	5.5548
0.5369	38.093	11.659
0.6711	44.548	8.6979
0.8054	52.694	7.663
0.9396	60.067	12.0198
1.0738	65.931	9.6693
1.2081	74.473	19.5389
1.3423	87.212	26.8593
1.4765	113.753	33.3003
1.6107	118.316	65.4506
1.745	131.588	66.8395
1.8792	137.748	67.5927
2.0134	142.489	86.5088
2.1477	109.32	49.4872
2.2819	85.621	32.3568
2.4161	53.027	29.6382
2.5503	60.174	17.1944
2.6846	50.876	14.6
2.8188	55.867	14.9378
2.953	53.132	13.7428
3.0872	50.887	13.5791
3.2215	44.714	6.3276
3.3557	49.153	10.8945
3.4899	54.928	10.6538
3.6242	51.838	11.3355
3.7584	50.267	11.2945
3.8926	49.205	12.2785
4.0268	43.813	10.5484
4.1611	42.885	15.4992
4.2953	39.572	7.3394
4.4295	37.663	13.1099
4.5638	39.155	15.7687
4.698	46.66	9.1017
4.8322	43.621	11.7964
4.9664	38.117	10.5397
5.1007	42.789	7.2601
5.2349	47.714	8.5931
5.3691	50.399	8.452
5.5034	48.73	10.1681
5.6376	43.949	11.4215
5.7718	43.44	12.4715
5.906	37.874	16.5784
6.0403	43.378	10.7266
6.1745	37.785	9.2041
6.3087	44.841	9.0521
6.443	36.373	4.3334
6.5772	38.137	4.8597
6.7114	41.274	9.2982
6.8456	40.392	13.4653
6.9799	42.254	11.6264
7.1141	37.661	8.4765
7.2483	37.766	15.605
7.3826	37.736	16.6157
7.5168	36.449	18.8112
7.651	51.42	36.2259
7.7852	54.79	47.8179
7.9195	62.072	61.0546
8.0537	80.837	89.5338
8.1879	78.254	93.6384
8.3221	86.264	102.772
8.4564	86.474	102.101
8.5906	72.446	85.4648
8.7248	61.806	70.5705
8.8591	55.859	54.7794
8.9933	47.839	28.1715
9.1275	45.656	19.1473
9.2617	34.46	15.732
9.396	29.622	12.9955
9.5302	32.368	12.89
9.6644	31.851	5.457
9.7987	33.688	7.0798
9.9329	27.562	15.0779
10.0671	30.402	14.3834
10.2013	30.503	8.8289
10.3356	25.375	12.4255
10.4698	23.787	11.1207
10.604	27.235	14.9922
10.7383	32.449	12.8338
10.8725	24.479	14.0874
11.0067	24.154	14.9742
11.1409	27.642	13.2506
11.2752	34.459	19.4517
11.4094	31.416	19.8604
11.5436	31.527	16.7015
11.6779	31.281	10.3191
11.8121	28.023	6.7306
11.9463	30.551	9.3114
12.0805	22.566	8.4588
12.2148	23.421	19.4416
12.349	27.311	13.0151
12.4832	28.856	15.5026
12.6174	33.191	20.2487
12.7517	43.439	30.8993
12.8859	51.9	33.7504
13.0201	48.725	38.6293
13.1544	53.853	60.058
13.2886	59.539	58.0539
13.4228	61.885	74.0933
13.557	79.592	62.3753
13.6913	83.153	63.3122
13.8255	79.44	69.1053
13.9597	75.175	67.6205
14.094	60.795	52.1785
14.2282	57.371	31.4038
14.3624	39.844	24.0778
14.4966	31.378	15.3251
14.6309	22.404	9.5354
14.7651	24.198	10.5018
14.8993	26.295	10.3968
15.0336	26.756	6.3272
15.1678	39.569	4.5988
15.302	27.208	4.9906
15.4362	30.691	6.6922
15.5705	33.168	7.9133
15.7047	27.982	5.8856
15.8389	36.498	5.403
15.9732	35.365	10.4467

## Sheet: panel 3F_percentage
Plant	iRH	GFP+mCherry	GFP only	mCherry only
1	RH 1	2	0	0
2	RH 2	2	3	0
2	RH 3	5	0	0
2	RH 4	3	0	0
3	RH 5	3	0	0
3	RH 6	4	0	0
3	RH 7	2	0	0
3	RH 8	4	0	0
4	RH 9	4	0	0
5	RH 10	4	0	0
5	RH 11	5	0	0
5	RH 12	4	0	0
6	RH 13	1	0	0
6	RH 14	3	0	0
6	RH 15	5	0	0
		51	3	0	number
		94.4444	5.55556	0	%
