# Supplementary material for: RPG acts as a central determinant for infectosome formation and cellular polarization during intracellular rhizobial infections
Source: eLife journal article supplement (doi:10.7554/elife.80741), 2023-02-22
Supplement: fig3-figsupp1-data1 [file elife-80741-fig3-figsupp1-data1-v2.zip]

## Sheet: Values
Intensity profile
Distance (micron)	Gray value mCherry	Gray value GFP + CFP
0	4	10
0.057	3.138	9.93
0.1139	3.013	10.754
0.1709	3.214	10.277
0.2278	3.011	9.562
0.2848	3.22	9.532
0.3417	3.174	10.411
0.3987	4	11.928
0.4556	4	10.249
0.5126	4.761	10.557
0.5695	4.976	9.73
0.6265	4.515	10.456
0.6834	3.973	12.027
0.7404	3.662	13.091
0.7973	4.911	14.666
0.8543	4.404	12.835
0.9113	4.102	11.919
0.9682	4.608	10.875
1.0252	5.055	10.478
1.0821	5.622	10.622
1.1391	6.38	11.252
1.196	4.435	8.732
1.253	4.971	8.144
1.3099	4.167	7.814
1.3669	4	8.106
1.4238	4.558	9.407
1.4808	4.904	10.612
1.5377	5.282	11.282
1.5947	6.153	11.643
1.6516	5.998	10.64
1.7086	6	11.689
1.7655	5.047	13.021
1.8225	5.715	13.055
1.8795	6.386	12.184
1.9364	6.466	10.967
1.9934	6.638	11.135
2.0503	5.033	10.02
2.1073	5.239	11.333
2.1642	5.242	12.113
2.2212	6.379	12.472
2.2781	7.381	11.393
2.3351	8.608	10.085
2.392	8.298	10.058
2.449	6.208	10.792
2.5059	6.529	10.719
2.5629	7.574	10.384
2.6198	8.568	8.099
2.6768	8.788	7.906
2.7338	9.221	8.306
2.7907	9.372	9.161
2.8477	9.527	9.912
2.9046	8.229	11.13
2.9616	7.491	11.177
3.0185	7.838	10.685
3.0755	9.059	11.019
3.1324	9.787	11.762
3.1894	11.004	11.068
3.2463	12.727	11.036
3.3033	14.11	12.019
3.3602	15.629	13.644
3.4172	16.409	12.879
3.4741	18.202	10.842
3.5311	21.441	9.498
3.588	24.835	8
3.645	28.593	8.816
3.702	30.68	9.938
3.7589	39.244	11.862
3.8159	51.95	12
3.8728	68.058	12.553
3.9298	82.742	12.881
3.9867	89.796	12.362
4.0437	99.104	12.776
4.1006	105.524	12.553
4.1576	119.991	13.031
4.2145	128.757	12.955
4.2715	136.271	15.318
4.3284	130.788	16
4.3854	121.178	17.986
4.4423	115.615	22.277
4.4993	110.855	26.755
4.5563	95.52	34.461
4.6132	69.961	45.586
4.6702	51.448	52.419
4.7271	38.038	60.676
4.7841	28.11	66.646
4.841	20.798	70.21
4.898	13.806	79.434
4.9549	9.924	90.843
5.0119	8.555	107.485
5.0688	7.305	114.543
5.1258	6.617	117.173
5.1827	5.572	117.894
5.2397	4.667	114.28
5.2966	3.805	109.622
5.3536	2.977	110.36
5.4105	3.009	106.944
5.4675	3	100.182
5.5245	3	93.058
5.5814	3	85.904
5.6384	3.131	80.827
5.6953	3.722	80.01
5.7523	3.776	85.084
5.8092	3.015	79.252
5.8662	3.718	80.222
5.9231	3.108	75.157
5.9801	3	68.419
6.037	3	62.5
6.094	3	55.744
6.1509	3	45.363
6.2079	3	39.447
6.2648	3	37.331
6.3218	3	33.585
6.3788	3	29.564
6.4357	3	25.105
6.4927	3	20.153
6.5496	3	17.668
6.6066	3	15.908
6.6635	3	13.275
6.7205	3	12.247
6.7774	3	12.677
6.8344	3	14.155
6.8913	3.092	13.389
6.9483	3.778	12.132
7.0052	4	12.266
7.0622	4	12.058
7.1191	3.446	13.446
7.1761	3.804	13.433
7.2331	3.646	12.176
7.29	3.51	10.808
7.347	3	10.722
7.4039	3	12
7.4609	3.336	11.702
7.5178	3.842	12.678
7.5748	3.313	11.068
7.6317	3	12.504
7.6887	3.624	13.788
7.7456	3.726	14.036
7.8026	3.323	14
7.8595	3.001	14
7.9165	3	13.031
7.9734	3	12.276
8.0304	3.586	11.601
8.0873	4.448	11.094
8.1443	4.588	11.595
8.2013	4.067	12.332
8.2582	3.555	13.985
8.3152	3.007	13.164
8.3721	3.865	13.532
8.4291	3.413	13.608
8.486	3	14.703
8.543	3.347	15.61
8.5999	4.209	14.634
8.6569	5	14.86
8.7138	4.524	13.101
8.7708	4.018	13
8.8277	3.83	13.319
8.8847	3.477	15.026
8.9416	3	16.309
8.9986	3	15.741
9.0556	3.052	14.323
9.1125	3	12.1
9.1695	3.394	12.615
9.2264	3.023	12.382
9.2834	3.239	12.779
9.3403	3.4	12.608
9.3973	3.448	12.407
9.4542	3	12.992
9.5112	3	12.444
9.5681	3	13.737
9.6251	3	14.422
9.682	3	14.357
9.739	3.455	13.678
9.7959	4	13.104
9.8529	4	11.441
9.9098	4.105	13.675
9.9668	4.059	12.709
10.0238	4.767	11.849
10.0807	4.767	11.533
10.1377	4.933	12
10.1946	4.459	12
10.2516	4.784	12
10.3085	4.078	12.054
10.3655	4.789	12.312
10.4224	4.066	13.335
10.4794	4.723	15.215
10.5363	4.831	14.096
10.5933	4.886	12.496
10.6502	5	12.252
10.7072	4.915	13.336
10.7641	5.271	15.372
10.8211	5.415	16.034
10.8781	5.067	15.299
10.935	4.775	13.648
10.992	4.269	12.695
11.0489	4	13.018
11.1059	4	13.677
11.1628	3.75	15.224
11.2198	3.243	14.006
11.2767	4.001	13.068
11.3337	4.308	11.631
11.3906	4.462	11.462
11.4476	4.746	12.254
11.5045	4.32	13.795
11.5615	5.205	15.912
11.6184	4.725	13.876
11.6754	5.74	12.27
11.7323	5.572	11.335
11.7893	5.269	12.728
11.8463	5.687	14.839
11.9032	6.87	16.276
11.9602	6.661	14
12.0171	6.154	14
12.0741	4.486	13.648
12.131	4.532	14.391
12.188	5	15.535
12.2449	5	16
12.3019	5.518	16.259
12.3588	7	17.215
12.4158	6.994	18.577
12.4727	7.087	18.103
12.5297	5.888	19.014
12.5866	5.661	19.039
12.6436	5.095	21.384
12.7006	4.977	23.922
12.7575	5.225	25.42
12.8145	6.935	32.837
12.8714	6.61	37.801
12.9284	6.719	41.849
12.9853	6.214	50.649
13.0423	6.469	67.505
13.0992	6.378	95.408
13.1562	5.242	128.641
13.2131	5.549	145.058
13.2701	5.026	171.762
13.327	4.892	184.775
13.384	5.643	204.655
13.4409	6.505	222.304
13.4979	6.988	227.505
13.5548	6.371	230.063
13.6118	6.092	232.575
13.6688	6.955	248.047
13.7257	7.824	250.824
13.7827	8.679	245.213
13.8396	7.794	238.04
13.8966	6.112	234.151
13.9535	6.516	229.205
14.0105	7.559	214.397
14.0674	7.916	201.152
14.1244	7.061	191.31
14.1813	6.284	182.92
14.2383	6.578	168.978
14.2952	7.057	153.048
14.3522	7.724	137.755
14.4091	9.037	126.943
14.4661	10.315	112.68
14.5231	12.652	98.763
14.58	12.367	87.542
14.637	12.389	83.513
14.6939	12.046	80.697
14.7509	11.913	73.582
14.8078	12.884	63.617
14.8648	12.888	50.231
14.9217	12.633	38.426
14.9787	14.186	33.684
15.0356	16.267	27.501
15.0926	18.123	22.082
15.1495	19.663	19.118
15.2065	18.236	18
15.2634	17.042	17.83
15.3204	17.923	16.276
15.3774	20.701	14.479
15.4343	22.974	14.229
15.4913	23.706	14.186
15.5482	24.994	13.794
15.6052	26.255	13.876
15.6621	28.953	15.041
15.7191	32.252	14.369
15.776	36.186	13.393
15.833	37.243	13.389
15.8899	38.929	12.221
15.9469	42.685	11.955
16.0038	42.305	13.619
16.0608	40.591	15.289
16.1177	39.815	14.905
16.1747	39.571	13.993
16.2316	42.328	13.322
16.2886	43.509	14.853
16.3456	42.293	15.48
16.4025	42.182	14.911
16.4595	46.646	13.592
16.5164	48.097	14.009
16.5734	46.541	14.549
16.6303	46.473	13.695
16.6873	47.763	13.963
16.7442	48.027	14.711
16.8012	48.686	14.742
16.8581	50.291	15.252
16.9151	47.566	15.988
16.972	49.496	16
17.029	48.77	16.035
17.0859	48.956	17.086
17.1429	49.471	16.212
17.1999	46.512	13.396
17.2568	46.484	14.046
17.3138	48.782	14.664
17.3707	51.656	14.321
17.4277	53.458	14.041
17.4846	53.455	12.566
17.5416	53.996	12.628
17.5985	52.292	13.926
17.6555	53.841	15.884
17.7124	51.089	13.573
17.7694	51.564	13.755
17.8263	52.061	14.589
17.8833	50.865	14.507
17.9402	51.175	13.871
17.9972	50.627	12.585
18.0541	49.568	13.42
18.1111	49.379	13.494
18.1681	50.202	12.034
18.225	53.137	12.743
18.282	54.012	12.961
18.3389	52.925	12.323
18.3959	52.26	12.297
18.4528	52.127	12.166
18.5098	52.238	12.238
18.5667	50.558	12.453
18.6237	49.883	13.61
18.6806	50.907	13.046
18.7376	53.216	12.745
18.7945	54.777	14.759
18.8515	52.975	15.196
18.9084	48.931	15.012
18.9654	48.853	12.722
19.0224	49.405	10.99
19.0793	52.839	10.025
19.1363	54.441	10.071
19.1932	54.162	11.042
19.2502	52.906	12.488
19.3071	51.337	13.064
19.3641	50.568	13.824
19.421	49.227	12.349
19.478	48.733	11.443
19.5349	50.417	10.63
19.5919	53.662	11.637
19.6488	56.344	12.997
19.7058	56.256	12.982
19.7627	53.129	13.546
19.8197	50.554	14
19.8766	49.624	13.827
19.9336	48.135	12.211
19.9906	47.836	12.042
20.0475	48.074	12.324
20.1045	49.196	12.439
20.1614	48.036	12.847
20.2184	45.361	11.673
20.2753	44.534	11.297
20.3323	45.484	10.27
20.3892	44.466	10.381
20.4462	42.319	10
20.5031	43.123	10.562
20.5601	45.201	10.974
20.617	49.485	10.121
20.674	49.532	11.584
20.7309	49.773	10.521
20.7879	48.78	11.393
20.8449	47.899	10.363
20.9018	45.408	9.045
20.9588	47.623	8.277
21.0157	46.762	9.952
21.0727	45.871	11.34
21.1296	46.871	12.877
21.1866	45.429	12.087
21.2435	45.469	11.623
21.3005	45.174	10.348
21.3574	46.109	10.999
21.4144	47.979	11.201
21.4713	46.79	12.398
21.5283	46.452	12.194
21.5852	48.193	10.81
21.6422	46.362	10.048
21.6992	49.637	11.055
21.7561	51.206	10.584
21.8131	51.372	10.313
21.87	50.704	10.212
21.927	49.205	11.529
21.9839	48.142	11.166
22.0409	49.447	10.591
22.0978	51.333	12.535
22.1548	49.765	12.612
22.2117	49.659	11.315
22.2687	50.446	10.186
22.3256	50.162	9.914
22.3826	49.111	10.865
22.4395	47.502	11.576
22.4965	48.854	11.36
22.5534	49.553	10.149
22.6104	47.591	10
22.6674	49.97	10
22.7243	50.74	11.219
22.7813	49.793	12
22.8382	50.413	12.23
22.8952	52.087	13.113
22.9521	52.152	12.687
23.0091	53.852	12.026
23.066	52.304	11.631
23.123	51.446	10
23.1799	51.18	10
23.2369	51.588	11.001
23.2938	52.867	12.043
23.3508	53.655	12.541
23.4077	53.735	10.375
23.4647	50.78	11.353
23.5217	50.688	12.708
23.5786	52.05	12.38
23.6356	54.843	13.866
23.6925	55.565	12.409
23.7495	54.046	12.24
23.8064	51.721	12.373
23.8634	50.019	12.524
23.9203	50.853	12.639
23.9773	51.441	12.212
24.0342	50.723	11.385
24.0912	48.849	10.924
24.1481	48.649	9.079
24.2051	50.491	9.283
24.262	51.255	10.01
24.319	53.542	10.477
24.3759	53.773	12.632
24.4329	51.665	13.559
24.4899	51.525	14.76
24.5468	52	14.247
24.6038	52.042	11.557
24.6607	53.328	10.109
24.7177	52.391	9.532
24.7746	52.227	9.565
24.8316	53.426	9.817
24.8885	53.999	11.863
24.9455	54.032	11.589
25.0024	53.121	11.263
25.0594	52.782	11.523
25.1163	51.477	11.121
25.1733	52.746	11.481
25.2302	52.474	12.323
25.2872	52.379	13.17
25.3442	52.732	12.788
25.4011	51.098	11.646
25.4581	50.246	11.969
25.515	52.086	12.362
25.572	51.22	10.822
25.6289	49.541	8.442
25.6859	51.499	9.586
25.7428	52.444	10.106
25.7998	51.284	10
25.8567	46.56	10
25.9137	46.689	10.812
25.9706	46.349	12.053
26.0276	47.154	12.441
26.0845	45.983	12.55
26.1415	44.689	11.474
26.1985	45.98	9.925
26.2554	44.977	10.179
26.3124	43.811	10.011
26.3693	42.679	9.528
26.4263	42.31	8.524
26.4832	41.615	9.6
26.5402	40.306	9.281
26.5971	38	9.226
26.6541	38.579	10.693
26.711	39.332	10.944
26.768	38.714	10.617
26.8249	37.062	11.255
26.8819	33.075	9.803
26.9388	29.254	9.686
26.9958	25.5	8.85
27.0527	22.281	8
27.1097	20.225	8
27.1667	16.926	9.429
27.2236	13.042	8.589
27.2806	12.14	7.624
27.3375	9.983	5.99
27.3945	9.146	6.037
27.4514	6.911	6.675
27.5084	5.672	6.672
27.5653	4.906	6
27.6223	4.131	6
27.6792	4.496	6.496
27.7362	3.671	5.841
27.7931	3.09	4.819
27.8501	3	4.042
27.907	3.163	4.559
27.964	3.209	5.209
28.021	3	5.05
28.0779	3	5.687
28.1349	3	5.675
28.1918	3.022	4.464
28.2488	3	4.737
28.3057	3	5.027
28.3627	3	5.774
28.4196	3	5.68
28.4766	3.15	6
28.5335	3.632	5.845
28.5905	3.019	5.005
28.6474	3	5.046
28.7044	3	5.344
28.7613	3.337	5.615
28.8183	3.927	6.926
28.8752	3.181	5.569
28.9322	3.59	4.807
28.9892	3.32	5.815
29.0461	2	5.544
29.1031	2	5.901
29.16	2	5.194
29.217	2	5.051
29.2739	2.074	4.425
29.3309	2.712	5.966
29.3878	3	5.914
29.4448	2.483	6
29.5017	2.441	4.751
29.5587	2.245	4
29.6156	2.148	4
29.6726	3.143	4.886
29.7295	4	5
29.7865	4	5.266
29.8435	4	6.422
29.9004	3.312	6
29.9574	3	6
30.0143	3.362	5.575
