# Supplementary material for: RPG acts as a central determinant for infectosome formation and cellular polarization during intracellular rhizobial infections
Source: eLife journal article supplement (doi:10.7554/elife.80741), 2023-02-22
Supplement: fig3-figsupp4-data1 [file elife-80741-fig3-figsupp4-data1-v2.zip]

## Sheet: Fig3-suppl4-panel B_values
Intesity profile
Distance (microns)	Gray value mCherry	Gray value CFP
0	5	19
0.0672	4.0033	17.759
0.1345	5.9867	12.868
0.2017	5.2519	12.756
0.2689	5.991	13.317
0.3362	6	15.957
0.4034	6	20.377
0.4706	6	20.154
0.5378	6	21.32
0.6051	6	16.934
0.6723	6	15.589
0.7395	6	15.975
0.8068	6.9386	17.877
0.874	6.0407	18.957
0.9412	7.6389	18.732
1.0085	6.8168	24.046
1.0757	7.356	22.568
1.1429	7.013	19.174
1.2102	6.5615	14.738
1.2774	5.605	19.322
1.3446	5.0418	21.514
1.4119	5.3922	21.711
1.4791	5.7771	19.012
1.5463	5.8738	18.641
1.6135	6.9167	17.945
1.6808	7.003	16.133
1.748	7	15.184
1.8152	6.2715	17.385
1.8825	6.0262	16.134
1.9497	5.6724	17.152
2.0169	6.0565	16.41
2.0842	5.9947	20.164
2.1514	6	20.821
2.2186	5.1097	24.568
2.2859	5.6829	22.747
2.3531	5.8514	22.297
2.4203	5.992	18.554
2.4876	5.123	18.877
2.5548	5.8737	21.621
2.622	5.2839	23.278
2.6892	5.483	23.224
2.7565	4.5228	19.249
2.8237	4.9193	16.36
2.8909	5.8571	17.294
2.9582	6	20.88
3.0254	6	25.588
3.0926	6	23.896
3.1599	6.9881	23.992
3.2271	7.0896	25.62
3.2943	7.0081	25.992
3.3616	6.2152	25.044
3.4288	6.1548	22.74
3.496	6.2363	24.563
3.5633	6.056	26.347
3.6305	6	25.65
3.6977	6.8172	29.535
3.7649	7	28.958
3.8322	7.5217	28.644
3.8994	6.9179	27.696
3.9666	5.5098	25.668
4.0339	5.2016	26.271
4.1011	4.2394	30.066
4.1683	4.8449	39.58
4.2356	5.1324	42.603
4.3028	5.8328	48.465
4.37	6	48.664
4.4373	6	57.156
4.5045	6.421	64.4
4.5717	7.5904	71.413
4.6389	8.2363	75.15
4.7062	8.2973	77.498
4.7734	7.4518	76.061
4.8406	7.1343	84.169
4.9079	7.0128	86.667
4.9751	6.9714	85.909
5.0423	7.6406	69.466
5.1096	7.9516	55.042
5.1768	8	47.604
5.244	8	41.233
5.3113	6.9411	37.343
5.3785	7.2167	31.241
5.4457	6.6704	29.156
5.513	6.8146	25.967
5.5802	7	24.21
5.6474	6.887	24.721
5.7146	6.2613	24.175
5.7819	5.2841	24.716
5.8491	6.3593	24.289
5.9163	6.1234	25.295
5.9836	5.7494	27.334
6.0508	4.9671	26.596
6.118	4.1774	26.529
6.1853	4.3506	25.599
6.2525	4.8218	25.446
6.3197	5.2352	25.423
6.387	5.9448	25.122
6.4542	6.0572	25.283
6.5214	5.3224	24.387
6.5887	4.3258	22.01
6.6559	4.7362	21.889
6.7231	5.7164	22.587
6.7903	6	23.483
6.8576	4.6781	23.486
6.9248	4.6576	23.732
6.992	5.3451	22.691
7.0593	6.0969	21.349
7.1265	6.1284	21.884
7.1937	5.8177	22.283
7.261	5.7985	23.484
7.3282	5.88	22.692
7.3954	5.9614	23.181
7.4627	6	25.278
7.5299	6.5497	25.606
7.5971	6.1698	27.105
7.6644	5.8911	25.694
7.7316	6	26.612
7.7988	6.6144	28.277
7.866	6.7138	29.182
7.9333	6.2405	28.016
8.0005	5.211	26.06
8.0677	4.9107	25.22
8.135	5.5978	23.718
8.2022	6.5945	20.8
8.2694	6.9916	19.053
8.3367	7	21.009
8.4039	6.4155	24.013
8.4711	5.846	25.265
8.5384	5.4761	27.303
8.6056	5.7566	28.236
8.6728	6	28.616
8.7401	6	25.647
8.8073	5.4354	22.656
8.8745	5.5612	24.315
8.9417	5.5341	27.726
9.009	5.0834	30.359
9.0762	5.0019	27.696
9.1434	5	23.551
9.2107	5.5446	23.781
9.2779	6	25.279
9.3451	6	27.345
9.4124	5.7832	26.761
9.4796	5.7718	25.285
9.5468	5.7721	23.992
9.6141	5.3089	24.366
9.6813	5.9026	25.21
9.7485	5.9707	25.007
9.8157	5.566	23.047
9.883	5.9876	25.153
9.9502	6.508	29.701
10.0174	7.4347	31.542
10.0847	7.2785	32.009
10.1519	6.5482	32.892
10.2191	5.9287	33.24
10.2864	6.0269	30.307
10.3536	6.454	26.314
10.4208	6.6767	26.633
10.4881	7	28.711
10.5553	6.8998	28.371
10.6225	7.8215	26.728
10.6898	8.4818	24.683
10.757	7.5318	24.409
10.8242	6.5892	23.705
10.8914	6.1977	24.249
10.9587	6.2792	25.33
11.0259	6.1966	25.803
11.0931	6.1996	28.11
11.1604	6.5236	29.981
11.2276	6.6051	28.646
11.2948	6.8249	26.295
11.3621	7	25.105
11.4293	7	25.329
11.4965	6.1666	23.726
11.5638	5.4283	23.285
11.631	6	26.275
11.6982	6.4216	27.083
11.7655	6.8926	25.636
11.8327	6.5214	26.837
11.8999	5.6828	30.845
11.9671	5.2037	32.264
12.0344	5.6533	27.527
12.1016	6.1349	22.401
12.1688	6.2544	20.857
12.2361	6.1729	22.346
12.3033	6.4473	21.72
12.3705	6.6116	21.761
12.4378	6.0715	25.371
12.505	6.0946	29.552
12.5722	6	30.218
12.6395	6	27.539
12.7067	6	24.179
12.7739	6	22.843
12.8412	6.2046	21.418
12.9084	6.6417	25.676
12.9756	6.7232	30.509
13.0428	6.5189	34.792
13.1101	5.6482	33.683
13.1773	5.3372	30.933
13.2445	5.6548	28.672
13.3118	5.0446	28.086
13.379	5.1402	27.251
13.4462	5.3352	24.366
13.5135	5.6681	22.413
13.5807	5	23.643
13.6479	4.8497	23.026
13.7152	4.7419	21.796
13.7824	5.3186	20.491
13.8496	6	23.126
13.9168	6	25.57
13.9841	5.9831	26.724
14.0513	5.7029	26.131
14.1185	5.0755	31.916
14.1858	5	34.636
14.253	5.2153	33.161
14.3202	5.7504	29.044
14.3875	6.452	26.074
14.4547	7.3463	27.778
14.5219	7	27.887
14.5892	6.9104	29.017
14.6564	6.5506	27.954
14.7236	6	26.478
14.7909	6.2687	25.598
14.8581	7.2654	26.521
14.9253	7.9775	29.27
14.9925	7.876	33.379
15.0598	7.7446	34.465
15.127	7.0832	35.999
15.1942	7.0605	33.658
15.2615	6.2455	34.624
15.3287	6.897	31.172
15.3959	6.8127	31.783
15.4632	7.2395	28.826
15.5304	6.68	28.329
15.5976	6.9004	29.519
15.6649	6.7646	32.387
15.7321	6.2856	34.832
15.7993	7.1131	37.576
15.8666	7.3823	38.553
15.9338	8.9044	40.531
16.001	9.901	36.577
16.0682	10.6977	34.792
16.1355	9.3361	31.721
16.2027	8.5338	30.481
16.2699	7.6539	30.15
16.3372	8	29.538
16.4044	8	31.265
16.4716	8	29.235
16.5389	8.1823	30.628
16.6061	9	28.345
16.6733	9.3513	28.977
16.7406	10.8277	26.148
16.8078	10.062	27.36
16.875	10.4483	29.306
16.9423	10.2814	32.702
17.0095	9.0618	30.726
17.0767	9.1516	27.338
17.1439	8.2258	27.78
17.2112	7.9738	30.759
17.2784	7.0092	31.509
17.3456	7.1743	29.093
17.4129	7.847	30.126
17.4801	6.7074	34.407
17.5473	5.9024	37.035
17.6146	5.4736	37.046
17.6818	6.4981	35.224
17.749	7	35.075
17.8163	7	35.378
17.8835	7	33.659
17.9507	7	32.991
18.018	6.8908	29.273
18.0852	6	31.339
18.1524	6.0004	27.996
18.2196	6.0992	27.78
18.2869	7.0153	25.27
18.3541	7.2406	26.833
18.4213	7.3221	29.855
18.4886	7.5241	27.789
18.5558	8.93	27.375
18.623	8.6457	25.894
18.6903	9.3977	29.993
18.7575	6.3235	31.155
18.8247	6.9307	34.446
18.892	6.066	34.601
18.9592	7	31.815
19.0264	7	28.617
19.0936	7	25.387
19.1609	7	25.076
19.2281	7.0346	26.772
19.2953	7.6364	29.909
19.3626	8	31.161
19.4298	8.0214	35.222
19.497	8.6391	34.61
19.5643	9	37.647
19.6315	8.9474	32.317
19.6987	7.13	35.746
19.766	7.0486	30.98
19.8332	7	27.877
19.9004	7.0018	24.952
19.9677	7.1831	29.028
20.0349	6.2799	31.285
20.1021	6.7092	32.421
20.1693	5.443	30.326
20.2366	6.5212	32.564
20.3038	5.607	28.019
20.371	5.0049	26.014
20.4383	4.0105	25.242
20.5055	5.9724	30.619
20.5727	6	32.12
20.64	7.9593	28.082
20.7072	7.1136	22.143
20.7744	7.0047	24.75
20.8417	6.2776	28.87
20.9089	6.3364	32.549
20.9761	6.4178	33.238
21.0434	5.0606	33.017
21.1106	5.5554	33.724
21.1778	6.6152	34.618
21.245	7.6933	31.906
21.3123	7.9906	33.552
21.3795	8	29.275
21.4467	8	28.094
21.514	6.9245	28.972
21.5812	6.6979	28.859
21.6484	6.7511	28.119
21.7157	6.9769	28.617
21.7829	7	25.105
21.8501	6.5189	26.847
21.9174	6.5584	23.622
21.9846	6.6398	24.578
22.0518	6.7213	26.377
22.119	6.9815	26.394
22.1863	7	28.732
22.2535	9.6993	29
22.3207	9.0515	30.845
22.388	9.7645	31.358
22.4552	8.1973	29.29
22.5224	7.1135	26.341
22.5897	7.8831	22.467
22.6569	7.1202	21.52
22.7241	7	24.635
22.7914	6.1268	30.269
22.8586	6.608	32.048
22.9258	6.9707	30.145
22.9931	6.1368	28.928
23.0603	6.0487	30.53
23.1275	6.0284	31.711
23.1947	6.8688	31.544
23.262	5.3002	30.718
23.3292	5.8466	31.992
23.3964	6	32.942
23.4637	6.8399	32.094
23.5309	6.5931	31.168
23.5981	6.5951	29.333
23.6654	6.115	28.17
23.7326	6.8266	24.92
23.7998	7	24.783
23.8671	7	26
23.9343	7.8191	27.625
24.0015	8.0157	30.173
24.0688	8.6761	31.582
24.136	7.7474	27.51
24.2032	6.8038	24.498
24.2704	5.7902	23.986
24.3377	4.7121	28.841
24.4049	4.0883	29.836
24.4721	4.7901	25.495
24.5394	5.208	21.903
24.6066	6.1096	21.241
24.6738	5.4228	24.143
24.7411	5.8167	27.377
24.8083	6.7259	30.197
24.8755	6.197	29.284
24.9428	6.1721	26.303
25.01	6.0723	23.628
25.0772	6.2944	21.023
25.1445	6.114	23.058
25.2117	6.4146	27.014
25.2789	6.1578	31.672
25.3461	6	33.887
25.4134	6.1527	29.923
25.4806	6.1238	26.408
25.5478	6.748	22.988
25.6151	6.9792	24.414
25.6823	7	24.817
25.7495	7	23.061
25.8168	7	22.157
25.884	7	23.703
25.9512	6.2831	25.56
26.0185	6	27.764
26.0857	5.7225	28.08
26.1529	5.9094	28.741
26.2201	6	26.8
26.2874	5.2997	26.08
26.3546	5.6519	25.478
26.4218	5.3063	27.77
26.4891	5	28.31
26.5563	5	28.687
26.6235	5.5052	26.444
26.6908	5.6574	27.384
26.758	5.8631	27.644
26.8252	6	29.538
26.8925	6	30.761
26.9597	6	30.559
27.0269	6	27.513
27.0942	6.5491	27.322
27.1614	6.9128	26.83
27.2286	6.3442	27.3
27.2958	5.3231	21.92
27.3631	5	19.748
27.4303	5.7975	22.295
27.4975	6.7556	26.624
27.5648	7	29.545
27.632	6.0599	28.745
27.6992	5.7914	28
27.7665	5.5948	26.784
27.8337	5.7264	25.364
27.9009	6	23.76
27.9682	6.0676	24.171
28.0354	6.6247	25.011
28.1026	6.3568	27.407
28.1699	6.4724	29.892
28.2371	6.441	30.175
28.3043	6.2978	28.782
28.3715	5.782	27.267
28.4388	5.781	27.39
28.506	6	26.922
28.5732	6.5873	26.663
28.6405	6.5882	27.229
28.7077	6.2134	28.189
28.7749	6.1319	27.268
28.8422	6.5955	27.148
28.9094	6.9557	26.947
28.9766	6.8875	27.232
29.0439	6.4608	27.562
29.1111	6.6817	27.614
29.1783	7	28.646
29.2456	7.3112	31.199
29.3128	7.4802	31.924
29.38	7.3987	30.858
29.4472	6.7732	31.62
29.5145	6.1083	30.462
29.5817	5.5455	29.909
29.6489	6.0633	27.829
29.7162	6.4692	28.167
29.7834	5.9525	28.235
29.8506	5.8285	25.835
29.9179	5.3579	24.707
29.9851	5.6906	25.91
30.0523	6.2021	26.931
30.1196	6.7676	24.229
30.1868	6.9136	21.557
30.254	6.8439	22.509
30.3213	6.628	26.503
30.3885	5.5904	28.353
30.4557	5.0953	28.145
30.5229	5.4979	28.471
30.5902	6.4876	30.785
30.6574	7	32.254
30.7246	7.1109	32.291
30.7919	6.8345	32.657
30.8591	6.6812	32.126
30.9263	6.7763	30.086
30.9936	6.6509	30.676
31.0608	6.556	30.657
31.128	6.2806	28.347
31.1953	6.108	25.777
31.2625	6	26.153
31.3297	6.0163	28.778
31.3969	6	28.213
31.4642	5.9437	29.554
31.5314	5.9754	27.767
31.5986	5.852	26.56
31.6659	5.3712	25.771
31.7331	5.2575	29.876
31.8003	5	33.524
31.8676	5.1632	32.672
31.9348	5.5965	30.056
32.002	6	29.171
32.0693	5.942	29.278
32.1365	5.9414	28.177
32.2037	6.0229	30.214
32.271	5.6999	32.856
32.3382	5.5124	33.699
32.4054	6	32.042
32.4726	5.8624	31.091
32.5399	5.9609	31.245
32.6071	6.4883	28.921
32.6743	6.4068	27.701
32.7416	6.2013	27.165
32.8088	5.6221	28.489
32.876	5	29.114
32.9433	5.0301	29.637
33.0105	5.3684	31.633
33.0777	6.082	31
33.145	5.8022	30.218
33.2122	5.1572	29.296
33.2794	5	30.614
33.3467	5.3513	29.963
33.4139	5.8223	25.821
33.4811	5.5708	23.14
33.5483	5.7709	23.838
33.6156	6	26.137
33.6828	6	25.823
33.75	5.6686	24.138
33.8173	4.9928	25.291
33.8845	5.0596	29.744
33.9517	5.1411	32.679
34.019	5.5406	30.092
34.0862	6.304	25.59
34.1534	6.6969	25.046
34.2207	7.1588	27.212
34.2879	6.3813	29.458
34.3551	5.587	27.62
34.4224	4.7974	26.107
34.4896	4.7663	25.884
34.5568	4.4172	28.764
34.624	5.3197	31.744
34.6913	6.322	34.322
34.7585	7.1187	34.207
34.8257	6.922	30.965
34.893	6.0067	27.971
34.9602	5.3631	26.346
35.0274	5.3253	27.141
35.0947	5	26.77
35.1619	5.1027	26.336
35.2291	5.5693	26.835
35.2964	6.1711	28.558
35.3636	6	30.897
35.4308	5.7517	29.508
35.4981	5	25.503
35.5653	5.2183	23.441
35.6325	5.8646	23.036
35.6997	6	25.665
35.767	6	30.524
35.8342	5.9036	32.892
35.9014	5.4964	30.877
35.9687	5.323	26.727
36.0359	5	25.479
36.1031	5	26.967
36.1704	4.8244	30.272
36.2376	4.2789	28.684
36.3048	5.0016	27.982
36.3721	5.0739	27.808
36.4393	5.1553	27.576
36.5065	5.2368	28.713
36.5737	5.449	27.485
36.641	6	27.661
36.7082	5.8149	26.348
36.7754	5	26.433
36.8427	5	28.175
36.9099	5	30.906
36.9771	5.1387	30.035
37.0444	6.057	29.675
37.1116	6.97	26.295
37.1788	6.8382	27.847
37.2461	5.9789	27.045
37.3133	5.9408	28.973
37.3805	6.7041	25.483
37.4478	6.7712	24.848
37.515	7.4626	25.346
37.5822	6.9348	30.149
37.6494	6.5356	31.536
37.7167	6.0951	30.755
37.7839	6.7847	28.739
37.8511	6.8834	27.042
37.9184	6.8747	25.36
37.9856	6.1184	25.038
38.0528	6.7839	25.779
38.1201	5.9779	25.523
38.1873	5.7265	24.788
38.2545	5.645	25.642
38.3218	5.5042	28.086
38.389	5	28.206
38.4562	4.9409	25.845
38.5235	4.4145	23.984
38.5907	5.3078	24.725
38.6579	6.0748	27.197
38.7251	6.8399	31.303
38.7924	5.953	31.593
38.8596	5.9679	28.006
38.9268	6	26.469
38.9941	6.6582	25.138
39.0613	6.947	25.053
39.1285	6.8596	25.233
39.1958	6.8758	25.936
39.263	6	24.721
39.3302	6	25.086
39.3975	6.8032	27.033
39.4647	7	28.927
39.5319	6.4818	28.931
39.5992	5.6243	27.24
39.6664	5.1725	29.602
39.7336	6.1813	34.676
39.8008	7.8963	32.044
39.8681	8.0551	30.488
39.9353	7.4709	26.759
40.0025	6.3296	25.432
40.0698	6	25.071
40.137	6.4965	26.37
40.2042	7.0134	32.08
40.2715	6.2776	30.395
40.3387	5.2303	32.027
40.4059	6.0649	28.538
40.4732	7.9149	27.097
40.5404	9.4283	26.531
40.6076	9.9564	26.517
40.6748	10.0956	29.981
40.7421	10.953	38.459
40.8093	10.9079	42.331
40.8765	10.3325	41.001
40.9438	10.5153	40.242
41.011	11.7546	44.575
41.0782	12.1056	55.797
41.1455	10.9723	64.535
41.2127	11.7134	69.707
41.2799	10.7916	69.209
41.3472	10.7326	76.711
41.4144	10.1776	89.093
41.4816	10.0192	106.928
41.5489	10.2561	124.695
41.6161	10.5598	136.65
41.6833	9.6999	153
41.7505	8.6215	155.867
41.8178	8.81	172.651
41.885	9.3373	199.405
41.9522	9.1425	225.238
42.0195	8.5092	243.869
42.0867	7	254.296
42.1539	7	254.908
42.2212	9.2172	255
42.2884	11.0051	255
42.3556	11.2132	255
42.4229	10.7107	255
42.4901	9.8127	255
42.5573	9.2736	255
42.6246	9.014	255
42.6918	10.7291	255
42.759	11.4022	255
42.8262	12.1495	255
42.8935	12.7355	255
42.9607	13.2628	255
43.0279	13.0706	255
43.0952	12.0416	255
43.1624	11.8354	249.076
43.2296	10.3334	243.41
43.2969	12.1209	223.009
43.3641	14.7758	208.107
43.4313	15.3089	195.73
43.4986	14.103	165.677
43.5658	14.4058	147.115
43.633	17.1273	127.971
43.7002	15.9483	115.364
43.7675	14.8793	97.316
43.8347	14.0841	80.861
43.9019	12.8469	71.685
43.9692	12.4076	66.544
44.0364	12.606	61.796
44.1036	13.5133	51.577
44.1709	13.4076	43.53
44.2381	14.7535	41.779
44.3053	15.6799	40.343
44.3726	15.0571	36.347
44.4398	14.0078	35.009
44.507	12.0761	37.076
44.5743	12.9077	37.353
44.6415	13.2538	35.945
44.7087	13.2578	32.155
44.7759	12.8141	29.57
44.8432	13.1642	29.966
44.9104	14.2318	33.388
44.9776	14.5996	31.027
45.0449	14.1841	31
45.1121	11.8208	28.102
45.1793	11.0715	23.953
45.2466	11.8101	21.576
45.3138	13	18.771
45.381	12.0559	20.592
45.4483	11.0269	21.964
45.5155	9.9997	22.751
45.5827	10.7081	24.759
45.65	11.7885	24.337
45.7172	11.9736	22.408
45.7844	11.735	22.47
45.8516	11.3585	20.599
45.9189	13.3638	17.288
45.9861	12.8808	16.155
46.0533	12.383	17.663
46.1206	11.2572	19.322
46.1878	10.0892	19.617
46.255	9.4835	19.391
46.3223	10.1337	19.646
46.3895	11.4883	20.031
46.4567	12.0754	21.055
46.524	12.6882	22.043
46.5912	13.5685	19.159
46.6584	14.9878	16.239
46.7257	16.9527	18.382
46.7929	18.0845	21.35
46.8601	19.7296	24.975
46.9273	23.2067	25.419
46.9946	26.5784	24.034
47.0618	29.8264	25.137
47.129	32.166	30.434
47.1963	36.0919	32.751
47.2635	40.9485	32.158
47.3307	43.2566	32.158
47.398	44.0596	28.53
47.4652	44.8909	27.982
47.5324	50.212	26.422
47.5997	55.5793	27.3
47.6669	60.1493	27.685
47.7341	64.4841	25.963
47.8013	66.3542	22.529
47.8686	70.8739	25.305
47.9358	69.2203	26.616
48.003	65.1155	28.688
48.0703	65.9698	26.271
48.1375	67.2008	24.698
48.2047	68.7929	24.696
48.272	71.5497	24.221
48.3392	72.4089	22.486
48.4064	70.4322	21.403
48.4737	71.1291	21.115
48.5409	68.0694	20
48.6081	69.9461	20.187
48.6754	73.1142	22.022
48.7426	77.237	24.552
48.8098	78.8429	25.918
48.877	79.4776	27.449
48.9443	81.1052	28.312
49.0115	84.5494	26.937
49.0787	84.5736	23.189
49.146	86.4947	19.508
49.2132	86.9715	22.599
49.2804	87.5475	23.327
49.3477	87.8868	21.63
49.4149	85.036	19.955
49.4821	82.0702	21.743
49.5494	85.071	26.312
49.6166	87.8513	28.822
49.6838	89.0734	26.785
49.7511	93.8087	25.951
49.8183	96.6191	25.136
49.8855	94.7307	27.768
49.9527	92.5278	30.777
50.02	89.3834	29.326
50.0872	86.8746	27.096
50.1544	85.0564	22.314
50.2217	88.6724	24.662
50.2889	94.7911	24.854
50.3561	94.9359	24.051
50.4234	93.6726	24.142
50.4906	95.27	24.144
50.5578	95.5353	24.693
50.6251	90.5931	26.423
50.6923	90.9853	26.932
50.7595	91.4124	23.62
50.8268	90.8257	22.054
50.894	92.0219	28.252
50.9612	93.1975	31.465
51.0284	93.5084	28.26
51.0957	93.033	27.17
51.1629	89.7007	25.564
51.2301	94.4706	26.438
51.2974	96.7304	24.227
51.3646	95.9099	23.208
51.4318	93.6438	24.327
51.4991	88.8551	25.185
51.5663	87.8516	25.096
51.6335	86.7037	24.977
51.7008	88.6165	27.261
51.768	90.8808	26.243
51.8352	90.1455	21
51.9025	90.2601	20.893
51.9697	91.8843	19.68
52.0369	94.5578	21.037
52.1041	93.6806	21.068
52.1714	88.6711	21.303
52.2386	88.8335	22.66
52.3058	89.1534	24.607
52.3731	89.7461	26.433
52.4403	89.8754	27.718
52.5075	90.6837	26.9
52.5748	88.2651	28.881
52.642	85.8339	26.257
52.7092	81.4313	25.274
52.7765	76.4948	23.993
52.8437	75.0834	21.326
52.9109	74.3119	22.558
52.9781	72.2857	30.155
53.0454	73.514	33.244
53.1126	74.2795	29.513
53.1798	74.0342	26.864
53.2471	73.6819	23.371
53.3143	73.591	22.202
53.3815	73.8404	24.521
53.4488	72.3785	27.837
53.516	67.13	26.521
53.5832	62.0353	24.943
53.6505	60.3968	22.426
53.7177	65.8407	24.004
53.7849	69.2975	24.638
53.8522	68.5419	26.854
53.9194	67.0269	30.232
53.9866	69.1326	25.927
54.0538	71.8892	22.51
54.1211	72.7395	23.819
54.1883	67.7998	28.462
54.2555	68.8777	28.932
54.3228	68.237	25.948
54.39	68.6494	22.747
54.4572	68.3689	19.878
54.5245	68.2063	20.529
54.5917	64.1368	26.328
54.6589	64.6303	25.14
54.7262	64.8877	23.366
54.7934	66.3898	21.387
54.8606	68.9457	23.124
54.9279	70.9714	21.439
54.9951	73.4929	22.005
55.0623	74.8651	22.343
55.1295	73.0481	21.443
55.1968	75.0796	21.167
55.264	80.5413	21.54
55.3312	87.8463	24.675
55.3985	91.2006	26.039
55.4657	86.9212	26.03
55.5329	83.2336	23.376
55.6002	79.3763	24.003
55.6674	76.3775	24.617
55.7346	76.0236	26.718
55.8019	75.5425	25.669
55.8691	75.8615	23.893
55.9363	76.7337	21.665
56.0036	76.149	24.706
56.0708	76.1674	25.285
56.138	75.2974	26.919
56.2052	72.3528	26.687
56.2725	70.349	25.952
56.3397	65.3534	25.149
56.4069	61.5551	25.654
56.4742	59.6577	27.372
56.5414	56.8293	27
56.6086	50.2674	25.937
56.6759	44.0754	25.134
56.7431	39.7047	26.252
56.8103	37.2812	26.583
56.8776	35.6518	23.55
56.9448	35.6231	24.778
57.012	33.0222	23.542
57.0793	27.2393	24.246
57.1465	21.6386	24.136
57.2137	18.9228	24.906
57.2809	18.0052	25.835
57.3482	18.5844	22.699
57.4154	18.0529	18.707
57.4826	16.2303	16.466
57.5499	13.3374	16.743
57.6171	11.7157	18.89
57.6843	9.4898	17.102
57.7516	8.2211	18.337
57.8188	8.0904	17.451
57.886	8.4535	16.657
57.9533	10.0021	18
58.0205	10.5671	18
58.0877	10.734	18.057
58.1549	9.133	17.248
58.2222	7.7327	15.198
58.2894	7.8628	16.273
58.3566	7.6178	19.552
58.4239	7.9513	21.743
58.4911	8	21.454
58.5583	7.6185	18.378
58.6256	7.0225	15.474
58.6928	8.1472	18.515
58.76	8.8304	20.515
58.8273	8.103	20.737
58.8945	7.1761	20.898
58.9617	7	21.36
59.029	6.983	18.556
59.0962	6.8501	13.517
59.1634	5.6789	12.463
59.2306	5.1293	12.342
59.2979	5.9493	13.289
59.3651	6	14.968
59.4323	6	15.047
59.4996	6.1615	16.744
59.5668	6	18
59.634	6	17.021
59.7013	5.4863	13.007
59.7685	5.9339	12.198
59.8357	6.8839	12.427

## Sheet: Fig3-suppl4-panel D_values
Intesity profile
Distance (microns)	Gray value mCherry	Gray value CFP
0	10	10
0.114	9.01	5.758
0.2279	9	9.909
0.3419	9.41	9.18
0.4559	9.9826	10.793
0.5698	10.9501	5.452
0.6838	10.8545	6.208
0.7978	10.9861	6.028
0.9118	9.1494	10.189
1.0257	8.7562	12.892
1.1397	8.5913	14.699
1.2537	8.4505	14.923
1.3676	7.7645	15.164
1.4816	8.7016	16.416
1.5956	8.1117	17.736
1.7095	8.0169	17.582
1.8235	7.1595	13.623
1.9375	7	10.41
2.0514	7	11.641
2.1654	7	15.242
2.2794	7.8006	16.293
2.3933	8.7906	17.533
2.5073	8.9227	17.802
2.6213	8.1743	19.801
2.7353	7.2393	17.719
2.8492	7.3591	17.762
2.9632	7.3375	17.018
3.0772	7.1966	20.491
3.1911	7.0558	23.281
3.3051	7.0851	25.251
3.4191	7.0676	23.378
3.533	7	21.352
3.647	7.3457	19.654
3.761	8.3195	19.297
3.8749	8.7894	19.579
3.9889	8.9757	25.72
4.1029	8.2878	27.504
4.2168	7.2907	28.027
4.3308	7	23.849
4.4448	7.3018	19.162
4.5588	7.8543	16.035
4.6727	8	14.449
4.7867	8.5326	16.395
4.9007	9.0245	18.18
5.0146	8.5499	17.892
5.1286	8.1521	17.118
5.2426	8.2816	17.143
5.3565	8.3793	18.652
5.4705	8.6355	18.274
5.5845	9.5114	15.563
5.6984	10	13.957
5.8124	10	14.434
5.9264	9.1935	15.35
6.0403	8.4659	15.14
6.1543	8.3267	14.226
6.2683	8.3376	13.685
6.3823	8.8885	16.774
6.4962	8.5977	20.805
6.6102	8.5201	21.66
6.7242	9	21.067
6.8381	9.2202	20.904
6.9521	9.4072	22.042
7.0661	9.1646	23.298
7.18	9	22.125
7.294	9.3618	20.564
7.408	10	17.609
7.5219	9.7597	17.555
7.6359	9.7699	20.885
7.7499	10.2569	22.317
7.8638	9.7197	19.854
7.9778	9.6007	17.674
8.0918	9.2927	18.582
8.2058	9.5756	19.431
8.3197	8.7939	18.867
8.4337	9.1112	17.7
8.5477	9.4225	16.219
8.6616	8.9288	17.073
8.7756	9.0789	18.307
8.8896	9.9875	17.569
9.0035	10.2862	15.428
9.1175	10.3261	14.943
9.2315	8.5899	17.432
9.3454	8.449	20.328
9.4594	8.4274	21.233
9.5734	9.4601	20.615
9.6873	11.8252	19.435
9.8013	10.8575	16.318
9.9153	9.735	18.443
10.0293	8.0485	18
10.1432	8.6496	17.654
10.2572	9.7805	14.783
10.3712	10.743	16
10.4851	10	16
10.5991	10	15.869
10.7131	9.9524	14.483
10.827	9.3295	14.699
10.941	8.5008	14.003
11.055	8.0328	12.044
11.1689	9.0501	13.733
11.2829	11.0664	19.026
11.3969	11.7403	20.995
11.5108	11.3177	19.466
11.6248	11.2571	10.89
11.7388	11.4771	11.973
11.8528	11.013	13.926
11.9667	9.6485	16.305
12.0807	9.9279	17.765
12.1947	10.1453	16.134
12.3086	10.9559	16
12.4226	11.9131	16
12.5366	11.1054	16
12.6505	10.4028	11.777
12.7645	9.1428	8.021
12.8785	8.9283	7.979
12.9924	9.0667	9.945
13.1064	9.1996	12.164
13.2204	9.0533	13.793
13.3343	9.4323	14.062
13.4483	9.0667	14.536
13.5623	9.6207	12.847
13.6763	10.6301	12.192
13.7902	11.7764	12.071
13.9042	10.3928	17.072
14.0182	10	16.064
14.1321	10	15.156
14.2461	10	13.709
14.3601	10.1866	14.245
14.474	10.0293	14.059
14.588	10	13.938
14.702	9.4088	13.657
14.8159	8.6088	14.782
14.9299	9.5264	12.318
15.0439	10.4064	11.069
15.1578	10.4183	9.766
15.2718	10.0417	13.323
15.3858	9.3403	16.022
15.4998	9	18.688
15.6137	8.8107	18.732
15.7277	8.5605	20.448
15.8417	8.776	17.254
15.9556	8.8316	13.08
16.0696	8.8621	11.856
16.1836	8.4147	14.336
16.2975	8.5741	15.835
16.4115	8.0323	14.302
16.5255	7.1897	14.257
16.6394	7.236	15.956
16.7534	7.6706	19.035
16.8674	8	19.4
16.9813	8.503	18.011
17.0953	8.4313	16.114
17.2093	8.4943	12.296
17.3233	8.8006	9.601
17.4372	8.7096	9.844
17.5512	8.5356	12.471
17.6652	7.9247	15.24
17.7791	7.9751	16.939
17.8931	7.5655	17.637
18.0071	8.1646	16.637
18.121	9.1878	13.876
18.235	8.8661	12.809
18.349	8.6579	15.578
18.4629	7.675	18.769
18.5769	7.6642	20.749
18.6909	7.4667	20.078
18.8048	8.1567	16.977
18.9188	8	15.575
19.0328	8	15.016
19.1468	8	14.669
19.2607	8.2539	13.636
19.3747	8.6584	12.545
19.4887	8.2069	14
19.6026	8.7711	14.57
19.7166	8.7319	16
19.8306	8.735	16
19.9445	8	14.98
20.0585	8.2451	12.204
20.1725	8.5455	12.706
20.2864	7	14.982
20.4004	7.0462	18
20.5144	7.488	18.203
20.6284	8.1952	14.194
20.7423	8.9329	14.905
20.8563	8.7396	14.608
20.9703	8.8386	19.481
21.0842	9.1968	17.499
21.1982	9.6828	13.588
21.3122	8.9109	9.368
21.4261	8.5433	9.931
21.5401	9.2473	10.351
21.6541	9.4732	9.74
21.768	8.991	12.02
21.882	8.9184	14.242
21.996	8.173	16.978
22.1099	8	13.299
22.2239	8.0261	12.879
22.3379	8.5819	12.713
22.4519	8.0713	18.931
22.5658	9.9771	17.463
22.6798	9.0152	13.905
22.7938	9.8164	11.998
22.9077	8.0071	11.375
23.0217	8.9858	15.033
23.1357	8.4186	8.954
23.2496	8.9748	9.95
23.3636	8.1612	4.499
23.4776	8	7.784
23.5915	7.0641	6.128
23.7055	7.926	12.852
23.8195	8	9.454
23.9334	8.3789	10.945
24.0474	7.1328	8.659
24.1614	7	12.484
24.2754	7.8761	15.744
24.3893	8.1258	15.458
24.5033	8.2861	13.633
24.6173	7.5808	8.069
24.7312	8.4041	4.469
24.8452	9.535	3.519
24.9592	10.6659	2.067
25.0731	10.1842	3.609
25.1871	8.4073	7.239
25.3011	7.2136	10.289
25.415	7	9.436
25.529	7.4246	5.826
25.643	8.4513	5.2
25.7569	8.2119	5.671
25.8709	7.2808	5.953
25.9849	7	5.017
26.0989	7.7166	6.096
26.2128	8.282	7.083
26.3268	8.1638	6.92
26.4408	7.3133	5.265
26.5547	7	5.227
26.6687	7.6418	5.925
26.7827	7.3433	8.627
26.8966	7	10
27.0106	7	11.764
27.1246	7.2971	10.545
27.2385	7.9499	7.277
27.3525	7.702	4.786
27.4665	7.072	5.255
27.5804	7.0156	9.701
27.6944	7.2304	12.727
27.8084	8.5053	12.351
27.9224	10.0692	10.907
28.0363	10.653	8.906
28.1503	10.2568	7.147
28.2643	9.442	5.924
28.3782	10.0708	5.117
28.4922	10.8902	5.008
28.6062	10.6427	6.919
28.7201	9.2829	9.467
28.8341	8	9.423
28.9481	7.6356	6.86
29.062	6.6219	4.157
29.176	6.4538	1.877
29.29	6.8861	1.772
29.4039	7.8548	3.148
29.5179	9	6.208
29.6319	9.2547	8.5
29.7459	9.2755	9.436
29.8598	8.8137	10.847
29.9738	9	11.869
30.0878	8.6324	10.788
30.2017	7.7602	10.236
30.3157	7.8179	10.245
30.4297	8.6112	8.81
30.5436	9.0797	6.852
30.6576	9.6092	6.121
30.7716	9.3077	9.865
30.8855	9.948	9.897
30.9995	9.5937	9.587
31.1135	9.0873	6.682
31.2274	8.9655	8.64
31.3414	9.1944	11.468
31.4554	8.97	13.02
31.5694	9	11.96
31.6833	9	11.223
31.7973	9.0657	9.57
31.9113	9.3504	9.298
32.0252	9	9.23
32.1392	8.7276	10.824
32.2532	7.424	11.644
32.3671	7.9941	10.334
32.4811	8.0114	11.167
32.5951	8.755	8.575
32.709	9.1382	9.133
32.823	10	11.506
32.937	10.0343	13.931
33.0509	10.1489	13.453
33.1649	10.204	11.574
33.2789	12.0444	7.67
33.3929	11.3876	4.547
33.5068	12.5053	4.966
33.6208	11.5879	7.28
33.7348	12.2956	9.806
33.8487	10.668	6.013
33.9627	10.9074	5.988
34.0767	10.1167	4.27
34.1906	10	6.013
34.3046	10	7.197
34.4186	10.4533	10.129
34.5325	10.6286	13.309
34.6465	9.5561	15.241
34.7605	9.0733	12.159
34.8744	9.0054	10.092
34.9884	9.9388	9.045
35.1024	10	10.686
35.2164	10.9189	14.731
35.3303	11	12.304
35.4443	10.8285	11.657
35.5583	9.2609	10.122
35.6722	8.121	8.402
35.7862	8.2015	9.799
35.9002	8.0525	10.64
36.0141	9.2851	11.853
36.1281	9.1053	12
36.2421	9.8291	10.342
36.356	9.1286	10
36.47	8.9853	13.391
36.584	9	14.784
36.6979	9	13.857
36.8119	9.7798	12.44
36.9259	9.4424	13.668
37.0399	9.9779	14
37.1538	9.3867	11.119
37.2678	9.6763	8.741
37.3818	9.6472	7.357
37.4957	9.8065	8.818
37.6097	10	7.835
37.7237	10.2612	5.5
37.8376	8.4847	2.028
37.9516	7.2128	4.319
38.0656	7	6
38.1795	7	8.388
38.2935	7	5.44
38.4075	7	4.336
38.5215	7	3.799
38.6354	7.1528	4.441
38.7494	7.0412	5.577
38.8634	7	6.028
38.9773	6.5141	5.792
39.0913	6.317	4.206
39.2053	6.4578	3.606
39.3192	6.2635	4.449
39.4332	6	6.434
39.5472	6	9.08
39.6611	6.5087	9.937
39.7751	6.4021	9.507
39.8891	6.3091	7.768
40.003	7.3879	5.668
40.117	8.373	4.423
40.231	8.509	5.657
40.345	8.0707	8.673
40.4589	8	10.007
40.5729	7.5498	10.296
40.6869	6.5598	9.698
40.8008	6	9.35
40.9148	6.2399	9.159
41.0288	6.83	8.237
41.1427	7	8.978
41.2567	6.6122	10
41.3707	6	10.825
41.4846	6.1019	10.913
41.5986	6.416	10.542
41.7126	6.7122	9.647
41.8265	7.1029	7.89
41.9405	7.1614	9.093
42.0545	6.6999	11.269
42.1684	6	13.047
42.2824	6.3006	11.556
42.3964	7	10.223
42.5104	6.7193	8.22
42.6243	6	6.171
42.7383	6	7.485
42.8523	6.2508	10.155
42.9662	7.1344	10.32
43.0802	7.8098	12.114
43.1942	8	13.66
43.3081	7.7891	16.835
43.4221	7	15.196
43.5361	7.191	11.618
43.65	8	9.982
43.764	7.9233	10.31
43.878	8	11.458
43.992	7.8489	10.503
44.1059	7.0727	9.948
44.2199	7.5699	10.434
44.3339	7.2423	13.401
44.4478	8.9931	12.472
44.5618	9.1718	15.454
44.6758	9.8175	12.182
44.7897	7.9187	13.837
44.9037	6.9644	12.071
45.0177	6.7033	13.363
45.1316	7.7829	15.029
45.2456	7.9237	13.778
45.3596	7.9374	16.196
45.4735	8	14.856
45.5875	8.004	16.701
45.7015	8.4857	17.946
45.8155	7.6365	16.021
45.9294	8.7505	14.037
46.0434	8.9974	10.289
46.1574	9	11.931
46.2713	8.0483	13.539
46.3853	8	13.335
46.4993	7.5092	13.935
46.6132	8.8915	14
46.7272	7.3999	13.553
46.8412	7.1042	15.595
46.9551	6.1449	17.849
47.0691	6.4908	21.569
47.1831	6.6777	20.256
47.297	7.7805	16.552
47.411	7.689	12.592
47.525	8.365	11.564
47.639	8.8621	19.055
47.7529	8.178	20.992
47.8669	8	21
47.9809	7.1979	13.781
48.0948	7	12.706
48.2088	7	12.525
48.3228	7.2107	14.453
48.4367	7.8942	15.673
48.5507	8.7434	17.469
48.6647	8.9614	17.401
48.7786	8.7872	15.799
48.8926	8.2569	20.094
49.0066	7.1431	23.523
49.1205	7.7769	25.841
49.2345	8.247	20.899
49.3485	8.6822	17.991
49.4625	7.6106	16.927
49.5764	8.325	15.228
49.6904	8.3475	13.53
49.8044	9.5689	14.402
49.9183	9.8585	17.044
50.0323	9.8429	19.046
50.1463	9.3947	18.737
50.2602	8.3973	17.756
50.3742	7.4073	15.978
50.4882	7.3476	12.055
50.6021	7.4556	10.446
50.7161	7.8775	11.401
50.8301	8.6305	11.808
50.944	9.5428	11.934
51.058	9.3593	13.066
51.172	8.7513	14.786
51.286	8.2973	13.396
51.3999	8.5029	9.339
51.5139	9.162	8.301
51.6279	9.0971	11.286
51.7418	8.9778	14.044
51.8558	9.0939	15.114
51.9698	9.2348	15.138
52.0837	9.6523	12.695
52.1977	10	10.267
52.3117	10.4232	8.556
52.4256	10.257	10.756
52.5396	9.4396	12.879
52.6536	10.3933	14.194
52.7675	11	13.064
52.8815	10.7617	11.277
52.9955	10.1393	12.813
53.1095	9.8708	17.413
53.2234	10.3734	19.461
53.3374	10.3334	17.433
53.4514	10.6979	15.217
53.5653	9.8934	14.911
53.6793	9.3478	14.786
53.7933	9.6388	12.3
53.9072	10.2836	12.531
54.0212	10.9372	12.547
54.1352	10.9113	13.566
54.2491	10.5059	12.716
54.3631	9.5393	13.797
54.4771	10.3323	11.647
54.591	10.0506	13.185
54.705	9.6045	15.019
54.819	8.8458	18.999
54.933	8.2965	20.553
55.0469	9.0693	19.153
55.1609	9.1791	19.418
55.2749	9.1036	18.885
55.3888	8	22.862
55.5028	8.0866	22.934
55.6168	8.8765	22.577
55.7307	9.9929	16.175
55.8447	10.8832	16.091
55.9587	9.6267	16.678
56.0726	7.7881	19.142
56.1866	8.5532	16.044
56.3006	8.3817	13.736
56.4146	7.9532	14.671
56.5285	7.239	16.247
56.6425	9.0005	16
56.7565	9.1803	15.873
56.8704	9.9828	12.598
56.9844	9.4267	13.732
57.0984	9	14.32
57.2123	9	19.971
57.3263	10.8266	20.285
57.4403	10.9999	20
57.5542	12.6412	16.223
57.6682	11.6161	15.039
57.7822	10.408	17.184
57.8961	9.2291	16.33
58.0101	9.3316	17.597
58.1241	11.1235	16.475
58.238	11.9634	16
58.352	11.3106	16
58.466	11	14.694
58.58	11.6166	14.824
58.6939	12.5802	14.711
58.8079	12.1424	16.361
58.9219	11.2975	18
59.0358	11.9572	18.942
59.1498	14.3037	20
59.2638	17.5204	21.231
59.3777	21.9303	27.807
59.4917	27.0841	37.797
59.6057	31.4821	45.89
59.7196	33.7015	58.693
59.8336	35.3512	76.526
59.9476	36.6755	85.03
60.0616	37.9859	85.113
60.1755	41.8677	70.61
60.2895	43.1308	72.671
60.4035	44.9273	78.771
60.5174	45.5701	90.974
60.6314	46.9955	93.208
60.7454	47.6222	93.138
60.8593	47.8902	87.405
60.9733	51.0392	86.664
61.0873	50.8369	89.856
61.2012	51.1015	89.371
61.3152	49.8988	91.015
61.4292	50.3084	87.845
61.5431	51.1457	92.574
61.6571	51.7346	97.523
61.7711	52.6597	101.884
61.8851	53.0868	102.084
61.999	53.5061	104.174
62.113	54.5097	108.193
62.227	55.1471	108.353
62.3409	54.5236	111.869
62.4549	54.3877	116.281
62.5689	56.6569	122.015
62.6828	59.6146	122.944
62.7968	60.0682	118.339
62.9108	57.6486	112.397
63.0247	59.0585	109.333
63.1387	58.8254	107.458
63.2527	57.5936	104.614
63.3666	51.7921	110.535
63.4806	53.6681	122.247
63.5946	56.5978	128.588
63.7086	57.8629	128.834
63.8225	58.0374	119.603
63.9365	57.8091	115.805
64.0505	56.6281	111.646
64.1644	57.0623	118.503
64.2784	60.9284	126.415
64.3924	62.1496	131.966
64.5063	60.4085	128.922
64.6203	58.9903	126.066
64.7343	59.3914	123.923
64.8482	62.8787	124.939
64.9622	63.9003	126.328
65.0762	64.1732	125.57
65.1901	63.1337	124.192
65.3041	62.0243	129.481
65.4181	61.2998	135.902
65.5321	60.3873	136.748
65.646	60.1291	132.74
65.76	58.277	138.233
65.874	58.3752	138.707
65.9879	58.5484	138.573
66.1019	60.6081	138.895
66.2159	61.3873	140.942
66.3298	60.568	141.494
66.4438	60.8671	130.258
66.5578	62.3496	121.833
66.6717	63.9575	115.966
66.7857	62.9254	109.5
66.8997	60.6998	108.146
67.0136	58.6652	119.122
67.1276	59.3114	129.443
67.2416	56.599	127.905
67.3556	56.209	117.45
67.4695	56.155	120.305
67.5835	59.5446	121.614
67.6975	61.7214	121.618
67.8114	63.1169	120.122
67.9254	61.8878	124.023
68.0394	60.8351	130.318
68.1533	60.3131	137.853
68.2673	59.4955	135.676
68.3813	58.0486	129.981
68.4952	55.6202	133.457
68.6092	56.571	138.213
68.7232	57.983	137.725
68.8372	57.4663	130.894
68.9511	55.3941	129.216
69.0651	54.731	134.388
69.1791	55.4442	135.473
69.293	56.5193	128.452
69.407	57.4049	116.296
69.521	54.4096	113.946
69.6349	52.2098	113.305
69.7489	50.8473	120.788
69.8629	53.3014	118.77
69.9768	55.3681	120.286
70.0908	54.735	118.323
70.2048	50.5329	122.712
70.3187	49.1336	116.709
70.4327	49.7908	109.083
70.5467	51.2811	105.151
70.6606	51.9858	99.209
70.7746	50.7221	97.598
70.8886	49.2238	92.928
71.0026	49.5483	89.19
71.1165	50.6295	83.476
71.2305	49.2477	82.286
71.3445	47.8994	84.386
71.4584	46.6113	90.841
71.5724	45.4914	99.866
71.6864	46.2971	105.429
71.8003	47.7081	98.958
71.9143	49.0837	88.2
72.0283	48.8012	84.261
72.1422	46.4221	86.518
72.2562	46.7647	86.703
72.3702	44.211	83.509
72.4841	45.0736	81.476
72.5981	45.24	79.017
72.7121	46.9544	81.693
72.8261	44.5808	80.412
72.94	43.3507	88.362
73.054	45.3543	79.07
73.168	46.917	81.421
73.2819	47.1351	82.492
73.3959	43.5166	88.074
73.5099	42.0792	91.749
73.6238	41.9809	85.853
73.7378	43.0046	79.756
73.8518	44.606	81.089
73.9657	44.6279	83.759
74.0797	44.5344	82.903
74.1937	42.4314	84.154
74.3076	40.0583	84.893
74.4216	38.1796	80.468
74.5356	37.2724	73.21
74.6496	35.8912	63.558
74.7635	33.5052	54
74.8775	29.6695	47.356
74.9915	27.1582	44.179
75.1054	22.3882	36.382
75.2194	16.9828	29.002
75.3334	13.2975	23.602
75.4473	10.5175	19.724
75.5613	9.7911	15.805
75.6753	8.4132	10.448
75.7892	7.843	9.709
75.9032	7	7.762
76.0172	7	7.142
76.1311	6.992	6.293
76.2451	6.0269	4.5
76.3591	5.6437	8.107
76.4731	6.2526	6.92
76.587	6.0116	6.079
76.701	6	4.71
76.815	6.4352	5.058
76.9289	6.2827	4.565
77.0429	6.7336	5.445
77.1569	6.748	7.02
77.2708	6.4806	5.67
77.3848	6.0834	4.426
77.4988	6	5.207
77.6127	6	6.643
77.7267	6.2943	7.767
77.8407	6.4595	8.632
77.9547	5.5022	7.894
78.0686	4.8473	5.961
78.1826	4.5747	3.292
78.2966	5	2.683
78.4105	5.0544	3.329
78.5245	5.3478	1.569
78.6385	4.9433	2.848
78.7524	4.9962	4.344
78.8664	5.3628	6.271
78.9804	6	8
79.0943	5.9499	7.874
79.2083	5.0247	5.944
79.3223	5.661	3.362
79.4362	5.0186	0.893
79.5502	5.7953	3.935
79.6642	5.1192	3.731
79.7782	5.5051	3.875
79.8921	5.0635	4
80.0061	5.7716	6.989
