# Supplementary material for: RPG acts as a central determinant for infectosome formation and cellular polarization during intracellular rhizobial infections
Source: eLife journal article supplement (doi:10.7554/elife.80741), 2023-02-22
Supplement: fig3-figsupp5-data1 [file elife-80741-fig3-figsupp5-data1-v2.zip]

## Sheet: Fig3-suppl 5-panel A_FLIM fit
Fig 3 - fig suppl 5 - focal plane 1	Number	Channel	Region	Tail Offset Cnts	Amplitude 1 kCnts	Amplitude 2 kCnts	Lifetime (τ) 1 ns	Lifetime (τ) 2 ns	IRF Background Cnts	IRF Shift ns	Intensity 1 kCnts	Intensity 2 kCnts	Sum Amplitudes kCnts	Sum Intensity kCnts	Mean τ, Intensity Weighted ns	Mean τ, Amplitude Weighted ns	χ²
	1	HyD 4_1	Overall Decay	10304.8	152.695	42.6011	0.331425	2.5313	0	0	521.884	1112	195.296	1633.88	1.82863	0.811297	6.46461
	2	HyD 4_1	ROI 1 IT tip	1.13824	0.127762		2.47391		0	0	3.25932		0.127762	3.25932	2.47391	2.47391	0.957089
	3	HyD 4_1	ROI 2 cytoplasm	4.01906	0.191424		2.4954		0	0	4.92582		0.191424	4.92582	2.4954	2.4954	1.20377
	4	HyD 4_2	Overall Decay	20569.2	103.752	68.8884	0.302565	1.38619	0	0	323.728	984.585	172.641	1308.31	1.11806	0.734962	2.07331
	5	HyD 4_2	ROI 1 IT tip	1.9416	0.104649		1.43645		0	0	1.5499		0.104649	1.5499	1.43645	1.43645	1.20077
	6	HyD 4_2	ROI 2 cytoplasm	7.53241	0.0815949		1.31345		0	0	1.10511		0.0815949	1.10511	1.31345	1.31345	0.819449
Fig 3 - fig suppl 5 - focal plane 2	Number	Channel	Region	Tail Offset Cnts	Amplitude 1 kCnts	Amplitude 2 kCnts	Lifetime (τ) 1 ns	Lifetime (τ) 2 ns	IRF Background Cnts	IRF Shift ns	Intensity 1 kCnts	Intensity 2 kCnts	Sum Amplitudes kCnts	Sum Intensity kCnts	Mean τ, Intensity Weighted ns	Mean τ, Amplitude Weighted ns	χ²
	1	HyD 4_1	Overall Decay	10678.6	129.948	38.0953	0.333484	2.53338	0	0	446.898	995.197	168.043	1442.1	1.85164	0.832198	5.04449
	2	HyD 4_1	ROI 1 IT tip	4.13252	0.268		2.57294		0	0	7.11042		0.268	7.11042	2.57294	2.57294	1.17382
	3	HyD 4_1	ROI 2 cytoplasm	6.0766	0.294102		2.37364		0	0	7.19884		0.294102	7.19884	2.37364	2.37364	1.4099
	4	HyD 4_2	Overall Decay	20370.7	87.0684	48.2589	0.302908	1.38033	0	0	271.978	686.829	135.327	958.807	1.07471	0.687127	1.16252
	5	HyD 4_2	ROI 1 IT tip	7.19137	0.431554		1.42725		0	0	6.35071		0.431554	6.35071	1.42725	1.42725	1.01369
	6	HyD 4_2	ROI 2 cytoplasm	11.0221	0.0908755		1.33651		0	0	1.25238		0.0908755	1.25238	1.33651	1.33651	0.612429
Fig 3 - fig suppl 5 - focal plane 3	Number	Channel	Region	Tail Offset Cnts	Amplitude 1 kCnts	Amplitude 2 kCnts	Lifetime (τ) 1 ns	Lifetime (τ) 2 ns	IRF Background Cnts	IRF Shift ns	Intensity 1 kCnts	Intensity 2 kCnts	Sum Amplitudes kCnts	Sum Intensity kCnts	Mean τ, Intensity Weighted ns	Mean τ, Amplitude Weighted ns	χ²
	1	HyD 4_1	Overall Decay	10244.3	97.3203	34.3297	0.362273	2.83108	0	0	363.582	1002.1	131.65	1365.68	2.17382	1.00605	4.13385
	2	HyD 4_1	ROI 1 puncta	1.4243	0.0420248		2.51872		0	0	1.09151		0.0420248	1.09151	2.51872	2.51872	0.959186
	3	HyD 4_1	ROI 2 N RH	68.7623	2.05885		3.23758		0	0	68.7036		2.05885	68.7036	3.23758	3.23758	1.46433
	4	HyD 4_1	ROI 3 N CC	90.5182	1.59421		3.70917		0	0	60.8981		1.59421	60.8981	3.70917	3.70917	1.06991
	5	HyD 4_2	Overall Decay	20666.7	64.5379	35.6143	0.34226	1.41726	0	0	227.791	520.433	100.152	748.223	1.08998	0.724532	1.40654
	6	HyD 4_2	ROI 1 puncta	2.38029	0.0761519		1.44959		0	0	1.13802		0.0761519	1.13802	1.44959	1.44959	0.981149
	7	HyD 4_2	ROI 2 N RH	131.643	0.85368		1.33931		0	0	11.7894		0.85368	11.7894	1.33931	1.33931	0.771006
	8	HyD 4_2	ROI 3 N CC	178.572	0.114067		1.21649		0	0	1.43093		0.114067	1.43093	1.21649	1.21649	1.02086

## Sheet: Fig3-suppl 5_panel C_values
Intensity profile
Distance (microns)	Gray value GFP +NowGFP	Gray value mCherry
0	39.763	3.873
0.1342	37.448	9.367
0.2685	38.868	6.632
0.4027	36.699	5.658
0.5369	37.367	12.062
0.6711	44.158	8.976
0.8054	51.768	7.774
0.9396	60.617	11.493
1.0738	65.774	7.99
1.2081	74.415	18.704
1.3423	85.494	26.071
1.4765	108.916	32.765
1.6107	113.51	62.88
1.745	129.524	67.364
1.8792	136.625	67.879
2.0134	140.702	85.434
2.1477	107.921	52.579
2.2819	87.908	32.648
2.4161	57.828	29.284
2.5503	64.028	18.193
2.6846	52.46	15.039
2.8188	56.223	14.918
2.953	55.648	14.551
3.0872	51.179	13.89
3.2215	45.231	6.594
3.3557	46.806	9.82
3.4899	53.859	10.668
3.6242	50.288	11.448
3.7584	49.804	11.533
3.8926	47.201	11.105
4.0268	43.791	9.641
4.1611	44.121	16.325
4.2953	40.157	8.617
4.4295	37.467	13.229
4.5638	39.823	14.995
4.698	47.305	9.264
4.8322	43.854	11.652
4.9664	38.923	10.792
5.1007	42.696	7.674
5.2349	46.888	8.154
5.3691	50.199	8.756
5.5034	50.314	10.291
5.6376	45.082	10.956
5.7718	43.113	12.845
5.906	39.39	16.122
6.0403	42.531	11.322
6.1745	38.828	8.892
6.3087	46.497	9.061
6.443	37.822	4.89
6.5772	38.614	4.26
6.7114	41.816	8.963
6.8456	39.878	13.602
6.9799	42.032	11.995
7.1141	39.125	8.972
7.2483	37.375	15.102
7.3826	37.579	16.089
7.5168	36.229	18.783
7.651	50.853	33.955
7.7852	54.302	48.547
7.9195	61.284	58.758
8.0537	79.999	86.958
8.1879	78.204	93.423
8.3221	85.741	101.106
8.4564	87.085	102.903
8.5906	74.121	86.665
8.7248	62.313	71.234
8.8591	57.214	57.608
8.9933	49.057	30.43
9.1275	45.178	19.049
9.2617	35.408	16.5
9.396	30.793	13.018
9.5302	32.373	12.897
9.6644	30.176	5.235
9.7987	34.078	6.705
9.9329	27.667	14.348
10.0671	30.025	14.449
10.2013	30.975	8.878
10.3356	28.062	12.39
10.4698	25.801	13.239
10.604	27.609	15.559
10.7383	31.878	12.876
10.8725	25.63	13.772
11.0067	23.754	15.541
11.1409	26.278	12.342
11.2752	34.132	18.781
11.4094	31.013	19.83
11.5436	30.877	16.99
11.6779	31.693	10.984
11.8121	28.02	6.665
11.9463	29.344	9.14
12.0805	24.442	11.518
12.2148	23.109	19.616
12.349	27.071	13.391
12.4832	28.422	14.919
12.6174	33.461	19.833
12.7517	42.174	30.306
12.8859	51.022	33.585
13.0201	49.116	37.392
13.1544	53.233	59.049
13.2886	58.877	57.598
13.4228	61.087	73.032
13.557	78.89	64.909
13.6913	83.026	61.689
13.8255	79.729	69.753
13.9597	76.242	67.298
14.094	61.069	55.445
14.2282	57.468	31.921
14.3624	41.537	25.528
14.4966	35.677	15.806
14.6309	38.252	10.081
14.7651	31.574	13.383
14.8993	32.198	11.341
15.0336	28.095	6.071
15.1678	39.609	5.308
15.302	29.513	5.033
15.4362	34.648	7.382
15.5705	36.546	8.959
15.7047	37.615	6.931
15.8389	37.292	5.56
15.9732	36.564	10.419
16.1074	38.819	13.385
16.2416	42.57	8.26
16.3758	34.34	6.394
16.5101	40.957	6.493
16.6443	51.494	9.081
16.7785	41.754	6.705
16.9128	39.174	6.925
17.047	43.601	5.791
17.1812	37.142	7.817
17.3154	35.481	10.156
17.4497	40.881	7.239
17.5839	41.774	9.843
17.7181	39.199	9.501
17.8523	34.471	6.741
17.9866	42.299	8.532
18.1208	33.488	11.08
18.255	37.286	12.559
18.3893	46.046	11.878
18.5235	44.999	10.161
18.6577	48.183	9.736
18.7919	49.166	6.209
18.9262	49.366	11.587
19.0604	43.319	11.163
19.1946	37.307	10.019
19.3289	47.81	11.022
19.4631	41.327	11.714
19.5973	40.193	11.565
19.7315	40.223	11.148
19.8658	52.38	13.864
20	37.854	11.765
20.1342	50.632	11.563
20.2685	44.271	8.339
20.4027	43.165	9.711
20.5369	59.678	12.775
20.6711	54.329	11.919
20.8054	52.52	9.031
20.9396	42.568	5.736
21.0738	36.849	17.468
21.2081	43.705	12.829
21.3423	43.65	9.119
21.4765	44.321	9.064
21.6107	43.43	8.429
21.745	44.605	10.094
21.8792	42.772	8.212
22.0134	42.432	8.7
22.1477	46.781	9.614
22.2819	50.789	11.971
22.4161	43.029	8.424
22.5503	39.528	6.604
22.6846	36.641	6.529
22.8188	43.59	7.153
22.953	39.129	10.881
23.0872	34.218	4.682
23.2215	38.197	4.729
23.3557	36.337	7.645
23.4899	36.145	5.199
23.6242	36.958	3.748
23.7584	32.372	6.019
23.8926	35.878	4.905
24.0268	27.178	7.252
24.1611	31.187	6.185
24.2953	29.773	7.342
24.4295	24.358	5.293
24.5638	22.084	6.703
24.698	21.908	9.381
24.8322	21.352	8.006
24.9664	31.809	8.555
25.1007	30.429	8.466
25.2349	20.696	13.383
25.3691	26.78	13.327
25.5034	24.941	10.317
25.6376	21.201	9.139
25.7718	19.339	13.672
25.906	20.423	26.753
26.0403	26.803	36.897
26.1745	38.551	43.851
26.3087	38.555	43.846
26.443	28.686	43.953
26.5772	33.728	37.179
26.7114	26.247	23.893
26.8456	21.571	12.038
26.9799	22.299	2.708
27.1141	12.786	0
27.2483	8.953	1.333
27.3826	12.232	2.662
27.5168	4.695	0.578
27.651	11.299	0.571
27.7852	10.095	0.014
27.9195	5.731	0
28.0537	12.891	0
28.1879	10.145	1.18
28.3221	14.48	0.501
28.4564	9.833	0
28.5906	6.158	0
28.7248	7.552	0
28.8591	7.148	0
28.9933	11.192	1.037
29.1275	13.835	1.959
29.2617	16.208	0.831
29.396	15.262	0.406
29.5302	8.916	0.492
29.6644	9.717	0
29.7987	15.332	0.211
29.9329	15.327	0.057
30.0671	10.283	0
30.2013	9.701	0
30.3356	13.159	0
30.4698	10.44	0
30.604	8.69	0
30.7383	8.588	0.583
30.8725	5.086	0.613
31.0067	5.411	2.349
31.1409	8.754	2.34
31.2752	8.54	0.14
31.4094	6.499	0.364
31.5436	3.718	0
31.6779	3.036	0
31.8121	7.7	0
31.9463	7.005	0
32.0805	3.878	0
32.2148	3.536	0
32.349	3.663	0.031
32.4832	7.678	1.067
32.6175	11.68	1.84
32.7517	9.312	0
32.8859	7.478	0
33.0201	6.657	0
33.1544	1.971	0
33.2886	5.485	0
33.4228	3.954	0
33.557	4.411	0
33.6913	4.869	0.124
33.8255	0.576	0
33.9597	4.729	0
34.094	8.387	0.008
34.2282	10.46	0.155
34.3624	1.931	0
34.4966	1.376	0
34.6309	0.05	0
34.7651	10.497	0
34.8993	6.193	0
35.0336	8.764	0
35.1678	1.591	0
35.302	7.797	0
35.4362	6.584	0.299
35.5705	5.752	0.028
35.7047	3.512	0
35.8389	5.703	0
35.9732	9.777	0.116
36.1074	10.951	2.434
36.2416	7.959	0.442
36.3758	7.436	0
36.5101	5.992	0
36.6443	4.795	0
36.7785	1.208	0
36.9128	6.48	0
37.047	6.804	0
37.1812	5.97	1.524
37.3154	4.771	0.446
37.4497	8.759	0
37.5839	6.072	0
37.7181	2.389	0
37.8523	10.88	0
37.9866	10.819	0
38.1208	5.841	0
38.255	6.3	0
38.3893	6.544	0
38.5235	4.304	0
38.6577	5.007	0
38.7919	7.589	0
38.9262	8.966	0
39.0604	8.007	0
39.1946	7.878	0.263
39.3289	8.439	0.703
39.4631	7.742	0.146
39.5973	10.136	0.266
39.7315	13.619	0.082
39.8658	9.821	0
40	6.097	0
40.1342	8.283	0
40.2685	8.15	0
40.4027	8.358	0
40.5369	13.624	0
40.6711	9.884	0
40.8054	8.982	0
40.9396	9.698	0
41.0738	11.668	0
41.2081	11.059	0.196
41.3423	6.65	1.438
41.4765	11.387	2.099
41.6107	11.704	0.926
41.745	10.17	0.036
41.8792	12.16	0.118
42.0134	12.971	0
42.1477	12.863	0.071
42.2819	20.704	0.499
42.4161	15.41	0.888
42.5503	10.417	0.147
42.6846	10.425	2.666
42.8188	5.499	0.115
42.953	12.048	0
43.0872	11.786	0
43.2215	11.539	0
43.3557	10.142	0
43.4899	16.228	0
43.6242	14.278	0
43.7584	8.283	0
43.8926	7.852	0
44.0268	9.609	0.143
44.1611	6.874	1.15
44.2953	11.119	0.056
44.4295	8.602	0
44.5638	10.611	0
44.698	10.796	0
44.8322	10.123	0.073
44.9664	17.37	0.265
45.1007	11.388	0.127
45.2349	13.925	0.501
45.3691	12.571	0.705
45.5034	13.118	0.303
45.6376	15.422	0.011
45.7718	19.435	2.837
45.906	17.101	0.94
46.0403	13.667	0.016
46.1745	12.97	0
46.3087	14.43	0
46.443	12.024	0
46.5772	11.446	0
46.7114	13.899	0
46.8456	14.894	0.635
46.9799	20.701	1.873
47.1141	23.47	0.027
47.2483	15.871	0.44
47.3825	17.012	3.779
47.5168	26.776	1.446
47.651	20.913	0
47.7852	20.843	0
47.9195	25.622	0.151
48.0537	23.635	0
48.1879	22.599	0
48.3221	20.138	0
48.4564	23.462	0
48.5906	22.414	0
48.7248	25.174	0
48.8591	24.237	0
48.9933	31.948	0.068
49.1275	22.06	0
49.2617	17.913	0
49.396	23.689	0
49.5302	19.168	0.395
49.6644	18.021	0.059
49.7987	16.563	0
49.9329	15.995	0
50.0671	17.423	0
50.2013	13.22	0.787
50.3356	16.816	2.278
50.4698	16.588	0.642
50.604	14.15	0
50.7383	11.82	0
50.8725	15.936	0
51.0067	16.189	0
51.1409	15.132	0
51.2752	15.367	0
51.4094	17.214	0
51.5436	11.955	0
51.6779	18.088	0
51.8121	18.168	0
51.9463	12.652	0
52.0805	4.91	0
52.2148	9.721	0
52.349	10.631	0
52.4832	9.206	0.121
52.6175	17.426	0.192
52.7517	12.3	0.461
52.8859	15.504	0.003
53.0201	14.972	0.096
53.1544	16.975	0
53.2886	14.698	0
53.4228	15.049	0.766
53.557	21.075	0.254
53.6913	15.738	0.53
53.8255	19.548	0
53.9597	23.82	0
54.094	22.709	0
54.2282	23.828	0
54.3624	16.329	0
54.4966	16.799	0
54.6309	18.154	0
54.7651	16.46	0.118
54.8993	16.839	0
55.0336	17.302	0
55.1678	23.214	0.188
55.302	25.659	0
55.4362	23.085	0.723
55.5705	20.604	1.016
55.7047	20.408	0
55.8389	17.207	0
55.9732	19.607	0
56.1074	24.031	0
56.2416	17.639	0
56.3758	17.217	0.055
56.5101	19.146	0
56.6443	12.629	0
56.7785	13.419	0
56.9128	16.718	0
57.047	15.842	0.385
57.1812	9.062	0.569
57.3154	11.785	0
57.4497	12.872	0
57.5839	9.653	1.256
57.7181	6.012	0
57.8523	10.88	0
57.9866	8.047	0
58.1208	6.427	0
58.255	3.701	0.965
58.3893	4.751	0
58.5235	3.475	0
58.6577	1.393	0
58.7919	0	1.749
58.9262	0.765	2.206
59.0604	0	0
59.1946	0	0
59.3289	0	0
59.4631	0	0
59.5973	0	0
59.7315	0.051	0.226
59.8658	0	0
60	0	0
