# Supplementary material for: RPG acts as a central determinant for infectosome formation and cellular polarization during intracellular rhizobial infections
Source: eLife journal article supplement (doi:10.7554/elife.80741), 2023-02-22
Supplement: fig3-figsupp6-data1 [file elife-80741-fig3-figsupp6-data1-v2.zip]

## Sheet: Fig 3 Suppl 6A_FLIM fit
Fig 3 - fig suppl 6A	Number	Channel	Region	Tail Offset Cnts	Amplitude 1 kCnts	Amplitude 2 kCnts	Amplitude 3 kCnts	Lifetime (τ) 1 ns	Lifetime (τ) 2 ns	Lifetime (τ) 3 ns	IRF Background Cnts	IRF Shift ns	Intensity 1 kCnts	Intensity 2 kCnts	Intensity 3 kCnts	Sum Amplitudes kCnts	Sum Intensity kCnts	Mean τ, Intensity Weighted ns	Mean τ, Amplitude Weighted ns	χ²
	1	HyD 4_1	Overall Decay	0	253.569	93.339	29.4696	0.236152	0.870487	2.96134	0	0	617.521	837.894	884.451	376.377	2339.87	1.4934	0.60684	32.2201
	2	HyD 4_2	Overall Decay	30.6871	39.742	37.621	92.3902	0.428086	1.55652	3.48709	0	0	175.447	603.878	3320	169.753	4099.33	3.07177	2.34307	0.914327

## Sheet: Fig 3 Suppl 6B_values
Intenisty profile
Distance (micron)	Gray value GFP	Gray value mCherry
0	5.529	8.113
0.1415	6.391	6.418
0.283	6.043	5.887
0.4245	9.113	6.503
0.566	9.579	6.469
0.7075	7.464	6.173
0.8491	4.999	6.85
0.9906	4.914	7.674
1.1321	6.459	9.843
1.2736	7.012	12.429
1.4151	6.034	13.57
1.5566	5.144	15.458
1.6981	5.01	17.195
1.8396	5.924	18.68
1.9811	6.218	17.399
2.1226	5.347	16.879
2.2642	6.042	17.396
2.4057	9.422	19.004
2.5472	15.728	17.421
2.6887	26.745	19.899
2.8302	49.863	30.762
2.9717	102.022	45.388
3.1132	189.528	67.304
3.2547	291.531	77.448
3.3962	392.19	80.586
3.5377	464.042	69.983
3.6792	528.684	65.595
3.8208	570.563	75.405
3.9623	600.358	82.987
4.1038	613.996	85.942
4.2453	591.859	77.902
4.3868	508.262	58.753
4.5283	378.156	38.135
4.6698	244.176	25.751
4.8113	148.944	23.938
4.9528	98.239	21.639
5.0943	81.289	25.053
5.2358	85.891	29.602
5.3774	127.408	36.312
5.5189	213.712	46.077
5.6604	317.532	54.122
5.8019	393.886	61.802
5.9434	434.979	71.635
6.0849	453.441	80.46
6.2264	463.602	83.48
6.3679	445.167	79.141
6.5094	374.66	61.736
6.6509	283.3	50.442
6.7925	190.977	38.619
6.934	124.499	39.956
7.0755	74.785	39.855
7.217	38.252	40.971
7.3585	20.99	32.582
7.5	16.604	40.608
7.6415	16.102	23.516
7.783	10.837	17.031
7.9245	11.639	17.751
8.066	10.148	28.587
8.2075	7.665	28.909
8.3491	7.916	29.841
8.4906	9.235	28.344
8.6321	13.678	30.079
8.7736	21.163	29.352
8.9151	34.466	37.46
9.0566	59.331	51.399
9.1981	103.189	59.741
9.3396	168.881	61.577
9.4811	248.716	74.305
9.6226	332.603	87.336
9.7642	399.622	96.666
9.9057	454.112	95.491
10.0472	478.348	82.394
10.1887	458.074	80.595
10.3302	385.442	72.712
10.4717	274.405	59.479
10.6132	165.223	39.612
10.7547	80.644	36.703
10.8962	37.912	36.033
11.0377	18.014	33.488
11.1792	11.685	29.99
11.3208	11.53	28.253
11.4623	11.701	24.775
11.6038	10.375	22.171
11.7453	7.669	20.915
11.8868	6.207	16.082
12.0283	7.152	13.125
12.1698	8.33	14.113
12.3113	8.043	13.751
12.4528	8.617	12.593
12.5943	7.775	11.369
12.7359	7.047	10.602
12.8774	7.782	7.024
13.0189	8.706	5.88
13.1604	9.75	7.224
13.3019	8.584	6.337
13.4434	7.221	5.301
13.5849	6.812	5.543
13.7264	5.901	6.04
13.8679	5.239	5.942
14.0094	5.155	4.127
14.1509	5.077	5.838
14.2925	4.87	5.71
14.434	3.594	5.149
14.5755	1.703	5.719
14.717	0.419	6.192
14.8585	0.361	6.267
15	0.216	5.106
15.1415	0.414	4.036
15.283	0.117	3.638
15.4245	0	4.362
15.566	0.073	5.7
15.7075	0.206	5.137
15.8491	0.01	2.977
15.9906	0.059	3.031
16.1321	0	2.908
16.2736	0	1.466
16.4151	0	0.726
16.5566	0	0.791
16.6981	0	1.7
16.8396	0	1.041
16.9811	0	0.791
17.1226	0	0.586
17.2642	0	0.109
17.4057	0	0.493
17.5472	0.266	0.496
17.6887	0.449	0.381
17.8302	0.444	1.215
17.9717	0.205	1.395
18.1132	0	1.632
18.2547	0	2.052
18.3962	0	2.021
18.5377	0.216	2.178
18.6792	0.119	2.076
18.8208	0.154	2.194
18.9623	0.207	2.805
19.1038	0.581	3.076
19.2453	0.698	4.051
19.3868	0.357	6.429
19.5283	0.032	6.174
19.6698	0.042	6.238
19.8113	0.107	6.501
19.9528	0.862	4.77
20.0943	1.168	4.252
20.2359	1.544	3.578
20.3774	1.524	3.006
20.5189	1.613	2.044
20.6604	2.478	1.651
20.8019	2.977	2.221
20.9434	3.098	1.924
21.0849	3.646	2.318
21.2264	4.471	2.298
21.3679	4.767	1.4
21.5094	5.707	1.704
21.6509	5.514	2.881
21.7925	5.219	3.513
21.934	5.594	3.017
22.0755	5.613	2.086
22.217	6.048	0.376
22.3585	5.893	0.175
22.5	6.932	0.905
22.6415	6.757	1.918
22.783	5.949	2.774
22.9245	4.828	2.589
23.066	4.497	3.208
23.2076	4.305	3.647
23.3491	4.673	3.297
23.4906	3.632	4.103
23.6321	2.495	4.616
23.7736	2.804	6.605
23.9151	3.527	7.156
24.0566	5.112	8.033
24.1981	6.838	6.786
24.3396	15.909	6.991
24.4811	46.635	13.473
24.6226	122.688	26.214
24.7642	250.786	43.85
24.9057	418.686	60.252
25.0472	566.235	81.119
25.1887	671.337	99.219
25.3302	737.881	115.21
25.4717	741.889	116.629
25.6132	669.138	93.687
25.7547	571.69	76.986
25.8962	489.62	67.955
26.0377	433.332	69.415
26.1792	401.126	68.95
26.3208	375.328	70.716
26.4623	326.136	66.419
26.6038	245.803	49.835
26.7453	161.025	34.248
26.8868	86.074	21.925
27.0283	38.58	13.402
27.1698	16.861	6.972
27.3113	8.796	6.38
27.4528	7.774	7.011
27.5943	8.191	6.312
27.7359	8.438	6.658
27.8774	6.426	7.596
28.0189	4.121	9.063
28.1604	5.264	10.918
28.3019	6.46	10.042
28.4434	5.621	7.404
28.5849	5.156	7.966
28.7264	4.866	4.897
28.8679	5.446	3.864
29.0094	6.048	3.746
29.1509	6.274	4.057
29.2925	6.085	4.894
29.434	4.561	4.772
29.5755	5.668	4.97
29.717	4.587	4.558
29.8585	4.3	4.753
30	4.3	3.693
30.1415	5.802	4.223
30.283	5.494	4.504
30.4245	4.977	4.523
30.566	5.893	6.548
30.7076	6.249	6.716
30.8491	5.991	5.702
30.9906	5.965	3.345
31.1321	6.687	4.501
31.2736	6.439	6.015
31.4151	6.081	7.396
31.5566	5.87	8.369
31.6981	5.758	8.623
31.8396	6.057	6.571
31.9811	5.01	5.457
32.1226	4.322	5.096
32.2642	3.388	3.756
32.4057	4.228	3.46
32.5472	5.628	4.261
32.6887	5.057	4.59
32.8302	4.301	3.149
32.9717	4.372	3.18
33.1132	5.224	4.671
33.2547	6.097	6.7
33.3962	7.582	7.412
33.5377	9.032	7.001
33.6792	12.731	7.116
33.8208	15.472	8.056
33.9623	25.18	9.123
34.1038	48.535	11.012
34.2453	92.706	24.233
34.3868	150.888	38.862
34.5283	221.391	57.72
34.6698	324.579	74.21
34.8113	444.472	99.99
34.9528	569.522	130.556
35.0943	678.563	157.699
35.2359	712.668	186.26
35.3774	710.041	189.964
35.5189	691.192	177.199
35.6604	623.648	151.48
35.8019	492.095	113.586
35.9434	356.185	80.392
36.0849	256.839	53.868
36.2264	220.108	31.959
36.3679	207.855	23.011
36.5094	196.711	20.447
36.6509	185.6	18.161
36.7925	173.442	14.529
36.934	159.325	12.247
37.0755	140.738	14.787
37.217	130.536	12.24
37.3585	119.421	8.213
37.5	106.958	6.463
37.6415	100.107	7.412
37.783	93.522	9.263
37.9245	98.414	9.862
38.066	108.333	10.087
38.2076	131.717	14.38
38.3491	158.966	23.902
38.4906	160.986	29.955
38.6321	130.25	31.07
38.7736	94.896	25.618
38.9151	64.348	19.671
39.0566	46.176	14.365
39.1981	36.89	13.095
39.3396	34.689	8.914

## Sheet: Fig 3 Suppl 6C_percentage
Plant	iRH	GFP+mCherry	GFP only	mCherry only
1	RH 1	5	0	0
1	RH 2	9	0	0
2	RH 3	3	2	0
2	RH 4	1	2	0
3	RH 5	4	1	0
3	RH 6	3	1	0
3	RH 7	6	0	1
4	RH 8	1	2	0
4	RH 10	1	3	0
5	RH 11	2	0	0
6	RH 12	2	0	0
7	RH 13	1	0	0
8	RH 14	2	0	0
6	RH 15	1	0	0
		41	11	1	number
		77.3585	20.7547	1.88679	%
