# Supplementary material for: RPG acts as a central determinant for infectosome formation and cellular polarization during intracellular rhizobial infections
Source: eLife journal article supplement (doi:10.7554/elife.80741), 2023-02-22
Supplement: fig4-data1 [file Figure 4D - source data 1.xlsx]

## Sheet: Fig 4D-left panel
Fig 4D -left panel	Number	Channel	Region	Tail Offset Cnts	Amplitude 1 kCnts	Amplitude 2 kCnts	Lifetime (τ) 1 ns	Lifetime (τ) 2 ns	IRF Background Cnts	IRF Shift ns	Intensity 1 kCnts	Intensity 2 kCnts	Sum Amplitudes kCnts	Sum Intensity kCnts	Mean τ, Intensity Weighted ns	Mean τ, Amplitude Weighted ns	χ²
	1	HyD 4_1	Overall Decay	44.7584	6.66589	8.62331	0.305611	2.51669	0	0	21.0083	221.847	15.2892	242.855	2.32542	1.55269	1.10188
	2	HyD 4_2	Overall Decay	19.6934	7.40705		3.15127		0	0	240.323		7.40705	240.323	3.15127	3.15127	2.7828
Intensity profile
Distance (microns)	Gray value GFP
0	0
0.0709	0
0.1418	0
0.2128	0
0.2837	0
0.3546	0
0.4255	0
0.4965	0
0.5674	0
0.6383	0
0.7092	0
0.7801	0
0.8511	0
0.922	0.72567
0.9929	1.82067
1.0638	0.66999
1.1348	3.75079
1.2057	3.74218
1.2766	2.95009
1.3475	3.32515
1.4184	3.25675
1.4894	3.22424
1.5603	0.90946
1.6312	3.52338
1.7021	3.9368
1.773	3.84137
1.844	4.79798
1.9149	5.78022
1.9858	6.42622
2.0567	5.93497
2.1277	5.53373
2.1986	3.36682
2.2695	3.34684
2.3404	3.73315
2.4113	4.45699
2.4823	5.20936
2.5532	5.65349
2.6241	2.85759
2.695	0.78078
2.766	3.22551
2.8369	0.82734
2.9078	6.26073
2.9787	4.14369
3.0496	2.27958
3.1206	2.66157
3.1915	2.72278
3.2624	5.50471
3.3333	7.39321
3.4043	4.58755
3.4752	4.37696
3.5461	3.23887
3.617	3.60957
3.6879	8.40812
3.7589	2.92742
3.8298	2.48244
3.9007	3.22811
3.9716	2.56056
4.0426	3.60074
4.1135	4.67116
4.1844	6.72904
4.2553	3.10907
4.3262	2.41331
4.3972	4.2384
4.4681	1.78004
4.539	4.50611
4.6099	2.96029
4.6809	6.74782
4.7518	3.49413
4.8227	1.45636
4.8936	3.75842
4.9645	4.83288
5.0355	6.17379
5.1064	2.01743
5.1773	5.97527
5.2482	4.64581
5.3191	2.86733
5.3901	1.23467
5.461	0.29259
5.5319	3.23442
5.6028	5.32953
5.6738	3.26626
5.7447	2.47741
5.8156	0.02408
5.8865	1.30507
5.9574	3.45757
6.0284	4.37524
6.0993	3.71901
6.1702	2.79897
6.2411	2.29535
6.3121	1.00258
6.383	0.37694
6.4539	1.2523
6.5248	1.73483
6.5957	0.96004
6.6667	4.08578
6.7376	4.65542
6.8085	2.51719
6.8794	2.58014
6.9504	1.995
7.0213	4.04756
7.0922	3.81624
7.1631	2.17226
7.234	1.72428
7.305	0
7.3759	1.49357
7.4468	1.95667
7.5177	1.248e-11
7.5887	1.76743
7.6596	0
7.7305	0.37714
7.8014	0.6031
7.8723	0
7.9433	0
8.0142	0
8.0851	0
8.156	0.03252
8.227	2.88756
8.2979	0.53844
8.3688	0.12966
8.4397	0.16081
8.5106	2.73105
8.5816	1.49909
8.6525	1.82039
8.7234	3.55194
8.7943	0
8.8652	0
8.9362	0.25191
9.0071	1.23145
9.078	2.35145
9.1489	1.45853
9.2199	3.17211
9.2908	0.63943
9.3617	1.22127
9.4326	0
9.5035	0
9.5745	1.04153
9.6454	4.98861
9.7163	2.89914
9.7872	0.89397
9.8582	2.00403
9.9291	0.46718
10	0
10.0709	0
10.1418	1.0009
10.2128	1.50618
10.2837	2.2363
10.3546	1.34842
10.4255	5.55928
10.4965	3.22068
10.5674	4.44611
10.6383	4.39633
10.7092	3.79274
10.7801	1.05725
10.8511	5.25385
10.922	2.77793
10.9929	1.90894
11.0638	4.44236
11.1348	2.81227
11.2057	0.0876
11.2766	3.082e-13
11.3475	3.08281
11.4184	2.66417
11.4894	0
11.5603	0.11405
11.6312	1.2196
11.7021	0.68822
11.773	0.32597
11.844	1.89292
11.9149	4.1103
11.9858	2.33595
12.0567	2.97372
12.1277	3.8808
12.1986	0.25521
12.2695	3.57306
12.3404	3.75779
12.4113	1.64893
12.4823	2.79393
12.5532	0.40656
12.6241	3.73406
12.695	6.28979
12.766	5.43788
12.8369	5.87904
12.9078	4.34887
12.9787	0.30035
13.0496	3.00315
13.1206	3.20079
13.1915	2.14779
13.2624	5.35275
13.3333	9.55753
13.4043	3.34447
13.4752	1.32641
13.5461	2.87648
13.617	6.2307
13.6879	6.40994
13.7589	6.66379
13.8298	2.76418
13.9007	1.13195
13.9716	0
14.0426	0.87402
14.1135	2.82961
14.1844	1.29109
14.2553	0.48472
14.3262	0
14.3972	0
14.4681	0.52537
14.539	1.9475
14.6099	0
14.6809	0
14.7518	0
14.8227	0
14.8936	0
14.9645	0
15.0355	0

## Sheet: Fig 4D-right panel
Fig 4D -right panel	Number	Channel	Region	Tail Offset Cnts	Amplitude 1 kCnts	Amplitude 2 kCnts	Lifetime (τ) 1 ns	Lifetime (τ) 2 ns	IRF Background Cnts	IRF Shift ns	Intensity 1 kCnts	Intensity 2 kCnts	Sum Amplitudes kCnts	Sum Intensity kCnts	Mean τ, Intensity Weighted ns	Mean τ, Amplitude Weighted ns	χ²
	1	HyD 4_1	Overall Decay	35.0004	6.2587	9.95443	0.381028	2.54406	0	0	24.5926	259.174	16.2131	283.767	2.3566	1.70907	1.36237
	2	HyD 4_2	Overall Decay	7.52921	4.1919	4.77326	1.04266	3.21365	0	0	45.0731	157.909	8.96516	202.983	2.73157	2.19854	0.875571
Intensiy profile
Distance (microns)	Gray value GFP	Gray value mCherry
0	0	0
0.0524	0	0
0.1049	0	0
0.1573	0	0
0.2098	0	0
0.2622	0	0
0.3147	0	0
0.3671	0	0
0.4196	0	0
0.472	0	0
0.5245	0.1191	0
0.5769	0.6176	0
0.6294	1.605	0
0.6818	0.9685	0
0.7343	0.0549	0
0.7867	0.5687	0
0.8392	2.6615	0
0.8916	2.6715	0
0.9441	1.6672	0
0.9965	2.2381	0
1.049	1.4079	0
1.1014	4.9116	0
1.1538	0.5163	0
1.2063	4.0252	0
1.2587	1.0061	0
1.3112	2.4769	0
1.3636	0.9435	0
1.4161	0.6933	0
1.4685	0.1035	0
1.521	2.3742	0
1.5734	2.49	0
1.6259	3.2375	0
1.6783	0.4679	0
1.7308	0.3044	0
1.7832	0	0
1.8357	0.0886	0
1.8881	2.0948	0
1.9406	3.3433	0
1.993	0.076	0
2.0455	0.6124	0
2.0979	0.2095	0
2.1503	1.8629	0
2.2028	3.4416	0
2.2552	4.0272	0
2.3077	4.5785	0
2.3601	2.3949	0
2.4126	4.405	0
2.465	4.5509	0
2.5175	2.891	0.6715
2.5699	7.4825	0
2.6224	5.4783	0
2.6748	4.0926	0
2.7273	3.9851	0
2.7797	5.01	0
2.8322	3.452	0
2.8846	1.0073	0
2.9371	3.6435	0.0344
2.9895	2.4966	0
3.042	4.2652	0.5019
3.0944	4.0005	0.1818
3.1469	5.6215	0.1964
3.1993	4.8873	0.9946
3.2517	5.016	0.5882
3.3042	5.5215	0
3.3566	4.7014	0.2257
3.4091	0	0.7003
3.4615	0	2.9368
3.514	2.4358	0.7899
3.5664	1.4437	4.3725
3.6189	3.1817	4.1914
3.6713	4.4856	3.1518
3.7238	3.5354	0
3.7762	3.1462	0.3319
3.8287	4.6631	0.7311
3.8811	4.2875	0.9153
3.9336	3.4344	0.4685
3.986	3.8488	0.7695
4.0385	7.4099	2.107
4.0909	2.8214	2.2922
4.1434	1.7701	1.1887
4.1958	1.3464	2.2497
4.2483	2.8278	3.5515
4.3007	8.9299	0.1438
4.3531	2.3389	0.006
4.4056	2.6134	3.5385
4.458	2.6596	3.0419
4.5105	2.3947	1.6385
4.5629	2.1647	0.7145
4.6154	3.3706	3.432
4.6678	3.4721	1.923
4.7203	5.0713	0.2328
4.7727	2.7552	0.3269
4.8252	1.2533	1.6881
4.8776	3.3525	1.1516
4.9301	0.1808	0.2365
4.9825	0	1.0851
5.035	1.0288	1.3564
5.0874	3.5997	0
5.1399	4.2516	0
5.1923	3.2674	0
5.2448	2.276	0.0544
5.2972	2.035	0.0646
5.3497	1.0962	0
5.4021	3.5451	0.0767
5.4545	0.2192	0.4052
5.507	1.4361	3.6932
5.5594	3.7387	1.8618
5.6119	1.5482	2.4041
5.6643	1.3004	1.5358
5.7168	2.1309	2.3197
5.7692	6.0129	0.5747
5.8217	2.402	2.0458
5.8741	0.8399	1.0543
5.9266	0.1979	0.5341
5.979	0.3943	1.0655
6.0315	3.7328	0.1158
6.0839	3.7687	0.0062
6.1364	0.754	2.6621
6.1888	0	1.8406
6.2413	1.7715	0
6.2937	0.9874	0.8218
6.3462	0	2.506
6.3986	0	0.9884
6.451	1.0601	1.427
6.5035	1.5304	0.0329
6.5559	0	0.7652
6.6084	0	3.0647
6.6608	0	0.4044
6.7133	1.5594	0.6721
6.7657	2.3768	1.7417
6.8182	0.1955	0.9623
6.8706	0	0.9157
6.9231	0	4.446e-12
6.9755	0	1.1825
7.028	0	1.7256
7.0804	0	0.9863
7.1329	0	3.1489
7.1853	2.0252	3.5704
7.2378	0.3139	3.7317
7.2902	0	0.6498
7.3427	0	0.1309
7.3951	0	0
7.4476	0	1.0988
7.5	0	1.7041
7.5524	0	1.1408
7.6049	0	0.6285
7.6573	2.2682	0
7.7098	3.3905	0
7.7622	0.3368	0.0227
7.8147	2.4446	2.4021
7.8671	0.0379	1.7661
7.9196	1.6152	2.5587
7.972	0	0.9091
8.0245	0.544	0.9837
8.0769	2.8209	1.6944
8.1294	3.7284	1.2366
8.1818	1.0016	1.4274
8.2343	0.1195	0
8.2867	3.4302	1.2822
8.3392	0.4117	5.911
8.3916	0.1762	2.1734
8.4441	0.1816	4.8731
8.4965	0.3157	3.5363
8.549	2.6263	1.0961
8.6014	1.5542	0.5723
8.6538	4.2563	1.6302
8.7063	3.6661	0.3907
8.7587	4.8355	0.6605
8.8112	2.5725	0.0261
8.8636	2.664	0
8.9161	4.2295	0.5365
8.9685	0.7302	2.1301
9.021	1.1243	3.4693
9.0734	1.0624	3.0611
9.1259	0.6262	2.8644
9.1783	1.0432	3.4
9.2308	2.997e-12	1.2371
9.2832	2.027	0.3152
9.3357	0	2.5697
9.3881	1.0871	0.8155
9.4406	2.7966	0.2689
9.493	1.1857	3.297
9.5455	1.668	1.0223
9.5979	5.571	1.0951
9.6504	1.4084	0.4981
9.7028	1.4625	0.2888
9.7552	1.2936	1.0628
9.8077	9.582e-13	0.001
9.8601	2.0026	1.651
9.9126	2.2694	1.9046
9.965	2.7275	1.8868
10.0175	2.3844	2.3488
10.0699	0.1906	5.2238
10.1224	3.7747	1.9796
10.1748	1.098	0.5984
10.2273	0	0
10.2797	3.1691	1.311
10.3322	6.143	0.5232
10.3846	6.276e-12	3.0776
10.4371	4.3823	5.8808
10.4895	2.2155	2.4379
10.542	1.6165	0.3735
10.5944	1.2213	0.9326
10.6469	0.2624	1.0299
10.6993	0.0926	2.3624
10.7517	0	4.7665
10.8042	2.1681	2.9213
10.8566	1.6027	2.4249
10.9091	0	0.0576
10.9615	1.66e-12	0.9827
11.014	1.7589	0.3744
11.0664	4.3158	2.0802
11.1189	2.7194	0.7784
11.1713	0.2342	0.5342
11.2238	3.981	0.5935
11.2762	0.3981	0
11.3287	0.4034	0.0491
11.3811	0.8188	0.3183
11.4336	0.0161	1.2925
11.486	0.4354	0.4202
11.5385	3.8194	1.072e-11
11.5909	2.0847	1.7601
11.6434	4.036	1.8526
11.6958	2.5069	5.0209
11.7483	0	3.6144
11.8007	0.5057	5.0835
11.8531	4.2221	6.178
11.9056	1.5163	8.0167
11.958	3.4474	19.0987
12.0105	4.551	27.1478
12.0629	6.4251	28.7852
12.1154	3.3953	37.9276
12.1678	8.4449	33.6243
12.2203	12.6165	44.6021
12.2727	11.7318	41.3543
12.3252	12.1473	36.5591
12.3776	10.4359	54.4087
12.4301	8.0105	51.5818
12.4825	16.1503	59.5352
12.535	15.683	61.7101
12.5874	14.2729	57.7623
12.6399	15.9955	63.2011
12.6923	20.6458	66.5375
12.7448	18.1891	58.959
12.7972	17.4951	64.4459
12.8497	18.2884	49.3694
12.9021	19.8636	59.5788
12.9545	17.4687	47.6193
13.007	17.2275	47.3405
13.0594	13.3901	39.9883
13.1119	13.4615	30.3425
13.1643	10.663	27.1384
13.2168	13.2973	27.4449
13.2692	9.2362	23.1609
13.3217	7.3239	19.386
13.3741	5.7497	15.2735
13.4266	5.2759	9.4805
13.479	2.3613	8.6532
13.5315	4.4628	3.7492
13.5839	0.9888	4.2524
13.6364	4.2004	1.0807
13.6888	6.3228	1.5003
13.7413	4.2896	2.0082
13.7937	5.8771	0
13.8462	2.279e-11	1.606e-11
13.8986	0.238	0.1677
13.951	2.5701	0
14.0035	1.8095	0
14.0559	0	0
14.1084	0.9378	0
14.1608	2.2129	0
14.2133	3.8422	0
14.2657	4.2719	0.0618
14.3182	1.9954	0
14.3706	0.6189	0
14.4231	0	0
14.4755	0.9017	0
14.528	1.6891	0
14.5804	0	0
14.6329	0	0
14.6853	0.2123	0
14.7378	0.0194	0
14.7902	0	0
14.8427	0.7825	0
14.8951	0	0
14.9476	0	0
15	2.215e-12	0

## Sheet: Fig 4E-percentage
Plant	RH	GFP + mCherry	GFP only	mCherry only
Plant 1	RH 1	1	0	1
Plant 1	RH 2	1	0	0
Plant 1	RH 3	1	0	0
Plant 1	RH 4	1	0	0
Plant 1	RH 5	2	0	0
Plant 2	RH 6	3	0	0
Plant 3	RH 7	2	0	0
Plant 3	RH 8	0	0	1
Plant 3	RH 9	2	0	0
Plant 3	RH 10	1	0	0
Plant 4	RH 11	4	0	0
Plant 4	RH 12	2	0	0
Plant 5	RH 13	1	0	0
Plant 5	RH 14	1	0	0
Plant 6	RH 15	1	0	0
Plant 6	RH 16	2	0	0
Plant 7	RH 17	1	0	0
Plant 7	RH 18	1	0	0
Plant 7	RH 19	3	0	0
Plant 8	RH 20	0	0	1
Plant 9	RH 21	1	0	0
Plant 9	RH 22	2	0	0
Plant 9	RH 23	2	0	1
Plant 10	RH 24		0	1
Plant 10	RH 25	1	0	0
Plant 11	RH 26	1	0	0
Plant 11	RH 27-28	5	0	3
Plant 11	RH 29-33	7	0	2
Plant 12	RH 34	1	0	0
Plant 12	RH 35-36	3	0	0
Plant 12	RH 37	1	0	0
Plant 12	RH 38-39	2	0	0
Plant 12	RH 40	1	0	0
Plant 13	RH 41	1	0	3
Plant 13	RH 42-43	2	0	0
Plant 14	RH 44	2	0	2
Plant 15	RH 45	1	0	0
Plant 15	RH 46	1	0	0
Plant 16	RH 47	2	0	0
Plant 16	RH 48	1	0	0
Plant 17	RH 49-.50	4	0	0
Plant 18	RH 51	2	0	0
Plant 18	RH 51-52	2	0	0
		75	0	15	number
		83.3333	0	16.6667	percentage
