# Supplementary material for: RPG acts as a central determinant for infectosome formation and cellular polarization during intracellular rhizobial infections
Source: eLife journal article supplement (doi:10.7554/elife.80741), 2023-02-22
Supplement: fig5-data1 [file Figure 5 - source data 1.xlsx]

## Sheet: panel 5A_FLIM fit
Figure 5A IC WT	Number	Channel	Region	Tail Offset Cnts	Amplitude 1 kCnts	Amplitude 2 kCnts	Amplitude 3 kCnts	Lifetime (τ) 1 ns	Lifetime (τ) 2 ns	Lifetime (τ) 3 ns	IRF Background Cnts	IRF Shift ns	Intensity 1 kCnts	Intensity 2 kCnts	Intensity 3 kCnts	Sum Amplitudes kCnts	Sum Intensity kCnts	Mean τ, Intensity Weighted ns	Mean τ, Amplitude Weighted ns	χ²
	1	HyD 4_1	Overall Decay	30749.3	284.612	88.0092	13.5769	0.284908	0.957155	3.8035	0	0	836.222	868.706	509.39	386.198	2214.32	1.35807	0.561801	4.52195
	2	HyD 4_1	ROI 1	42.7518	0.37937	0.75506		0.419719	3.04548		0	0	1.64205	23.2564		1.13443	24.8985	2.87231	2.16739	0.869663
	3	HyD 4_2	Overall Decay	31807.1	199.46	235.837		0.443922	1.55337		0	0	913.119	3776.45		435.297	4689.57	1.33734	1.045	2.55572
	4	HyD 4_2	ROI 1
Figure 5A IC rpg-1	Number	Channel	Region	Tail Offset Cnts	Amplitude 1 kCnts	Amplitude 2 kCnts	Amplitude 3 kCnts	Lifetime (τ) 1 ns	Lifetime (τ) 2 ns	Lifetime (τ) 3 ns	IRF Background Cnts	IRF Shift ns	Intensity 1 kCnts	Intensity 2 kCnts	Intensity 3 kCnts	Sum Amplitudes kCnts	Sum Intensity kCnts	Mean τ, Intensity Weighted ns	Mean τ, Amplitude Weighted ns	χ²
	1	HyD 4_1	Overall Decay	0	447.03	172.426	52.6287	0.264541	0.837772	3.07427	0	0	1219.53	1489.68	1635.11	672.085	4344.33	1.51863	0.631626	16.2396
	2	HyD 4_1	ROI 1	3.49154	0.744071	2.33365		0.428313	2.99864		0	0	3.28655	70.7682		3.07772	74.0547	2.88457	2.37723	0.990322
	3	HyD 4_2	Overall Decay	736.662	484.515	557.962		0.617249	1.58556		0	0	3084.12	9119.67		1042.48	12203.8	1.34085	1.13552	5.04894
	4	HyD 4_2	ROI 1
Figure 5A IT WT	Number	Channel	Region	Tail Offset Cnts	Amplitude 1 kCnts	Amplitude 2 kCnts	Amplitude 3 kCnts	Lifetime (τ) 1 ns	Lifetime (τ) 2 ns	Lifetime (τ) 3 ns	IRF Background Cnts	IRF Shift ns	Intensity 1 kCnts	Intensity 2 kCnts	Intensity 3 kCnts	Sum Amplitudes kCnts	Sum Intensity kCnts	Mean τ, Intensity Weighted ns	Mean τ, Amplitude Weighted ns	χ²
	1	HyD 4_1	Overall Decay	22798.1	192.179	55.9502	26.6045	0.2898	1.1941	3.99416	0	0	574.341	688.939	1037.76	274.734	2301.04	2.2312	0.832682	3.94802
	2	HyD 4_1	ROI 1	131.724	0.99583	5.79688		0.983012	3.15704		0	0	10.095	185.248		6.79271	195.343	3.04469	2.83832	1.05145
	3	HyD 4_2	Overall Decay	24108.8	374.749	577.944		0.66858	1.62763		0	0	2583.79	9695.72		952.693	12279.5	1.42583	1.25038	2.56945
	4	HyD 4_2	ROI 1
Figure 5A IT rpg-1	Number	Channel	Region	Tail Offset Cnts	Amplitude 1 kCnts	Amplitude 2 kCnts	Amplitude 3 kCnts	Lifetime (τ) 1 ns	Lifetime (τ) 2 ns	Lifetime (τ) 3 ns	IRF Background Cnts	IRF Shift ns	Intensity 1 kCnts	Intensity 2 kCnts	Intensity 3 kCnts	Sum Amplitudes kCnts	Sum Intensity kCnts	Mean τ, Intensity Weighted ns	Mean τ, Amplitude Weighted ns	χ²
	1	HyD 4_1	Overall Decay	0	256.884	95.8244	17.2998	0.251245	0.832215	3.35383	0	0	665.578	822.386	581.744	370.008	2069.71	1.35415	0.546766	43.8252
	2	HyD 4_1	ROI 1	0	0.263187	0.298392		0.419845	3.09645		0	0	1.13951	9.30597		0.561579	10.4455	2.80445	1.84204	0.626317
	3	HyD 4_2	Overall Decay	740.954	432.321	622.724		0.617207	1.57556		0	0	2751.7	10114.6		1055.05	12866.3	1.3706	1.18286	2.3646
	4	HyD 4_2	ROI 1
Figure 5A CC WT	Number	Channel	Region	Tail Offset Cnts	Amplitude 1 kCnts	Amplitude 2 kCnts	Lifetime (τ) 1 ns	Lifetime (τ) 2 ns	IRF Background Cnts	IRF Shift ns	Intensity 1 kCnts	Intensity 2 kCnts	Sum Amplitudes kCnts	Sum Intensity kCnts	Mean τ, Intensity Weighted ns	Mean τ, Amplitude Weighted ns	χ²
	1	HyD 4_1	Overall Decay	1167.88	216.222	225.681	0.347453	2.95263	0	0	774.746	6754.68	441.902	7529.43	2.68457	1.67792	6.79382
	2	HyD 4_1	ROI 1	41.772	22.0726		2.9533		0	0	661.146		22.0726	661.146	2.9533	2.9533	2.68321
	3	HyD 4_2	Overall Decay	535.745	480.231	897.823	0.732455	1.53732	0	0	3627.39	14229.8	1378.05	17857.2	1.37383	1.25684	1.55669
	4	HyD 4_2	ROI 1
Figure 5A CC rpg-1 (upper panel)	Number	Channel	Region	Tail Offset Cnts	Amplitude 1 kCnts	Amplitude 2 kCnts	Amplitude 3 kCnts	Lifetime (τ) 1 ns	Lifetime (τ) 2 ns	Lifetime (τ) 3 ns	IRF Background Cnts	IRF Shift ns	Intensity 1 kCnts	Intensity 2 kCnts	Intensity 3 kCnts	Sum Amplitudes kCnts	Sum Intensity kCnts	Mean τ, Intensity Weighted ns	Mean τ, Amplitude Weighted ns	χ²
	1	HyD 4_1	Overall Decay	16.8741	150.739	50	41.9986	0.283838	0.972322	3.22494	0	0	441.225	501.352	1363.19	242.737	2305.77	2.17235	0.934527	2.71441
	2	HyD 4_1	ROI 1	1.53928	1.02414	1.45239		0.447646	3.08412		0	0	4.72779	45.2862		2.47654	50.014	2.8349	1.99384	0.993883
	3	HyD 4_2	Overall Decay	1094.89	682.354	888.315		0.657906	1.59506		0	0	4629.54	14606.5		1570.67	19236.1	1.36951	1.18793	4.03056
	4	HyD 4_2	ROI 1
	Number	Channel	Region	Tail Offset Cnts	Amplitude 1 kCnts	Amplitude 2 kCnts	Lifetime (τ) 1 ns	Lifetime (τ) 2 ns	IRF Background Cnts	IRF Shift ns	Intensity 1 kCnts	Intensity 2 kCnts	Sum Amplitudes kCnts	Sum Intensity kCnts	Mean τ, Intensity Weighted ns	Mean τ, Amplitude Weighted ns	χ²
Figure 5A CC rpg-1 (lower panel)	1	HyD 4_1	Overall Decay	226.754	52.0334	36.6739	0.343758	2.9373	0	0	184.459	1094.11	88.7073	1278.56	2.56313	1.416	4.23568
	2	HyD 4_1	ROI 1	11.1493	2.89582		2.99306		0	0	87.7734		2.89582	87.7734	2.99306	2.99306	0.952962
	3	HyD 4_2	Overall Decay	329.631	278.384	545.689	0.655118	1.47134	0	0	1880.74	8277.8	824.073	10158.5	1.32023	1.19561	1.75696
	4	HyD 4_2	ROI 1

## Sheet: panel 5B_FLIM fit
Figure 5B WT	Number	Channel	Region	Tail Offset Cnts	Amplitude 1 kCnts	Amplitude 2 kCnts	Amplitude 3 kCnts	Lifetime (τ) 1 ns	Lifetime (τ) 2 ns	Lifetime (τ) 3 ns	IRF Background Cnts	IRF Shift ns	Intensity 1 kCnts	Intensity 2 kCnts	Intensity 3 kCnts	Sum Amplitudes kCnts	Sum Intensity kCnts	Mean τ, Intensity Weighted ns	Mean τ, Amplitude Weighted ns	χ²
	1	HyD 4_1	Overall Decay	0	550.158	196.407	59.63	0.258323	0.822315	3.0406	0	0	1465.6	1665.56	1833.93	806.195	4965.09	1.47519	0.601514	30.7872
	3	HyD 4_2	Overall Decay	33.3844	156.326	151.795	44.3222	0.348713	1.25183	3.16897	0	0	562.165	1959.59	1447.84	352.443	3969.59	1.82317	1.09234	1.24902
Figure 5B rpg-1	Number	Channel	Region	Tail Offset Cnts	Amplitude 1 kCnts	Amplitude 2 kCnts	Amplitude 3 kCnts	Lifetime (τ) 1 ns	Lifetime (τ) 2 ns	Lifetime (τ) 3 ns	IRF Background Cnts	IRF Shift ns	Intensity 1 kCnts	Intensity 2 kCnts	Intensity 3 kCnts	Sum Amplitudes kCnts	Sum Intensity kCnts	Mean τ, Intensity Weighted ns	Mean τ, Amplitude Weighted ns	χ²
	1	HyD 4_1	Overall Decay	293.296	1597.36	484.133	69.081	0.236	0.797	2.925	0	0	3895.74	3979.61	2048.72	2150.58	9924.07	1.016	0.449	35.005
	3	HyD 4_2	Overall Decay	74.681	333.974	283.312	33.13	0.359	1.26	2.81	0	0	1236.4	3680.81	960.046	650.416	5877.26	1.324	0.876	2.744

## Sheet: panel 5B_values
WT
	IT		PM		background		IT/PM
	PI(4,5)P2	PI4P	PI(4,5)P2	PI4P	PI(4,5)P2	PI4P	PI(4,5)P2	PI4P
Plant	Intensity (Mean Gray Value)	Intensity (Mean Gray Value)	Intensity (Mean Gray Value)	Intensity (Mean Gray Value)	Intensity (Mean Gray Value)	Intensity (Mean Gray Value)	((Int PI(4,5)P2 IT-background PI(4,5)P2)/(Int PI(4,5)P2 PM -background PI(4,5)P2))	((Int PI4P IT -background PI4P)/(Int PI4P PM-background PI4P))
1	225.399	11.148	21.677	38.785	0	0	10.3981	0.287431
1	120.824	14	37.332	53.566	0	0	3.23647	0.26136
2	78.88	28.261	5.749	28.262	0	0	13.7206	0.999965
2	30.591	32.789	21.682	108.01	0	0	1.41089	0.303574
3	0.108	30.916	3.819	41.017	0	0	0.0282797	0.753736
3	2.953	52.084	10.999	66.945	0	0	0.268479	0.778012
4	69.655	19.352	11.281	35.099	0	0	6.17454	0.551355
5	150.566	77.727	11.39	85.404	0	0	13.2191	0.91011
6	80.338	29.19	9.786	39.116	0	0	8.20948	0.746242
7	140.789	22.067	7.165	15.437	0	0	19.6495	1.42949
8	117.893	19.233	6.389	32.337	0	0	18.4525	0.594768
9	143.054	8.654	21.089	16.702	0.055	0.012	6.79847	0.517795
9	164.089	21.689	32.909	31.678	0	0.007	4.98614	0.684601
9	123.822	4.638	10.838	22.864	0	0	11.4248	0.202852
10	154.693	12.196	9.68	17.075	0.173	0.068	16.2533	0.713118
11	73.643	19.335	14.544	20.454	0.002	0.013	5.06402	0.945257
12	77.795	11.832	9.464	14.856	0.01	0.00249	8.22773	0.796412
13	67.785	2.398	6.04	11.853	0	0	11.2227	0.202312
rpg-1
	IT		PM		background		IT/PM
	PI(4,5)P2	PI4P	PI(4,5)P2	PI4P	PI(4,5)P2	PI4P	PI(4,5)P2	PI4P
Plant	Intensity (Mean Gray Value)	Intensity (Mean Gray Value)	Intensity (Mean Gray Value)	Intensity (Mean Gray Value)	Intensity (Mean Gray Value)	Intensity (Mean Gray Value)	((Int PI(4,5)P2 IT-background PI(4,5)P2)/(Int PI(4,5)P2 PM -background PI(4,5)P2))	((Int PI4P IT -background PI4P)/(Int PI4P PM-background PI4P))
1	24.267	86.697	19.83	79.555	0	0	1.22375	1.08977
1	47.153	109.626	30.671	138.976	0	0	1.53738	0.788812
1	50.249	105.876	62.306	154.159	0	0	0.806487	0.686797
1	45.89	85.468	28.018	102.006	0	0	1.63788	0.837872
2	11.226	38.197	18.356	60.212	0	0	0.611571	0.634375
2	9.458	46.67	16.765	74.804	0	0	0.564152	0.623897
2	12.851	48.37	18.973	57.318	0	0	0.677331	0.843888
2	7.736	34.754	8.764	42.592	0	0	0.882702	0.815975
3	5.555	34.019	6.926	33.966	0	0	0.80205	1.00156
3	0.816	13.167	6.834	35.157	0	0	0.119403	0.37452
3	4.114	41.184	3.328	39.283	0	0	1.23618	1.04839
4	25.632	13.868	7.353	41.068	0	0	3.48592	0.337684
5	9.866	75.684	5.631	46.693	0	0	1.75209	1.62089
5	2.979	44.008	2.895	31.474	0	0	1.02902	1.39823
5	2.692	51.75	4.788	47.754	0	0	0.562239	1.08368
6	118.106	48.539	19.616	45.487	0	0	6.0209	1.0671
7	49.114	19.806	4.613	23.458	0	0	10.6469	0.844318
7	89.352	9.752	4.993	15.345	0	0	17.8955	0.635516
8	36.814	22.302	24.775	38.557	0.017	0.003	1.48627	0.578384
8	32.403	61.754	33.876	66.659	0.085	0.028	0.956409	0.926386
8	16.148	32.072	11.233	29.313	0.002	0	1.43763	1.09412
8	17.403	48.125	14.434	38.535	0.01	0.477	1.20584	1.25198
9	25.786	61.315	15.027	29.118	0	0.008	1.71598	2.10605
9	40.005	45.695	19.29	27.783	0.007	0.015	2.07426	1.64506
10	45.545	29.19	26.179	25.773	0.168	0.058	1.74453	1.13288
10	12.502	58.7	20.457	40.797	0.008	0.006	0.610983	1.4389
10	11.217	37.082	14.3	32.261	0	0.003	0.784406	1.14945
10	8.063	26.733	8.556	25.012	0.006	0.027	0.942339	1.06888
10	5.444	19.76	9.499	24.308	0.009	0.014	0.572708	0.812793
10	5.269	17.104	5.876	20.38	0.014	0.026	0.896452	0.839049
11	50.494	30.31	23.542	40.713	0.658	0.305	2.17777	0.742551
11	146.694	37.851	19.478	67.684	0.307	0.165	7.63586	0.558154
11	44.781	42.003	14.505	43.703	0.197	0.11	3.11602	0.961003
12	0.129	11.308	4.68	10.702	0	0	0.0275641	1.05662
13	20.426	41.672	7.812	27.276	0.031	0.009	2.62113	1.52796
13	18.026	43.2	7.916	27.684	0.039	0.007	2.28348	1.56061
14	11.9	19.639	11.872	15.387	0.744	0.002	1.00252	1.27637

## Sheet: panel 5B_Mann-Whitney
Mann-whitney test
IT/PM PI(4,5)P2		IT/PM PI4P
Column D	rpg-1 IT/PM PI(4,5)P2	Column E	rpg-1 IT/PM PI4P
vs.	vs,	vs.	vs,
Column A	WT IT/PM PI(4,5)P2	Column B	WT IT/PM PI4P
Mann Whitney test		Mann Whitney test
P value	<0,0001	P value	0.0004
Exact or approximate P value?	Exact	Exact or approximate P value?	Exact
P value summary	****	P value summary	***
Significantly different (P < 0.05)?	Yes	Significantly different (P < 0.05)?	Yes
One- or two-tailed P value?	Two-tailed	One- or two-tailed P value?	Two-tailed
Sum of ranks in column A,D	719 , 821	Sum of ranks in column B,E	313 , 1227
Mann-Whitney U	118	Mann-Whitney U	142
Difference between medians		Difference between medians
Median of column A	8,219, n=18	Median of column B	0,6989, n=18
Median of column D	1,224, n=37	Median of column E	1,002, n=37
Difference: Actual	-6.995	Difference: Actual	0.3027
Difference: Hodges-Lehmann	-6.207	Difference: Hodges-Lehmann	0.337
