# Supplementary material for: RPG acts as a central determinant for infectosome formation and cellular polarization during intracellular rhizobial infections
Source: eLife journal article supplement (doi:10.7554/elife.80741), 2023-02-22
Supplement: fig5-figsupp1-data1 [file elife-80741-fig5-figsupp1-data1-v2.zip]

## Sheet: FLIM fit
Fig 5 - fig suppl 1	Number	Channel	Region	Tail Offset Cnts	Amplitude 1 kCnts	Amplitude 2 kCnts	Lifetime (τ) 1 ns	Lifetime (τ) 2 ns	IRF Background Cnts	IRF Shift ns	Intensity 1 kCnts	Intensity 2 kCnts	Sum Amplitudes kCnts	Sum Intensity kCnts	Mean τ, Intensity Weighted ns	Mean τ, Amplitude Weighted ns	χ²
	1	HyD 4_1	Overall Decay	76108.6	331.554	110.022	0.298578	2.47436	0	0	1020.88	2785.66	441.576	3806.54	1.89083	0.840693	16.9859
	2	HyD 4_1	ROI 1	219.296	7.14248		2.98079		0	0	215.668		7.14248	215.668	2.98079	2.98079	1.31911
	3	HyD 4_2	Overall Decay	72984.4	310.962	452.532	0.661338	1.6905	0	0	2120.78	7883.39	763.494	10004.2	1.47233	1.27133	1.9242
	4	HyD 4_2	ROI 1
