# Supplementary material for: RPG acts as a central determinant for infectosome formation and cellular polarization during intracellular rhizobial infections
Source: eLife journal article supplement (doi:10.7554/elife.80741), 2023-02-22
Supplement: fig5-figsupp2-data1 [file elife-80741-fig5-figsupp2-data1-v2.zip]

## Sheet: Fig 5 Suppl 2_panel A_FLIM fit
Fig 5 - fig suppl 2A WT (as Fig 5-fig suppl 1 and Fig 5-fig suppl 3A WT)	Number	Channel	Region	Tail Offset Cnts	Amplitude 1 kCnts	Amplitude 2 kCnts	Lifetime (τ) 1 ns	Lifetime (τ) 2 ns	IRF Background Cnts	IRF Shift ns	Intensity 1 kCnts	Intensity 2 kCnts	Sum Amplitudes kCnts	Sum Intensity kCnts	Mean τ, Intensity Weighted ns	Mean τ, Amplitude Weighted ns	χ²
	1	HyD 4_1	Overall Decay	76108.6	331.554	110.022	0.298578	2.47436	0	0	1020.88	2785.66	441.576	3806.54	1.89083	0.840693	16.9859
	2	HyD 4_1	ROI 1	219.296	7.14248		2.98079		0	0	215.668		7.14248	215.668	2.98079	2.98079	1.31911
	3	HyD 4_2	Overall Decay	72984.4	310.962	452.532	0.661338	1.6905	0	0	2120.78	7883.39	763.494	10004.2	1.47233	1.27133	1.9242
	4	HyD 4_2	ROI 1
Fig 5 - fig suppl 2A rpg-1 (as Fig 5-fig suppl 3A)	Number	Channel	Region	Tail Offset Cnts	Amplitude 1 kCnts	Amplitude 2 kCnts	Lifetime (τ) 1 ns	Lifetime (τ) 2 ns	IRF Background Cnts	IRF Shift ns	Intensity 1 kCnts	Intensity 2 kCnts	Sum Amplitudes kCnts	Sum Intensity kCnts	Mean τ, Intensity Weighted ns	Mean τ, Amplitude Weighted ns	χ²
	1	HyD 4_1	Overall Decay	22310.5	47.8923	30.6336	0.264975	2.79832	0	0	130.868	871.559	78.5259	1002.43	2.46759	1.25325	4.95547
	2	HyD 4_1	ROI 1	114.646	3.9684		2.89923		0	0	116.773		3.9684	116.773	2.89923	2.89923	1.24507
	3	HyD 4_2	Overall Decay	21967.7	131.912	204.283	0.690289	1.59677	0	0	939.027	3362.45	336.195	4301.48	1.39888	1.24109	1.16047
	4	HyD 4_2	ROI 1

## Sheet: Fig 5 Suppl 2_panel B_FLIM fit
Fig 5 - fig suppl 2B	Number	Channel	Region	Tail Offset Cnts	Amplitude 1 kCnts	Amplitude 2 kCnts	Lifetime (τ) 1 ns	Lifetime (τ) 2 ns	IRF Background Cnts	IRF Shift ns	Intensity 1 kCnts	Intensity 2 kCnts	Sum Amplitudes kCnts	Sum Intensity kCnts	Mean τ, Intensity Weighted ns	Mean τ, Amplitude Weighted ns	χ²
	1	HyD 4_1	Overall Decay	636.192	117.106	136.815	0.361766	3.0148	0	0	436.887	4174.76	253.92	4611.65	2.76346	1.79124	5.98579
	3	HyD 4_1	ROI 1	11.2616	8.9785		3.01851		0	0	275.055		8.9785	275.055	3.01851	3.01851	1.53434
	4	HyD 4_2	Overall Decay	336.307	360.868	778.507	0.739048	1.52088	0	0	2750.33	12206.6	1139.37	14957	1.37711	1.27325	1.3877
	5	HyD 4_2	ROI 1
Fig 5 - fig suppl 2B close up	Number	Channel	Region	Tail Offset Cnts	Amplitude 1 kCnts	Amplitude 2 kCnts	Lifetime (τ) 1 ns	Lifetime (τ) 2 ns	IRF Background Cnts	IRF Shift ns	Intensity 1 kCnts	Intensity 2 kCnts	Sum Amplitudes kCnts	Sum Intensity kCnts	Mean τ, Intensity Weighted ns	Mean τ, Amplitude Weighted ns	χ²
	1	HyD 4_1	Overall Decay	846.814	121.989	253.579	0.388728	3.04339	0	0	489.026	7800.51	375.568	8289.54	2.88679	2.18112	3.81803
	2	HyD 4_1	ROI 1	57.8799	24.0866		3.00881		0	0	735.675		24.0866	735.675	3.00881	3.00881	2.26543
	3	HyD 4_2	Overall Decay	526.07	538.317	1143.62	0.742562	1.52587	0	0	4122.25	17990.8	1681.93	22113	1.37985	1.27517	1.79871
	4	HyD 4_2	ROI 1
