# Supplementary material for: RPG acts as a central determinant for infectosome formation and cellular polarization during intracellular rhizobial infections
Source: eLife journal article supplement (doi:10.7554/elife.80741), 2023-02-22
Supplement: fig5-figsupp3-data1 [file elife-80741-fig5-figsupp3-data1-v2.zip]

## Sheet: Fig 5 Suppl 3_panel A FLIM fit
Fig 5 - fig suppl 3A WT (as Fig 5-fig suppl 1 and Fig 5-fig suppl 2A WT)	Number	Channel	Region	Tail Offset Cnts	Amplitude 1 kCnts	Amplitude 2 kCnts	Lifetime (τ) 1 ns	Lifetime (τ) 2 ns	IRF Background Cnts	IRF Shift ns	Intensity 1 kCnts	Intensity 2 kCnts	Sum Amplitudes kCnts	Sum Intensity kCnts	Mean τ, Intensity Weighted ns	Mean τ, Amplitude Weighted ns	χ²
	1	HyD 4_1	Overall Decay	76108.6	331.554	110.022	0.298578	2.47436	0	0	1020.88	2785.66	441.576	3806.54	1.89083	0.840693	16.9859
	2	HyD 4_1	ROI 1	219.296	7.14248		2.98079		0	0	215.668		7.14248	215.668	2.98079	2.98079	1.31911
	3	HyD 4_2	Overall Decay	72984.4	310.962	452.532	0.661338	1.6905	0	0	2120.78	7883.39	763.494	10004.2	1.47233	1.27133	1.9242
	4	HyD 4_2	ROI 1
Fig 5 - fig suppl 3A rpg-1 (as Fig 5-fig suppl 2A rpg-1)	Number	Channel	Region	Tail Offset Cnts	Amplitude 1 kCnts	Amplitude 2 kCnts	Lifetime (τ) 1 ns	Lifetime (τ) 2 ns	IRF Background Cnts	IRF Shift ns	Intensity 1 kCnts	Intensity 2 kCnts	Sum Amplitudes kCnts	Sum Intensity kCnts	Mean τ, Intensity Weighted ns	Mean τ, Amplitude Weighted ns	χ²
	1	HyD 4_1	Overall Decay	22310.5	47.8923	30.6336	0.264975	2.79832	0	0	130.868	871.559	78.5259	1002.43	2.46759	1.25325	4.95547
	2	HyD 4_1	ROI 1	114.646	3.9684		2.89923		0	0	116.773		3.9684	116.773	2.89923	2.89923	1.24507
	3	HyD 4_2	Overall Decay	21967.7	131.912	204.283	0.690289	1.59677	0	0	939.027	3362.45	336.195	4301.48	1.39888	1.24109	1.16047
	4	HyD 4_2	ROI 1

## Sheet: Fig 5 Suppl 3_panel B FLIM fit
Fig 5 - fig suppl 3B WT (as Figure 5A IC WT)	Number	Channel	Region	Tail Offset Cnts	Amplitude 1 kCnts	Amplitude 2 kCnts	Amplitude 3 kCnts	Lifetime (τ) 1 ns	Lifetime (τ) 2 ns	Lifetime (τ) 3 ns	IRF Background Cnts	IRF Shift ns	Intensity 1 kCnts	Intensity 2 kCnts	Intensity 3 kCnts	Sum Amplitudes kCnts	Sum Intensity kCnts	Mean τ, Intensity Weighted ns	Mean τ, Amplitude Weighted ns	χ²
	1	HyD 4_1	Overall Decay	30749.3	284.612	88.0092	13.5769	0.284908	0.957155	3.8035	0	0	836.222	868.706	509.39	386.198	2214.32	1.35807	0.561801	4.52195
	2	HyD 4_1	ROI 1	42.7518	0.37937	0.75506		0.419719	3.04548		0	0	1.64205	23.2564		1.13443	24.8985	2.87231	2.16739	0.869663
	3	HyD 4_2	Overall Decay	31807.1	199.46	235.837		0.443922	1.55337		0	0	913.119	3776.45		435.297	4689.57	1.33734	1.045	2.55572
	4	HyD 4_2	ROI 1
Fig 5 - fig suppl 3B rpg-1 ((as Figure 5A IC rpg-1)	Number	Channel	Region	Tail Offset Cnts	Amplitude 1 kCnts	Amplitude 2 kCnts	Amplitude 3 kCnts	Lifetime (τ) 1 ns	Lifetime (τ) 2 ns	Lifetime (τ) 3 ns	IRF Background Cnts	IRF Shift ns	Intensity 1 kCnts	Intensity 2 kCnts	Intensity 3 kCnts	Sum Amplitudes kCnts	Sum Intensity kCnts	Mean τ, Intensity Weighted ns	Mean τ, Amplitude Weighted ns	χ²
	1	HyD 4_1	Overall Decay	0	447.03	172.426	52.6287	0.264541	0.837772	3.07427	0	0	1219.53	1489.68	1635.11	672.085	4344.33	1.51863	0.631626	16.2396
	2	HyD 4_1	ROI 1	3.49154	0.744071	2.33365		0.428313	2.99864		0	0	3.28655	70.7682		3.07772	74.0547	2.88457	2.37723	0.990322
	3	HyD 4_2	Overall Decay	736.662	484.515	557.962		0.617249	1.58556		0	0	3084.12	9119.67		1042.48	12203.8	1.34085	1.13552	5.04894
	4	HyD 4_2	ROI 1

## Sheet: Fig 5 Suppl 3_panel C FLIM fit
Fig 5 - fig suppl 3C WT (as Figure 5A IT WT)	Number	Channel	Region	Tail Offset Cnts	Amplitude 1 kCnts	Amplitude 2 kCnts	Amplitude 3 kCnts	Lifetime (τ) 1 ns	Lifetime (τ) 2 ns	Lifetime (τ) 3 ns	IRF Background Cnts	IRF Shift ns	Intensity 1 kCnts	Intensity 2 kCnts	Intensity 3 kCnts	Sum Amplitudes kCnts	Sum Intensity kCnts	Mean τ, Intensity Weighted ns	Mean τ, Amplitude Weighted ns	χ²
	1	HyD 4_1	Overall Decay	22798.1	192.179	55.9502	26.6045	0.2898	1.1941	3.99416	0	0	574.341	688.939	1037.76	274.734	2301.04	2.2312	0.832682	3.94802
	2	HyD 4_1	ROI 1	131.724	0.99583	5.79688		0.983012	3.15704		0	0	10.095	185.248		6.79271	195.343	3.04469	2.83832	1.05145
	3	HyD 4_2	Overall Decay	24108.8	374.749	577.944		0.66858	1.62763		0	0	2583.79	9695.72		952.693	12279.5	1.42583	1.25038	2.56945
	4	HyD 4_2	ROI 1
Fig 5 - fig suppl 3C rpg-1 weak (as Figure 5A IT rpg-1)	Number	Channel	Region	Tail Offset Cnts	Amplitude 1 kCnts	Amplitude 2 kCnts	Amplitude 3 kCnts	Lifetime (τ) 1 ns	Lifetime (τ) 2 ns	Lifetime (τ) 3 ns	IRF Background Cnts	IRF Shift ns	Intensity 1 kCnts	Intensity 2 kCnts	Intensity 3 kCnts	Sum Amplitudes kCnts	Sum Intensity kCnts	Mean τ, Intensity Weighted ns	Mean τ, Amplitude Weighted ns	χ²
	1	HyD 4_1	Overall Decay	0	256.884	95.8244	17.2998	0.251245	0.832215	3.35383	0	0	665.578	822.386	581.744	370.008	2069.71	1.35415	0.546766	43.8252
	2	HyD 4_1	ROI 1	0	0.263187	0.298392		0.419845	3.09645		0	0	1.13951	9.30597		0.561579	10.4455	2.80445	1.84204	0.626317
	3	HyD 4_2	Overall Decay	740.954	432.321	622.724		0.617207	1.57556		0	0	2751.7	10114.6		1055.05	12866.3	1.3706	1.18286	2.3646
	4	HyD 4_2	ROI 1
Fig 5 - fig suppl 3C rpg-1 absent (as Fig 5-fig suppl 5A absent)	Number	Channel	Region	Tail Offset Cnts	Amplitude 1 kCnts	Amplitude 2 kCnts	Amplitude 3 kCnts	Lifetime (τ) 1 ns	Lifetime (τ) 2 ns	Lifetime (τ) 3 ns	IRF Background Cnts	IRF Shift ns	Intensity 1 kCnts	Intensity 2 kCnts	Intensity 3 kCnts	Sum Amplitudes kCnts	Sum Intensity kCnts	Mean τ, Intensity Weighted ns	Mean τ, Amplitude Weighted ns	χ²
	1	HyD 4_1	Overall Decay	21396.7	339.983	97.0198	27.2544	0.261235	1.10334	4.73672	0	0	915.91	1103.89	1226.16	464.257	3245.96	2.23823	0.699953	7.94255
	2	HyD 4_1	ROI 1	86.7148	4.02728	1.81254		0.343026	2.6088		0	0	14.2463	48.3123		5.83982	62.5586	2.09282	1.04627	1.15297
	3	HyD 4_2	Overall Decay	23316.8	118.14	151.345		0.674085	1.63641		0	0	821.248	2552.64		269.485	3373.89	1.40217	1.21454	1.18934
	4	HyD 4_2	ROI 1
Fig 5-figure suppl 3C rpg-1 multiple polar sites (as Fig 5-fig suppl 5A multiple polar sites)	Number	Channel	Region	Tail Offset Cnts	Amplitude 1 kCnts	Amplitude 2 kCnts	Amplitude 3 kCnts	Lifetime (τ) 1 ns	Lifetime (τ) 2 ns	Lifetime (τ) 3 ns	IRF Background Cnts	IRF Shift ns	Intensity 1 kCnts	Intensity 2 kCnts	Intensity 3 kCnts	Sum Amplitudes kCnts	Sum Intensity kCnts	Mean τ, Intensity Weighted ns	Mean τ, Amplitude Weighted ns	χ²
	1	HyD 4_1	Overall Decay	43982	1369.95	335.15	56.2618	0.230834	0.811236	3.31159	0	0	3261.14	2803.82	1870.48	1761.36	7935.44	1.16208	0.439678	13.7287
	2	HyD 4_1	ROI 1	39.8699	0.903925	1.36231		0.381581	3.08394		0	0	3.55699	42.448		2.26624	46.0049	2.875	2.00606	0.922316
	5	HyD 4_2	Overall Decay	44191.1	107.085	116.133		0.405301	1.51218		0	0	447.581	1810.5		223.219	2258.08	1.29278	0.981174	2.44427
	6	HyD 4_2	ROI 1

## Sheet: Fig 5 Suppl 3_panel D FLIM fit
Fig 5 - fig suppl 3D WT (as Figure 5A CC WT)	Number	Channel	Region	Tail Offset Cnts	Amplitude 1 kCnts	Amplitude 2 kCnts	Lifetime (τ) 1 ns	Lifetime (τ) 2 ns	IRF Background Cnts	IRF Shift ns	Intensity 1 kCnts	Intensity 2 kCnts	Sum Amplitudes kCnts	Sum Intensity kCnts	Mean τ, Intensity Weighted ns	Mean τ, Amplitude Weighted ns	χ²
	1	HyD 4_1	Overall Decay	1167.88	216.222	225.681	0.347	2.953	0	0	774.746	6754.68	441.902	7529.43	2.685	1.678	6.794
	2	HyD 4_1	ROI 1	41.772	22.073		2.953		0	0	661.146		22.073	661.146	2.953	2.953	2.683
	3	HyD 4_2	Overall Decay	535.745	480.231	897.823	0.732	1.537	0	0	3627.39	14229.8	1378.05	17857.2	1.374	1.257	1.557
	4	HyD 4_2	ROI 1
Fig 5 - fig suppl 3D rpg-1 (as Figure 5A CC rpg-1 lower panel)	Number	Channel	Region	Tail Offset Cnts	Amplitude 1 kCnts	Amplitude 2 kCnts	Lifetime (τ) 1 ns	Lifetime (τ) 2 ns	IRF Background Cnts	IRF Shift ns	Intensity 1 kCnts	Intensity 2 kCnts	Sum Amplitudes kCnts	Sum Intensity kCnts	Mean τ, Intensity Weighted ns	Mean τ, Amplitude Weighted ns	χ²
	1	HyD 4_1	Overall Decay	226.754	52.033	36.674	0.344	2.937	0	0	184.459	1094.11	88.707	1278.57	2.563	1.416	4.236
	2	HyD 4_1	ROI 1	11.149	2.896		2.993		0	0	87.773		2.896	87.773	2.993	2.993	0.953
	3	HyD 4_2	Overall Decay	329.631	278.384	545.689	0.655	1.471	0	0	1880.73	8277.8	824.073	10158.5	1.32	1.196	1.757
	4	HyD 4_2	ROI 1

## Sheet: Fig 5 Suppl 3_panel E values
	uRH						IC						IT						CC
	WT		rpg-1				WT		rpg-1				WT		rpg-1				WT		rpg-1
	XM	YM	XM	YM			XM	YM	XM	YM			XM	YM	XM	YM			XM	YM	XM	YM
	1.2	1.722	0.76	1.575			1.688	1.715	0.687	1.627			0.798	1.578	0.992	1.719			0.547	1.673	0.456	1.593
	0.527	1.591	1.072	1.511			0.672	1.597	1.008	1.669			0.695	1.624	1.057	1.642			0.55	1.606	0.546	1.599
	0.988	1.553	0.691	1.426			1.015	1.65	0.713	1.625			0.604	1.59	0.804	1.643			0.756	1.65	0.68	1.57
	0.491	1.328	0.708	1.474			1.663	1.69	1.879	1.647			0.637	1.632	1.106	1.49			0.385	1.126	0.655	1.338
	0.446	1.255	0.525	1.395			1.601	1.677	0.857	1.632			1.557	1.772	0.823	1.298					0.501	1.362
	0.528	1.549	0.404	1.149			0.912	1.469	0.902	1.57			0.662	1.655	0.701	1.533					0.887	1.355
	0.537	1.486	0.603	1.525			0.726	1.303	1.66	1.601			0.849	1.688	0.928	1.445					0.511	1.327
	0.543	1.478	0.506	1.362			0.753	1.214	1.114	1.385			1.025	1.649	1.33	1.594		MEAN	0.5595	1.51375	0.605143	1.44914
			0.525	1.422			1.212	1.501	0.967	1.537			0.866	1.608	1.739	1.385
			0.487	1.4					0.938	1.491			0.48	1.482	1.583	1.495
			0.519	1.442					0.558	1.574			0.652	1.606	1.511	1.533
			0.712	1.488					1.592	1.476			0.546	1.541	0.584	1.505
MEAN	0.6575	1.49525	0.626	1.43075					0.743	1.558			0.722	1.56	0.93	1.548
									0.918	1.52			0.876	1.556	1.962	1.394
									1.026	1.579			0.573	1.432	1.697	1.443
						MEAN	1.138	1.53511	1.03747	1.56607			0.76	1.445	0.745	1.23
													0.645	1.579	0.883	1.561
													0.777	1.574	1.846	1.241
															1.537	1.361
															0.856	1.584
															1.144	1.483
															1.354	1.521
															2.337	1.443
															0.826	1.405
															1.158	1.407
															1.594	1.326
															1.558	1.387
															0.815	1.331
															0.991	1.409
															0.945	1.385
															0.779	1.534
															1.051	1.55
															0.756	1.54
												MEAN	0.762444	1.58728	1.17945	1.46561

## Sheet: panel_E Mann-Whitney test
uRH						IC
XM			YM			XM			YM
	RH XM rpg-1			RH YM rpg-1			IC XM rpg-1			IC YM rpg-1
	vs,			vs,			vs,			vs,
	RH XM WT			RH YM WT			IC XM WT			IC YM WT
Mann Whitney test			Mann Whitney test			Mann Whitney test			Mann Whitney test
P value	0.8948		P value	0.238		P value	0.5985		P value	0.8153
Exact or approximate P value?	Exact		Exact or approximate P value?	Exact		Exact or approximate P value?	Exact		Exact or approximate P value?	Exact
P value summary	ns		P value summary	ns		P value summary	ns		P value summary	ns
Significantly different (P < 0.05)?	No		Significantly different (P < 0.05)?	No		Significantly different (P < 0.05)?	No		Significantly different (P < 0.05)?	No
One- or two-tailed P value?	Two-tailed		One- or two-tailed P value?	Two-tailed		One- or two-tailed P value?	Two-tailed		One- or two-tailed P value?	Two-tailed
Sum of ranks in column A,B	86 , 124		Sum of ranks in column J,K	100 , 110		Sum of ranks in column C,D	122 , 178		Sum of ranks in column L,M	117 , 183
Mann-Whitney U	46		Mann-Whitney U	32		Mann-Whitney U	58		Mann-Whitney U	63
Difference between medians			Difference between medians			Difference between medians			Difference between medians
Median of column A	0,5325, n=8		Median of column J	1,518, n=8		Median of column C	1,015, n=9		Median of column L	1,597, n=9
Median of column B	0,5640, n=12		Median of column K	1,434, n=12		Median of column D	0,9380, n=15		Median of column M	1,574, n=15
Difference: Actual	0.0315		Difference: Actual	-0.0835		Difference: Actual	-0.077		Difference: Actual	-0.023
Difference: Hodges-Lehmann	-0.0025		Difference: Hodges-Lehmann	-0.0705		Difference: Hodges-Lehmann	-0.048		Difference: Hodges-Lehmann	-0.018
IT						CC
XM			YM			XM			YM
	IT XM rpg-1			IT YM rpg-1			CC XM rpg-1			CC YM rpg-1
	vs,			vs,			vs,			vs,
	IT XM WT			IT YM WT			CC XM WT			CC YM WT
Mann Whitney test			Mann Whitney test			Mann Whitney test			Mann Whitney test
P value	<0,0001		P value	0.0001		P value	>0,9999		P value	0.2303
Exact or approximate P value?	Exact		Exact or approximate P value?	Exact		Exact or approximate P value?	Exact		Exact or approximate P value?	Exact
P value summary	****		P value summary	***		P value summary	ns		P value summary	ns
Significantly different (P < 0.05)?	Yes		Significantly different (P < 0.05)?	Yes		Significantly different (P < 0.05)?	No		Significantly different (P < 0.05)?	No
One- or two-tailed P value?	Two-tailed		One- or two-tailed P value?	Two-tailed		One- or two-tailed P value?	Two-tailed		One- or two-tailed P value?	Two-tailed
Sum of ranks in column E,F	262 , 1064		Sum of ranks in column N,O	656,5 , 669,5		Sum of ranks in column G,H	24 , 42		Sum of ranks in column P,Q	31 , 35
Mann-Whitney U	91		Mann-Whitney U	108.5		Mann-Whitney U	14		Mann-Whitney U	7
Difference between medians			Difference between medians			Difference between medians			Difference between medians
Median of column E	0,7085, n=18		Median of column N	1,585, n=18		Median of column G	0,5485, n=4		Median of column P	1,628, n=4
Median of column F	1,051, n=33		Median of column O	1,483, n=33		Median of column H	0,5460, n=7		Median of column Q	1,362, n=7
Difference: Actual	0.3425		Difference: Actual	-0.1015		Difference: Actual	-0.0025		Difference: Actual	-0.266
Difference: Hodges-Lehmann	0.324		Difference: Hodges-Lehmann	-0.117		Difference: Hodges-Lehmann	0.035		Difference: Hodges-Lehmann	-0.08
