# Supplementary material for: RPG acts as a central determinant for infectosome formation and cellular polarization during intracellular rhizobial infections
Source: eLife journal article supplement (doi:10.7554/elife.80741), 2023-02-22
Supplement: fig5-figsupp4-data1 [file elife-80741-fig5-figsupp4-data1-v2.zip]

## Sheet: FLIM fit
Fig 5-fig suppl 4 uRH	Number	Channel	Tail Offset Cnts	Amplitude 1 kCnts	Amplitude 2 kCnts	Lifetime (τ) 1 ns	Lifetime (τ) 2 ns	IRF Background Cnts	IRF Shift ns	Intensity 1 kCnts	Intensity 2 kCnts	Sum Amplitudes kCnts	Sum Intensity kCnts	Mean τ, Intensity Weighted ns	Mean τ, Amplitude Weighted ns	χ²
	1	HyD 4_1	504.262	41.3347	141.873	0.39022	3.17039	0	0	166.337	4533.95	183.207	4700.29	3.07201	2.54314	5.85983
	2	HyD 4_2	131.984	104.817	169.078	0.778738	1.55606	0	0	841.759	2712.17	273.895	3553.93	1.37195	1.25858	0.952817
Fig 5-fig suppl 4 IC	Number	Channel	Tail Offset Cnts	Amplitude 1 kCnts	Amplitude 2 kCnts	Amplitude 3 kCnts	Lifetime (τ) 1 ns	Lifetime (τ) 2 ns	Lifetime (τ) 3 ns	IRF Background Cnts	IRF Shift ns	Intensity 1 kCnts	Intensity 2 kCnts	Intensity 3 kCnts	Sum Amplitudes kCnts	Sum Intensity kCnts	Mean τ, Intensity Weighted ns	Mean τ, Amplitude Weighted ns	χ²
	1	HyD 4_1	0	411.005	122.404	36.5928	0.257875	0.838321	3.26974	0	0	1093	1058.21	1202.68	570.002	3353.88	1.52105	0.575876	19.1369
	2	HyD 4_2	386.165	221.504	125.096		0.366778	1.47417		0	0	837.815	1901.32		346.6	2739.13	1.13545	0.766464	8.05771
Fig 5-fig suppl 4 IT	Number	Channel	Tail Offset Cnts	Amplitude 1 kCnts	Amplitude 2 kCnts	Amplitude 3 kCnts	Lifetime (τ) 1 ns	Lifetime (τ) 2 ns	Lifetime (τ) 3 ns	IRF Background Cnts	IRF Shift ns	Intensity 1 kCnts	Intensity 2 kCnts	Intensity 3 kCnts	Sum Amplitudes kCnts	Sum Intensity kCnts	Mean τ, Intensity Weighted ns	Mean τ, Amplitude Weighted ns	χ²
	1	HyD 4_1	0	658.922	181.974	94.5635	0.253018	0.858918	3.27619	0	0	1719.29	1611.85	3108.56	935.459	6439.7	1.86402	0.676489	14.6902
	2	HyD 4_2	568.381	262.617	231.221		0.426344	1.51065		0	0	1154.64	3601.11		493.837	4755.75	1.24739	0.934028	6.9488
Fig 5-fig suppl 4 CC	Number	Channel	Tail Offset Cnts	Amplitude 1 kCnts	Amplitude 2 kCnts	Lifetime (τ) 1 ns	Lifetime (τ) 2 ns	IRF Background Cnts	IRF Shift ns	Intensity 1 kCnts	Intensity 2 kCnts	Sum Amplitudes kCnts	Sum Intensity kCnts	Mean τ, Intensity Weighted ns	Mean τ, Amplitude Weighted ns	χ²
	1	HyD 4_1	314.355	52.4181	28.7563	0.346636	3.02046	0	0	187.378	877.304	81.1745	1064.68	2.54988	1.29385	29.8784
	2	HyD 4_2	130.025	46.7887	58.5057	0.468612	1.52332	0	0	226.109	918.795	105.294	1144.9	1.31502	1.05465	2.62924
