# Supplementary material for: RPG acts as a central determinant for infectosome formation and cellular polarization during intracellular rhizobial infections
Source: eLife journal article supplement (doi:10.7554/elife.80741), 2023-02-22
Supplement: fig5-figsupp5-data1 [file elife-80741-fig5-figsupp5-data1-v2.zip]

## Sheet: Fig 5 Suppl 5_panel A_FLIM fit
Fig 5 - fig suppl 5A absent	Number	Channel	Region	Tail Offset Cnts	Amplitude 1 kCnts	Amplitude 2 kCnts	Amplitude 3 kCnts	Lifetime (τ) 1 ns	Lifetime (τ) 2 ns	Lifetime (τ) 3 ns	IRF Background Cnts	IRF Shift ns	Intensity 1 kCnts	Intensity 2 kCnts	Intensity 3 kCnts	Sum Amplitudes kCnts	Sum Intensity kCnts	Mean τ, Intensity Weighted ns	Mean τ, Amplitude Weighted ns	χ²
	1	HyD 4_1	Overall Decay	21396.7	339.983	97.0198	27.2544	0.261235	1.10334	4.73672	0	0	915.91	1103.89	1226.16	464.257	3245.96	2.23823	0.699953	7.94255
	2	HyD 4_1	ROI 1	86.7148	4.02728	1.81254		0.343026	2.6088		0	0	14.2463	48.3123		5.83982	62.5586	2.09282	1.04627	1.15297
	3	HyD 4_2	Overall Decay	23316.8	118.14	151.345		0.674085	1.63641		0	0	821.248	2552.64		269.485	3373.89	1.40217	1.21454	1.18934
	4	HyD 4_2	ROI 1
Fig 5 - fig suppl 5A multiple polar sites - focal plane 1	Number	Channel	Region	Tail Offset Cnts	Amplitude 1 kCnts	Amplitude 2 kCnts	Amplitude 3 kCnts	Lifetime (τ) 1 ns	Lifetime (τ) 2 ns	Lifetime (τ) 3 ns	IRF Background Cnts	IRF Shift ns	Intensity 1 kCnts	Intensity 2 kCnts	Intensity 3 kCnts	Sum Amplitudes kCnts	Sum Intensity kCnts	Mean τ, Intensity Weighted ns	Mean τ, Amplitude Weighted ns	χ²
	1	HyD 4_1	Overall Decay	37349	1330.82	356.111	65.1344	0.23956	0.79397	3.16426	0	0	3287.75	2915.77	2074.88	1752.07	8278.4	1.16787	0.460973	12.2074
	2	HyD 4_1	ROI 1	70.3656	2.85034	3.48914		0.3853	2.96572		0	0	11.3255	105.19		6.33947	116.516	2.7149	1.80552	0.907035
	3	HyD 4_2	Overall Decay	38179.4	181.774	205.352		0.547737	1.68268		0	0	1026.75	3561.16		387.125	4587.92	1.42868	1.14977	2.47274
	4	HyD 4_2	ROI 1
Fig 5 - fig suppl 5A multiple polar sites - focal plane 2	Number	Channel	Region	Tail Offset Cnts	Amplitude 1 kCnts	Amplitude 2 kCnts	Amplitude 3 kCnts	Lifetime (τ) 1 ns	Lifetime (τ) 2 ns	Lifetime (τ) 3 ns	IRF Background Cnts	IRF Shift ns	Intensity 1 kCnts	Intensity 2 kCnts	Intensity 3 kCnts	Sum Amplitudes kCnts	Sum Intensity kCnts	Mean τ, Intensity Weighted ns	Mean τ, Amplitude Weighted ns	χ²
	1	HyD 4_1	Overall Decay	43982	1369.95	335.15	56.2618	0.230834	0.811236	3.31159	0	0	3261.14	2803.82	1870.48	1761.36	7935.44	1.16208	0.439678	13.7287
	2	HyD 4_1	ROI 1	39.8699	0.903925	1.36231		0.381581	3.08394		0	0	3.55699	42.448		2.26624	46.0049	2.875	2.00606	0.922316
	3	HyD 4_2	Overall Decay	44191.1	107.085	116.133		0.405301	1.51218		0	0	447.581	1810.5		223.219	2258.08	1.29278	0.981174	2.44427
	4	HyD 4_2	ROI 1
