# Supplementary material for: RPG acts as a central determinant for infectosome formation and cellular polarization during intracellular rhizobial infections
Source: eLife journal article supplement (doi:10.7554/elife.80741), 2023-02-22
Supplement: fig6-data1 [file Figure 6B - tip-to-N distance.xlsx]

## Sheet: Values
Tip-to nucleus distance (um)
WT A17		rpg-1
Plant 1	30.612	177.129	Plant 1
Plant 1	9.368	61.266	Plant 2
Plant 1	43.467	29.363	Plant 2
Plant 2	23.354	20.08	Plant 2
Plant 2	84.157	64.769	Plant 2
Plant 2	59.329	68.599	Plant 2
Plant 2	26.35	107.262	Plant 3
Plant 3	28.44	71.304	Plant 3
Plant 3	0.228	18.202	Plant 4
Plant 3	30.82	24.154	Plant 5
Palnt 4	38.75	29.038	Plant 5
Plant 5	84.823	25.006	Plant 5
Plant 5	33.492	15.114	Plant 5
Plant 6	43.419	54.764	Plant 6
		54.517	Plant 7
		20.872	Plant 7
		1.979	Plant 7
		157.469	Plant 7
		77.079	Plant 7
		47.234	Plant 7
		59.252	Plant 7
		131.436	Plant 7
		110.678	Plant 8
		34.055	Plant 8
		117.377	Plant 8
		145.592	Plant 8
		22.831	Plant 9
		136.806	Plant 9
		146.433	Plant 9
		96.657	Plant 9
		72.867	Plant 9
		193.547	Plant 10
		46.531	Plant 11
		62.591	Plant 11
		106.981	Plant 11
		47.218	Plant 11
		30.245	Plant 11
		96.641	Plant 11
		49.82	Plant 12
		42.807	Plant 13
		42.806	Plant 13
		67.405	Plant 13
		70.108	Plant 14
		79.485	Plant 14
		150.421	Plant 14
		29.038	Plant 14
		103.589	Plant 14
		161.684	Plant 14

## Sheet: Mann-Whitney
Mann-Whitney test
Column B	rpg-1
vs.	vs,
Column A	WT A17
Mann Whitney test
P value	0.0118
Exact or approximate P value?	Exact
P value summary	*
Significantly different (P < 0.05)?	Yes
One- or two-tailed P value?	Two-tailed
Sum of ranks in column A,B	293 , 1660
Mann-Whitney U	188
Difference between medians
Median of column A	32,16, n=14
Median of column B	63,68, n=48
Difference: Actual	31.52
Difference: Hodges-Lehmann	28.03
