# Supplementary material for: RPG acts as a central determinant for infectosome formation and cellular polarization during intracellular rhizobial infections
Source: eLife. 2023 Mar 1;12:e80741. doi: 10.7554/eLife.80741 (PMC9991063; doi:10.7554/eLife.80741)
Supplement: Supplementary file 1. [file elife-80741-supp1.xlsx]

## Sheet: L2
		Supplementary File 1. List of constructs used in this study.
	Construct	Experiment	Backbone	Position 1	Position 2	Position 3	Position 4	Position 5	Position 6	Golden Gate version
L2 expression vectors	pRPG::mCherry-RPG-FL/pLjUbi::NLS-2xCFP	complementation assay, RPG localization pattern	pL2V-EC50507	pLjUbi::NLS-2xCFP	insulator	pRPG::mCherry-RPG-FL	ELE3			Weber et al., 2011
	pRPG::mCherry-CC-331-1255/pLjUbi::NLS-2xCFP	complementation assay, RPG localization pattern	pL2V-EC50507	pLjUbi::NLS-2xCFP	insulator	pRPG::mCherry-CC-331-1255	ELE3			Weber et al., 2011
	pRPG::mCherry-CC-474-1255/pLjUbi::NLS-2xCFP	complementation assay, RPG localization pattern	pL2V-EC50507	pLjUbi::NLS-2xCFP	insulator	pRPG::mCherry-CC-474-1255	ELE3			Weber et al., 2011
	pRPG::mCherry-NT-1-330/pLjUbi::NLS-2xCFP	complementation assay, RPG localization pattern	pL2V-EC50507	pLjUbi::NLS-2xCFP	insulator	pRPG::mCherry-NT-1-330	ELE3			Weber et al., 2011
	EV/pLjUbi::NLS-2xCFP	Complementation assay	pL2V-EC50507	pLjUbi::NLS-2xCFP	insulator	dummy	ELE3			Weber et al., 2011
	pLjUbi::GFP-RPG/p35S::NLS-2xmCherry	RPG localization pattern in N. benthamiana	L3βF A-B	pLjUbi::GFP-RPG	dummy	dummy	insulator	p35S::NLS-2xmCherry		Binder et al., 2014
	pVPY::VPY-GFP/pRPG::mCherry-RPG/pAtUbi::NLS-2xNowGFP	co-localization RPG-VPY	pL2V-EC50507	pVPY::VPY-GFP	insulator	pRPG::mCherry-RPG	insulator	pAtUbi::NLS-2xNowGFP	ELE5	Weber et al., 2011
	pVPY::VPY-GFP/pLjUbi::NLS-2xmCherry	VPY localization pattern	pL2V-EC50507	pVPY::VPY-GFP	insulator	dummy	insulator	pLjUbi::NLS-2xmCherry	ELE5	Weber et al., 2011
	pLjUbi::mCherry-LIN/pRPG::GFP-RPG/pLUbi::NLS-3xmScarlet	co-localization RPG-LIN	pL2V-EC50507	pLUbi::NLS-3xmScarlet	pLjUbi::mCherry-LIN	pRPG::GFP-RPG	ELE3			Weber et al., 2011
	pLjUbi::VPY-GFP/pAtUbi::NLS-3xmScarlet	VPY-RPG localization pattern uninoculated	pL2V-EC50507	pLjUbi::VPY-GFP	insulator	dummy	insulator	pAtUbi::NLS-3xmScarlet	ELE5	Weber et al., 2011
	pLjUbi::VPY-GFP/pLjUbi::mCherry-RPG/pAtUbi::NLS-3xmScarlet	VPY-RPG localization pattern uninoculated	pL2V-EC50507	pLjUbi::VPY-GFP	insulator	pLjUbi::mCherry-RPG	insulator	pAtUbi::NLS-3xmScarlet	ELE5	Weber et al., 2011
	pLjUbi::VPY-GFP	coimmunoprecipitation	pL2V-EC50507	dummy	insulator	dummy	insulator	pLjUbi::VPY-GFP	ELE5	Weber et al., 2011
	pLjUbi::mCherry-EXO70H4	coimmunoprecipitation	pL2V-EC50507	dummy	insulator	dummy	pLjUbi::mCherry-EXO70H4	ELE4		Weber et al., 2011
	pENOD11:mCitrine:2xPH-PLC/pLjUbi::NLS-2xmCherry	phosphoinositide patterning	pL2V-EC50507	pLjUbi::NLS-2xmCherry	insulator	dummy	insulator	pENOD11:mCitrine:2xPH-PLC	ELE5	Weber et al., 2011
	pENOD11:mCitrine:2xPH-PLC MUT/pLjUbi::NLS-2xmCherry	phosphoinositide patterning	pL2V-EC50507	pLjUbi::NLS-2xmCherry	insulator	dummy	insulator	pENOD11:mCitrine:2xPH-PLC MUT	ELE5	Weber et al., 2011
	pENOD11::Cherry-2xPH-FAPP1/pENOD11::Citrine-2xPH-PLC/pLjUbi-NLS-3xmScarlet	phosphoinositide patterning	pL2V-EC50507	pLjUbi::NLS-3xmScarlet	pENOD11::mCherry:2xPH-FAPP1	dummy	insulator	pENOD11:mCitrine:2xPH-PLC	ELE5	Weber et al., 2011
	pSYMTUB::GFP-SYMTUB/pLjUbi::NLS-2xmCherry	microtubule labelling	pL2V-EC50507	pLjUbi::NLS-2xmCherry	insulator	dummy	insulator	pSYMTUB-GFP-SYMTUB	ELE5	Weber et al., 2011
	pNPL::NPL-GFP/pLjUbi::NLS-2xmCherry	NPL localization pattern	pL2V-EC50507	pLjUbi::NLS-2xmCherry	insulator	pNPL::NPL-GFP	ELE3			Weber et al., 2011

## Sheet: L1
Supplementary File 1. List of constructs used in this study.
	Construct	Experiment	Backbone	Promoter	N-terminal tag	ORF/CDS	C-terminal tag	Terminator	Golden Gate version
L1	pRPG::mCherry-RPG-FL	complementation assay, RPG localization pattern, co-localization RPG-VPY	pL1V-F3-47751	pRPG (1777 bp)	mCherry-GGGGSGGGGSGGGGS linker	RPG-CDS	dummy	T35S	Weber et al., 2011
	pRPG::mCherry-CC-331-1255	complementation assay, RPG localization pattern	pL1V-F3-47751	pRPG (1777 bp)	mCherry-GGGGSGGGGSGGGGS linker	RPG-CC331-1255-CDS	dummy	T35S	Weber et al., 2011
	pRPG::mCherry-CC-474-1255	complementation assay, RPG localization pattern	pL1V-F3-47751	pRPG (1777 bp)	mCherry-GGGGSGGGGSGGGGS linker	RPG-CC474-1255-CDS	dummy	T35S	Weber et al., 2011
	pRPG::mCherry-NT-1-330	complementation assay, RPG localization pattern	pL1V-F3-47751	pRPG (1777 bp)	mCherry-GGGGSGGGGSGGGGS linker	RPG-NT1-330-CDS	dummy	T35S	Weber et al., 2011
	pRPG::GFP-RPG	co-localization RPG-LIN	pL1V-F3-47751	pRPG (1777 bp)	GFP-GG linker	RPG-CDS	dummy	T35S	Weber et al., 2011
	pVPY::VPY-GFP	VPY localization pattern, co-localization RPG-VPY/VPY-RPG localization pattern uninoculated	pL1V-R1-47802	pVPY (2926 bp)	none	VPY-ORF	GG linker-S65TGFP-ST-LS1 intron	TNOS	Weber et al., 2011
	pLjUbi::mCherry-LIN	co-localization RPG-LIN	pL1V-R2-47811	pLjUbi	mCherry-GG linker	LIN-CDS	none	TNOS	Weber et al., 2011
	pLjUbi::mCherry-RPG	VPY-RPG localization pattern uninoculated	pL1V-F3-47751	pLjUbi	mCherry-GGGGSGGGGSGGGGS linker	RPG-CDS	dummy	T35S	Weber et al., 2011
	pLjUbi::VPY-GFP	VPY-RPG localization pattern uninoculated	pL1V-R1-47802	pLjUbi	none	VPY-ORF	GG linker-S65TGFP-ST-LS1 intron	TNOS	Weber et al., 2011
	pLjUbi::VPY-GFP	coimmunoprecipitation	pL1V-F5-47772	pLjUbi	none	VPY-ORF	GG linker-eGFP-ST-LS1 intron	TNOS	Weber et al., 2011
	pLjUbi::mCherry-EXO70H4	coimmunoprecipitation	pL1V-F4-47761	pLjUbi	mCherry-GG linker	EXO70H4-CDS	none	T35S	Weber et al., 2011
	pLjUbi::mCherry-RPG	coimmunoprecipitation	L2βF 1-2 BB20	pLjUbi	mCherry-GGGGSGGGGSGGGGS linker	RPG-CDS	dummy	T35S	Binder et al., 2014
	pLjUbi::GFP-RPG	coimmunoprecipitation	L2βF 1-2 BB20	pLjUbi	GFP-GGGGSGGGGSGGGGS linker	RPG-CDS	dummy	T35S	Binder et al., 2014
	pENOD11::mCitrine:2xPH-PLC	phosphoinositide patterning	pL1V-F5-47772	pENOD11 (1106 bp)	mCitrine-GG linker	2xPH-PLC-CDS	none	TNOS	Weber et al., 2011
	pENOD11::mCitrine:2xPH-PLC MUT	phosphoinositide patterning	pL1V-F5-47772	pENOD11 (1106 bp)	mCitrine-GG linker	2xPH-PLC MUT-CDS	none	TNOS	Weber et al., 2011
	pENOD11::mCherry:2xPH-FAPP1	phosphoinositide patterning	pL1V-R2-47811	pENOD11 (1106 bp)	mCitrine-GG linker	2xPH-FAPP1-CDS	none	TNOS	Weber et al., 2011
	pSYMTUB::GFP-SYMTUB	microtubule labelling	pL1V-F5-47772	pSYMTUB (1555 bp)	GFP-GG linker	SYMTUB-CDS	none	TNOS	Weber et al., 2011
	pNPL::NPL-GFP	NPL localization pattern	pL1V-F3-47751	pNPL (2038 bp)	none	NPL-CDS	GG linker-GFP	T35S	Weber et al., 2011
L1 selection markers	pLjUbi::NLS-2xCFP	selection marker	pL1V-R1-47802	pLjUbi	NLS	2xCFP	none	T35S	Weber et al., 2011
	pAtUbi::NLS-2xNowGFP	selection marker	pL1V-F5-47772	pAtUbi	NLS	2xNowGFP	dummy	TNOS	Weber et al., 2011
	pLjUbi::NLS-2xmCherry	selection marker	pL1V-F5-47772	pLjUbi	NLS	mCherry	mCherry	TNOS	Weber et al., 2011
	pLjUbi::NLS-3xmScarlet	selection marker	pL1V-R1-47802	pLjUbi	NLS	2xmScarlet	mScarlet	TNOS	Weber et al., 2011
	pLjUbi::NLS-2xmCherry	selection marker	pL1V-R1-47802	pLjUbi	NLS	mCherry	mCherry	TNOS	Weber et al., 2011
	p35S::NLS-2xmCherry	selection marker	LIIβR 5-6	p35S	NLS	mCherry	mCherry	T35S	Binder et al., 2014
	pAtUbi::NLS-3xmScarlet	selection marker	pL1V-F5-47772	pAtUbi	NLS	2xmScarlet	mScarlet	TAct2	Weber et al., 2011
